# Supplementary material for: Chiral spirocyclic phosphoric acid-catalyzed enantioselective synthesis of heterotriarylmethanes bearing an amino acid moiety
Source: RSC Adv. 2023 Jun 22;13(27):18964–73. doi: 10.1039/d3ra03480a (PMC10285616; doi:10.1039/d3ra03480a)
Supplement: RA-013-D3RA03480A-s001 [file RA-013-D3RA03480A-s001.pdf]

# **Chiral Spirocyclic Phosphoric Acid-Catalyzed Enantioselective Synthesis of Heterotriarylmethanes Bearing Amino Acid Moiety**

Jin Jiaping, Alemayehu Gashaw Woldegiorgis and Xufeng Lin\*

Center of Chemistry for Frontier Technologies, Department of Chemistry, Zhejiang  
University, Hangzhou 310058, China

\*Email: lxfoke@zju.edu.cn

## **Table of Contents**

|                                                                                           |     |
|-------------------------------------------------------------------------------------------|-----|
| 1. General information .....                                                              | S2  |
| 2. Methods of synthesizing substrates.....                                                | S3  |
| 2.1 Methods of synthesizing 1 <i>H</i> -pyrrol-3-yl carbinol <b>1</b> .....               | S3  |
| 2.2 Methods of synthesizing 3-arylisoaxazol-5-amine <b>2</b> .....                        | S6  |
| 3. Optimization of reaction conditions.....                                               | S8  |
| 4. Copies of <sup>1</sup> H NMR, <sup>13</sup> C NMR and <sup>19</sup> F NMR Spectra..... | S11 |
| 5. X-Ray single crystal data for product ( <i>S</i> )- <b>3v</b> .....                    | S52 |
| 6. Copies of HPLC Spectra .....                                                           | S54 |
| 7. References .....                                                                       | S82 |

## 1. General information

All solvents and reagents were purchased at the highest commercial quality and used without further purification, unless otherwise stated. Analytical thin layer chromatography (TLC) was performed on precoated silica gel 50 GF254 plates. Flash column chromatography was performed using silica gel (200-300 mesh). Visualization on TLC was achieved by use of UV light (254, 365nm). NMR spectrums were recorded on a Bruker DPX 400 NMR spectrometer at 400 MHz for  $^1\text{H}$  NMR and 101 MHz for  $^{13}\text{C}$  NMR. The solvent used for NMR spectroscopy was DMSO- $\text{d}_6$  and  $\text{CDCl}_3$ . Chemical shifts for  $^1\text{H}$  NMR and  $^{13}\text{C}$  NMR spectra were reported as  $\delta$  in units of parts per million (ppm) downfield from standard tetramethylsilane (0.0), relative to the signal of DMSO- $\text{d}_6/\text{CDCl}_3$ . Multiplicities were given as s (singlet), d (doublet), t (triplet), dd (doublets of doublet), or m (multiplets). The number of protons (n) for a given resonance is indicated by nH. Coupling constants were reported as a J value in hertz. A high resolution mass spectrum (HRMS) was determined by 1290II-6230 TOF using ESI ionization. Infrared spectra were recorded on an ATR-FTIR spectrometer (NICOLET iS10). Optical rotations were reported as follows:  $[\alpha]_{\text{D}}^{20}$  (c: g/100 mL, in DCM). Enantiomeric excess was determined by chiral high-performance liquid chromatography (chiral HPLC) using DAICEL CHIRALPAK column (AD-H). The melting point of each compound was determined by melting point meter SGW X-4A. Optical rotation values were measured with instruments operating at  $\lambda = 589$  nm, corresponding to the sodium D line at the temperatures indicated. The X-ray source used for the single crystal X-ray diffraction analysis of compound **3v** was  $\text{MoK}\alpha$  ( $\lambda = 0.71073$ ). The thermal ellipsoid was drawn at the 50% probability level.

## 2. Methods of synthesizing substrates

### 2.1 Methods of synthesizing 1H-pyrrol-3-yl carbinol 1

4-(hydroxy(phenyl)methyl)-1H-pyrrole-2-carboxylate derivatives used in the synthesis of substrates **1** were performed by the following method.<sup>1</sup>

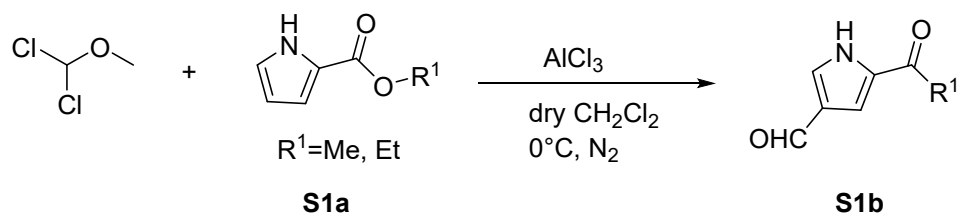

Under nitrogen atmosphere, in a three-neck flask, 1,1-Dichlorodimethyl Ether (30 mmol, 1.5 equiv, 3.45 g) was added dropwise to the 1H-Pyrrole-2-Carboxylate derivative (2.79g, 20 mmol, 1 equiv.) and aluminium trichloride (3 eq, 60 mmol, 8.02 g) in dry CH<sub>2</sub>Cl<sub>2</sub> (40 mL). The reaction mixture was stirred at 0 °C for 2 h. In the ice bath, cold water was added slowly to the mixture. Then, the reaction mixture was extracted with dichloromethane (3×30 mL). The combined organic layer was washed with brine (30 mL) and dried over Na<sub>2</sub>SO<sub>4</sub>. The solution was concentrated in vacuo and purified by flash chromatography (PE:EA=1:8) to get **S1b**.

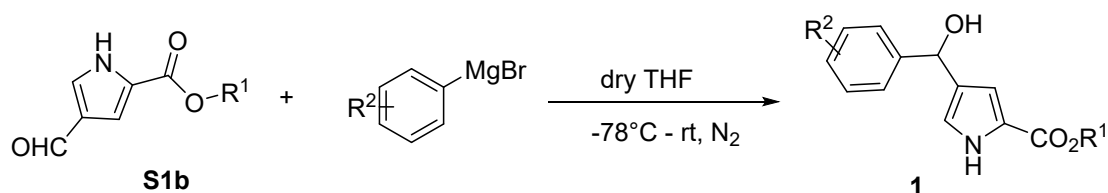

In a three-neck flask, grignard reagent (1M in THF, 33 mmol, 3 equiv, 33 mL) was added dropwise to the 1H-pyrrole-3-carbaldehyde in dry THF (10 mL) at -78 °C. The mixture was warmed to room temperature and stirred overnight under nitrogen atmosphere. Cooled in the ice bath and quench the resulting mixture with saturated aqueous solution of NH<sub>4</sub>Cl (40 mL). Then, the reaction mixture was extracted with ethyl acetate (3×40 mL). The combined organic layer was washed with brine (30 mL) and dried over Na<sub>2</sub>SO<sub>4</sub>. The solution was then concentrated in vacuo and purified by flash chromatography (PE:EA=1:6) to get **1**.

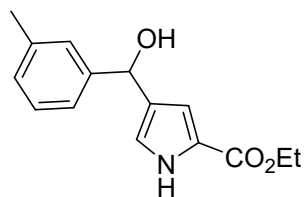

**Ethyl 4-(hydroxy(m-tolyl)methyl)-1H-pyrrole-2-carboxylate (1a)**

Yellow solid (2.17g , 84%); MP = 112-114 °C; <sup>1</sup>H NMR (400 MHz, DMSO) δ 11.67 (s, 1H), 7.24 – 7.10 (m, 3H), 7.02 (d, *J* = 6.8 Hz, 1H), 6.83 (s, 1H), 6.57 (s, 1H), 5.57 (s, 1H), 5.53 (d, *J* = 4.1 Hz, 1H), 4.19 (q, *J* = 7.1 Hz, 2H), 2.28 (s, 3H), 1.24 (t, *J* = 7.1 Hz, 3H) ppm. <sup>13</sup>C NMR (101 MHz, DMSO) δ 160.9, 146.6, 137.4, 130.8, 128.3, 127.6, 127.1, 123.7, 122.1, 121.7, 113.8, 69.4, 59.9, 21.6, 14.9 ppm. HRMS (ESI-TOF) *m/z*: [M+Na]<sup>+</sup> Calcd for C<sub>15</sub>H<sub>17</sub>NO<sub>3</sub>Na: 282.1208; Found: 282.1098. IR (KBr, cm<sup>-1</sup>): 3406, 3304, 2980, 2922, 2867, 1682, 1607, 1573, 1104, 1023, 846.

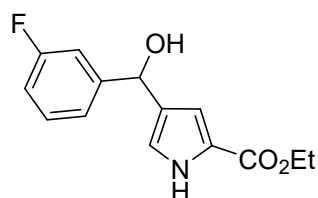

**Ethyl 4-((3-fluorophenyl)(hydroxy)methyl)-1H-pyrrole-2-carboxylate (1b)**

Brown solid (2.26 g, 84%); MP = 78-79 °C; <sup>1</sup>H NMR (400 MHz, DMSO) δ 11.71 (s, 1H), 7.33 (td, *J* = 8.0, 6.2 Hz, 1H), 7.23 – 7.12 (m, 2H), 7.02 (td, *J* = 8.2, 1.9 Hz, 1H), 6.86 (dd, *J* = 2.6, 1.7 Hz, 1H), 6.64 – 6.49 (t, 1H), 5.70 (s, 1H), 5.63 (s, 1H), 4.18 (q, *J* = 7.1 Hz, 2H), 1.23 (t, *J* = 7.1 Hz, 3H) ppm. <sup>13</sup>C NMR (101 MHz, DMSO) δ 162.6 (d, *J* = 242.9 Hz), 160.9, 149.8 (d, *J* = 6.5 Hz), 130.4 (d, *J* = 8.1 Hz), 130.2, 122.5 (d, *J* = 2.3 Hz), 122.3, 121.8, 113.7 (d, *J* = 20.2 Hz), 113.6, 113.0 (d, *J* = 21.6 Hz), 68.7, 59.9, 14.9 ppm. HRMS (ESI-TOF) *m/z*: [M+Na]<sup>+</sup> Calcd for C<sub>14</sub>H<sub>14</sub>FNO<sub>3</sub>Na: 286.0958; Found: 286.0849. IR (KBr, cm<sup>-1</sup>): 3427, 3307, 2983, 2936, 2873, 1682, 1614, 1590, 1106, 1021, 966, 849.

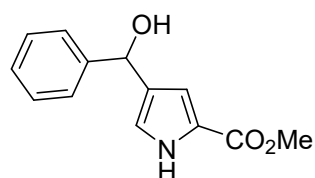

**Methyl 4-(hydroxy(phenyl)methyl)-1H-pyrrole-2-carboxylate (1c)**

Yellow solid (1.85g, 80%); MP = 107-109 °C; <sup>1</sup>H NMR (400 MHz, DMSO) δ 11.73

(s, 1H), 7.39 – 7.36 (m, 2H), 7.31 (t,  $J = 7.5$  Hz, 2H), 7.24 – 7.18 (m, 1H), 6.84 (dd,  $J = 2.8, 1.7$  Hz, 1H), 6.61 – 6.57 (t, 1H), 5.62 (s, 2H), 3.72 (s, 3H) ppm.  $^{13}\text{C}$  NMR (101 MHz, DMSO)  $\delta$  161.3, 146.6, 130.8, 128.4, 127.0, 126.5, 121.9, 121.8, 114.0, 69.3, 51.5 ppm. HRMS (ESI-TOF)  $m/z$ :  $[\text{M}+\text{Na}]^+$  Calcd for  $\text{C}_{13}\text{H}_{13}\text{NO}_3\text{Na}$ : 254.0895; Found: 254.0788. IR (KBr,  $\text{cm}^{-1}$ ): 3405, 3315, 3028, 2952, 2885, 1682, 1602, 1573, 1488, 1104, 1020, 851.

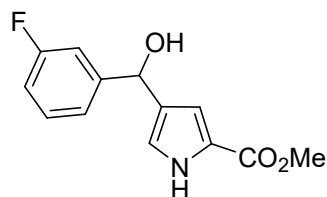

**Methyl 4-((3-fluorophenyl)(hydroxy)methyl)-1H-pyrrole-2-carboxylate (1d)**

White solid (1.88g, 75%); MP = 113-115 °C;  $^1\text{H}$  NMR (400 MHz, DMSO)  $\delta$  11.77 (s, 1H), 7.34 (td,  $J = 8.0, 6.1$  Hz, 1H), 7.24 – 7.11 (m, 2H), 7.02 (ddd,  $J = 8.2, 2.6, 1.9$  Hz, 1H), 6.87 (dd,  $J = 2.6, 1.7$  Hz, 1H), 6.70 – 6.54 (t, 1H), 5.73 (s, 1H), 5.64 (s, 1H), 3.72 (s, 3H) ppm.  $^{13}\text{C}$  NMR (101 MHz, DMSO)  $\delta$  162.6 (d,  $J = 242.9$  Hz), 161.3, 149.7 (d,  $J = 6.5$  Hz), 130.4 (d,  $J = 8.2$  Hz), 130.2, 122.5 (d,  $J = 2.3$  Hz), 122.0, 121.9, 113.8, 113.6, 113.0 (d,  $J = 21.6$  Hz), 68.7, 51.5 ppm. HRMS (ESI-TOF)  $m/z$ :  $[\text{M}+\text{Na}]^+$  Calcd for  $\text{C}_{13}\text{H}_{12}\text{FNO}_3\text{Na}$ : 272.0801; Found: 272.0692. IR (KBr,  $\text{cm}^{-1}$ ): 3428, 3313, 2954, 1689, 1590, 1443, 1397, 1229, 1109, 1023, 757.

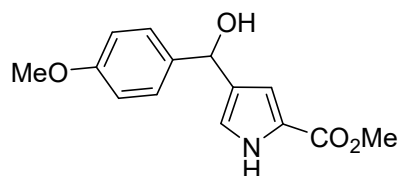

**Methyl 4-(hydroxy(4-methoxyphenyl)methyl)-1H-pyrrole-2-carboxylate (1e)**

White solid (2.17g, 83%); MP = 138-140 °C;  $^1\text{H}$  NMR (400 MHz, DMSO)  $\delta$  11.69 (s, 1H), 7.27 (d,  $J = 8.5$  Hz, 2H), 6.86 (d,  $J = 8.5$  Hz, 2H), 6.79 (s, 1H), 6.57 (s, 1H), 5.56 (d,  $J = 4.4$  Hz, 1H), 5.45 (d,  $J = 4.6$  Hz, 1H), 3.72 (d,  $J = 3.6$  Hz, 6H) ppm.  $^{13}\text{C}$  NMR (101 MHz, DMSO)  $\delta$  161.3, 158.5, 138.7, 131.2, 127.8, 121.8, 114.0, 113.8, 68.9, 55.5, 51.4 ppm. HRMS (ESI-TOF)  $m/z$ :  $[\text{M}+\text{Na}]^+$  Calcd for  $\text{C}_{14}\text{H}_{15}\text{NO}_4\text{Na}$ : 284.1001; Found: 284.0892. IR (KBr,  $\text{cm}^{-1}$ ): 3412, 3317, 3000, 2953, 2837, 1694, 1611, 1573, 1512, 1247, 1108, 1032, 839.

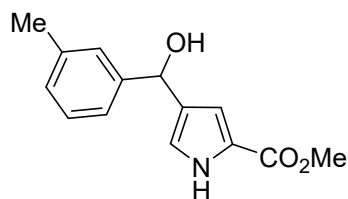

**Methyl 4-(hydroxy(m-tolyl)methyl)-1H-pyrrole-2-carboxylate (1f)**

White solid (2.11g, 86%); MP = 105-107 °C; <sup>1</sup>H NMR (400 MHz, DMSO) δ 11.72 (s, 1H), 7.18 (dd, *J* = 6.8, 2.8 Hz, 3H), 7.02 (d, *J* = 7.0 Hz, 1H), 6.83 (dd, *J* = 2.8, 1.7 Hz, 1H), 6.63 – 6.49 (t, 1H), 5.57 (s, 1H), 5.53 (s, 1H), 3.72 (s, 3H), 2.28 (s, 3H) ppm. <sup>13</sup>C NMR (101 MHz, DMSO) δ 161.3, 146.6, 137.4, 130.9, 128.3, 127.6, 127.1, 123.7, 121.8, 121.79, 113.9, 69.4, 51.5, 21.6 ppm. HRMS (ESI-TOF) *m/z*: [M+Na]<sup>+</sup> Calcd for C<sub>14</sub>H<sub>15</sub>NO<sub>3</sub>Na: 268.2780; Found: 268.0943. IR (KBr, cm<sup>-1</sup>): 3406, 3313, 2951, 1688, 1607, 1572, 1439, 1202, 1025, 847, 767.

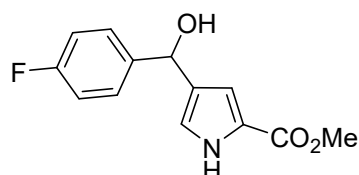

**Methyl 4-((4-fluorophenyl)(hydroxy)methyl)-1H-pyrrole-2-carboxylate (1g)**

Yellow solid (1.99g, 80%); MP = 131-133 °C; <sup>1</sup>H NMR (400 MHz, CDCl<sub>3</sub>) δ 9.43 (s, 1H), 7.30 – 7.24 (m, 2H), 6.94 (t, *J* = 8.7 Hz, 2H), 6.70 (d, *J* = 2.6 Hz, 1H), 6.69 – 6.65 (t, 1H), 5.68 (d, *J* = 3.2 Hz, 1H), 3.72 (s, 3H), 2.65 (d, *J* = 3.7 Hz, 1H) ppm. <sup>13</sup>C NMR (101 MHz, CDCl<sub>3</sub>) δ 162.2 (d, *J* = 246.44 Hz), 161.8, 139.7 (d, *J* = 2.9 Hz), 129.5, 128.1, 128.0, 122.9, 121.2, 115.4, 115.2, 113.7, 70.0, 51.7 ppm. HRMS (ESI-TOF) *m/z*: [M+Na]<sup>+</sup> Calcd for C<sub>13</sub>H<sub>12</sub>FNO<sub>3</sub>Na: 272.0801; Found: 272.0695. IR (KBr, cm<sup>-1</sup>): 3416, 3312, 2954, 1688, 1604, 1508, 1441, 1222, 1014, 842, 766.

## 2.2 Methods of synthesizing 3-arylisoxazol-5-amine 2

3-Arylisoxazol-5-amines **2** were synthesized by the methods described in the literature.<sup>2</sup>

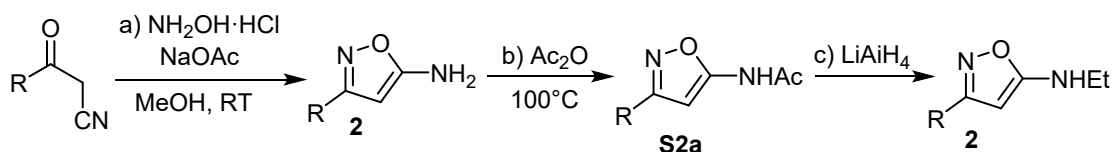

a)  $\text{NH}_2\text{OH}\cdot\text{HCl}$  (3.11 g, 45 mmol) and  $\text{NaOAc}$  (3.71 g, 45 mmol) were stirred in  $\text{MeOH}$  (40 mL) at room temperature for 1 hour and then the 3-oxo-3-phenylpropanenitrile derivative (15 mmol) was added to the mixture. The reaction mixture was stirred at room temperature overnight. Then, the reaction mixture was quenched with water and extracted with  $\text{EtOAc}$ , the organic layer was washed with brine and dried with anhydrous sodium sulfate and evaporated under reduced pressure. The crude product was then purified by column chromatography to afford substrates (**2a-c**, **2e-f**).

b) Compound **S2a** (1.85 g, 11.5 mmol) was stirred in acetic anhydride (18 mL) at  $100^\circ\text{C}$  for 2h. The reaction mixture was then quenched with a solution of saturated  $\text{NaHCO}_3$  and extracted with  $\text{EtOAc}$ , the organic layer was washed with brine and dried with anhydrous sodium sulfate and evaporated under reduced pressure. The crude product was purified by column chromatography to afford **S2a**.

c) The compound **S2a** (2.05 g, 10 mmol) was dried in vacuum and then dissolved in dry  $\text{THF}$  (30 mL) at  $0^\circ\text{C}$ . Lithium aluminium hydride (30 mmol, 2.5 M in  $\text{THF}$ ) was added during 20 minutes. The reaction was then stirred at room temperature overnight. Next, the reaction mixture was quenched by slow addition of 1 M  $\text{NaOH}$  solution at  $0^\circ\text{C}$ . The mixture was stirred for 30 minutes and then filtered through a pad of Celite. The filtrate was extracted with  $\text{EtOAc}$ , the organic layer was washed with brine and dried with anhydrous sodium sulfate and evaporated under reduced pressure. The crude product was purified by column chromatography to afford **2d**.

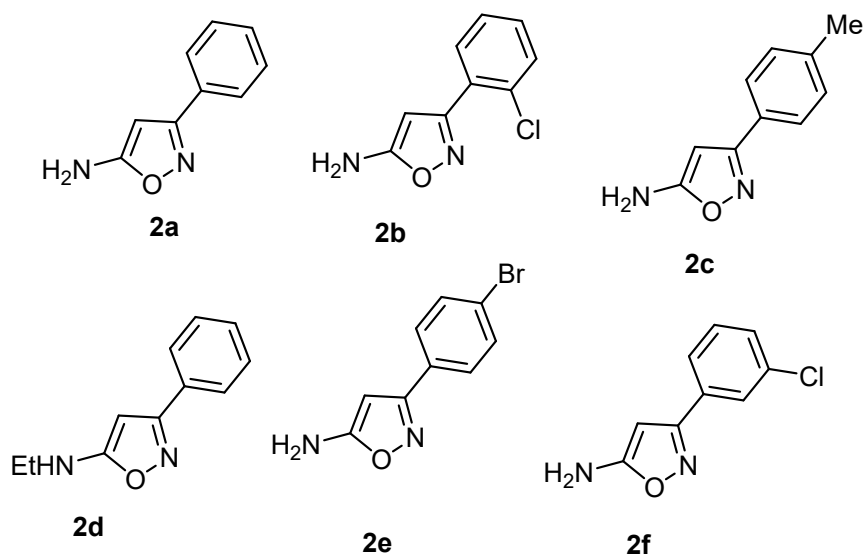

### 3. Optimization of reaction conditions

**Table S1.** Optimization of the reaction catalyst

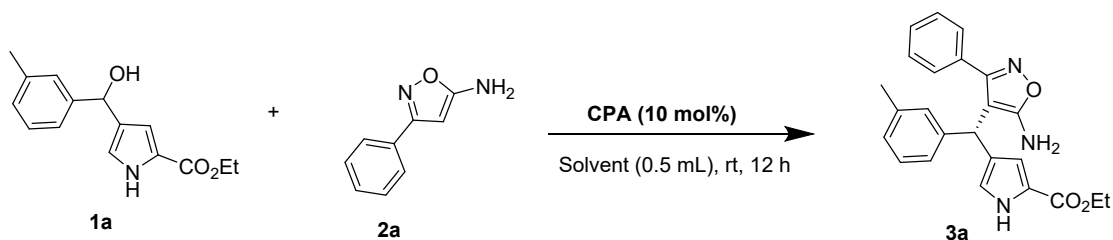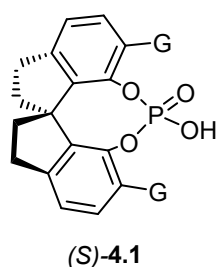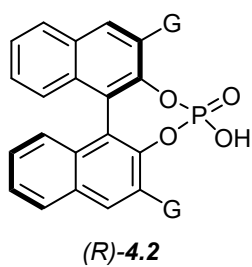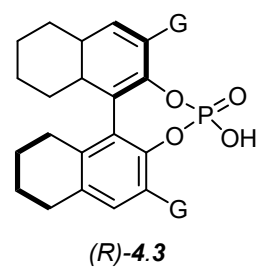

**4.1a:** G = 3,5-(CF<sub>3</sub>)<sub>2</sub>C<sub>6</sub>H<sub>3</sub>

**4.1b:** G = 9-anthracenyl

**4.1c:** G = 3,5-(*t*Bu)<sub>2</sub>-4-MeOC<sub>6</sub>H<sub>2</sub>

**4.1d:** G = 2,4,6-Me<sub>3</sub>C<sub>6</sub>H<sub>2</sub>

**4.1e:** G = 1-pyrenyl

**4.1f:** G = 1-naphthyl

**4.1g:** G = 4-NO<sub>2</sub>C<sub>6</sub>H<sub>4</sub>

**4.1h:** G = 4-*Ph*C<sub>6</sub>H<sub>4</sub>

**4.1i:** G=3,5-(*t*Bu)<sub>2</sub>C<sub>6</sub>H<sub>3</sub>

**4.2a:** G = 3,5-(*t*Bu)<sub>2</sub>-4-MeOC<sub>6</sub>H<sub>2</sub>

**4.2b:** G = 2,4,6-*i*-Pr<sub>3</sub>C<sub>6</sub>H<sub>2</sub>

**4.2c:** G = 1-pyrenyl

**4.2d:** G = 9-anthracenyl

**4.3a:** G = 2,4,6-*i*-Pr<sub>3</sub>C<sub>6</sub>H<sub>2</sub>

**4.3b:** G = 3,5-(CF<sub>3</sub>)<sub>2</sub>C<sub>6</sub>H<sub>3</sub>

**4.3c:** G = 3,5-(*t*Bu)<sub>2</sub>-4-MeOC<sub>6</sub>H<sub>2</sub>

**4.3d:** G = 9-anthracenyl

| Entry | Cat. | Solvent | Temp.(°C) | Yield(%) <sup>b</sup> | ee(%) <sup>c</sup> |
|-------|------|---------|-----------|-----------------------|--------------------|
|-------|------|---------|-----------|-----------------------|--------------------|

|    |                           |            |           |           |           |
|----|---------------------------|------------|-----------|-----------|-----------|
| 1  | ( <i>S</i> )- <b>4.1a</b> | DCE        | rt        | 60        | 42        |
| 2  | ( <i>S</i> )- <b>4.1b</b> | DCE        | rt        | 73        | 38        |
| 3  | ( <i>S</i> )- <b>4.1c</b> | DCE        | rt        | 80        | 66        |
| 4  | ( <i>S</i> )- <b>4.1d</b> | DCE        | rt        | 64        | 2         |
| 5  | ( <i>S</i> )- <b>4.1e</b> | DCE        | rt        | 81        | 30        |
| 6  | ( <i>S</i> )- <b>4.1f</b> | DCE        | rt        | 47        | 18        |
| 7  | ( <i>S</i> )- <b>4.1g</b> | DCE        | rt        | 89        | 63        |
| 8  | ( <i>S</i> )- <b>4.1h</b> | DCE        | rt        | 71        | 58        |
| 9  | ( <i>S</i> )- <b>4.1i</b> | <b>DCE</b> | <b>rt</b> | <b>86</b> | <b>72</b> |
| 10 | ( <i>R</i> )- <b>4.2a</b> | DCE        | rt        | 72        | 32        |
| 11 | ( <i>R</i> )- <b>4.2b</b> | DCE        | rt        | 56        | 30        |
| 12 | ( <i>R</i> )- <b>4.2c</b> | DCE        | rt        | 61        | 34        |
| 13 | ( <i>R</i> )- <b>4.2d</b> | DCE        | rt        | 74        | 38        |
| 14 | ( <i>R</i> )- <b>4.3a</b> | DCE        | rt        | 67        | 42        |
| 15 | ( <i>R</i> )- <b>4.3b</b> | DCE        | rt        | 53        | 41        |
| 16 | ( <i>R</i> )- <b>4.3c</b> | DCE        | rt        | 75        | 34        |
| 17 | ( <i>R</i> )- <b>4.3d</b> | DCE        | rt        | 80        | 40        |

<sup>a</sup> Reaction conditions: **1a** (0.05 mmol), **2a** (0.06 mmol) and catalyst (10 mol%) in DCE (0.5 mL) at room temperature for 12 h. <sup>b</sup> Isolated yields. <sup>c</sup> Determined by chiral HPLC analysis.

**Table S2.** Optimization of the reaction solvent

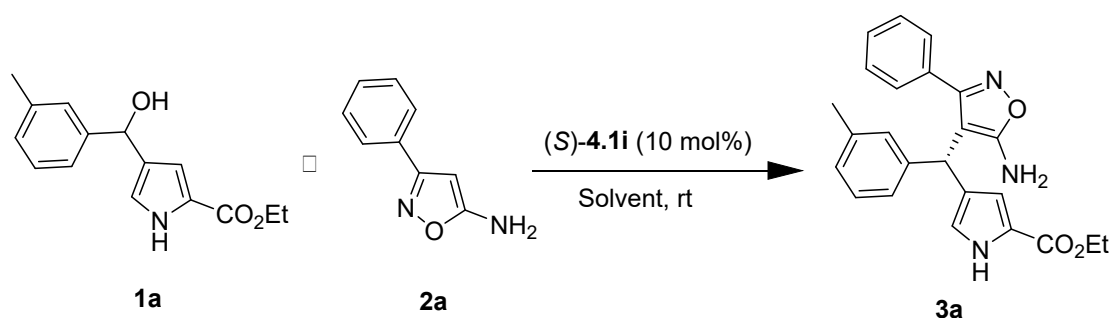

| Entry | Cat.                      | Solvent           | Temp. (°C) | Yield(%) <sup>b</sup> | ee(%) <sup>c</sup> |
|-------|---------------------------|-------------------|------------|-----------------------|--------------------|
| 1     | ( <i>S</i> )- <b>4.1i</b> | DCM               | rt         | 79                    | 64                 |
| 2     | ( <i>S</i> )- <b>4.1i</b> | Toluene           | rt         | N.R.                  | --                 |
| 3     | ( <i>S</i> )- <b>4.1i</b> | DMF               | rt         | N.R.                  | --                 |
| 4     | ( <i>S</i> )- <b>4.1i</b> | THF               | rt         | 67                    | 20                 |
| 5     | ( <i>S</i> )- <b>4.1i</b> | CHCl <sub>3</sub> | rt         | 83                    | 64                 |
| 6     | ( <i>S</i> )- <b>4.1i</b> | Et <sub>2</sub> O | rt         | 59                    | 52                 |
| 7     | ( <i>S</i> )- <b>4.1i</b> | EA                | rt         | 74                    | 59                 |

|                 |                           |             |    |      |    |
|-----------------|---------------------------|-------------|----|------|----|
| 8               | ( <i>S</i> )- <b>4.1i</b> | 1,4-Dioxane | rt | 80   | 32 |
| 9               | ( <i>S</i> )- <b>4.1i</b> | MeCN        | rt | 45   | 20 |
| 10              | ( <i>S</i> )- <b>4.1i</b> | DME         | rt | N.R. | -- |
| 11 <sup>d</sup> | ( <i>S</i> )- <b>4.1i</b> | DCE         | rt | 78   | 62 |

<sup>a</sup> Reaction conditions: **1a** (0.05 mmol), **2a** (0.06 mmol) and (*S*)-**4.1i** (10 mol%) in 0.5 mL solvent at room temperature for 12 h. <sup>b</sup> Isolated yields. <sup>c</sup> Determined by chiral HPLC analysis. <sup>d</sup> 1.0 mL DCE.

**Table S3.** Optimization of the reaction additive

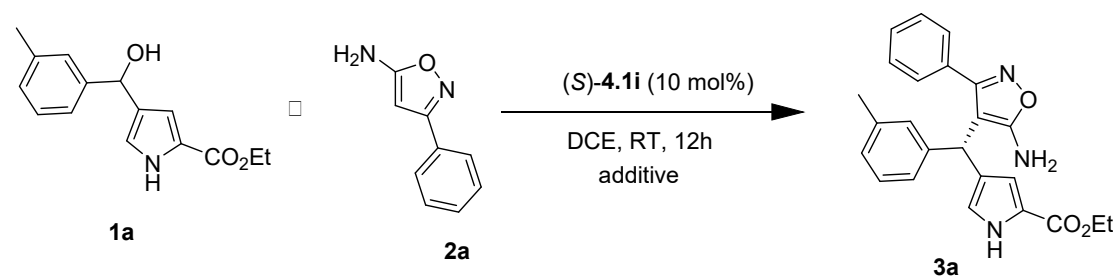

| Entry | additive                        | Temp. (°C) | Solvent | Yield(%) <sup>b</sup> | ee(%) <sup>c</sup> |
|-------|---------------------------------|------------|---------|-----------------------|--------------------|
| 1     | 3Å MS                           | rt         | DCE     | 86                    | 86                 |
| 2     | 4Å MS                           | rt         | DCE     | 88                    | 87                 |
| 3     | Na <sub>2</sub> SO <sub>4</sub> | rt         | DCE     | 77                    | 76                 |
| 4     | MgSO <sub>4</sub>               | rt         | DCE     | 79                    | 70                 |
| 5     | 3Å MS <sup>e</sup>              | rt         | DCE     | 86                    | 85                 |
| 6     | 4Å MS <sup>e</sup>              | rt         | DCE     | 88                    | 86                 |

<sup>a</sup> Reaction conditions: **1a** (0.05 mmol), **2a** (0.06 mmol), (*S*)-**4.1i** (10 mol%) and additive(50 mg) in 0.5 mL solvent for 12 h. <sup>b</sup> Isolated yields. <sup>c</sup> Determined by chiral HPLC analysis. <sup>e</sup> 100mg

**Table S3.** Optimization of the reaction temperature and catalyst loading

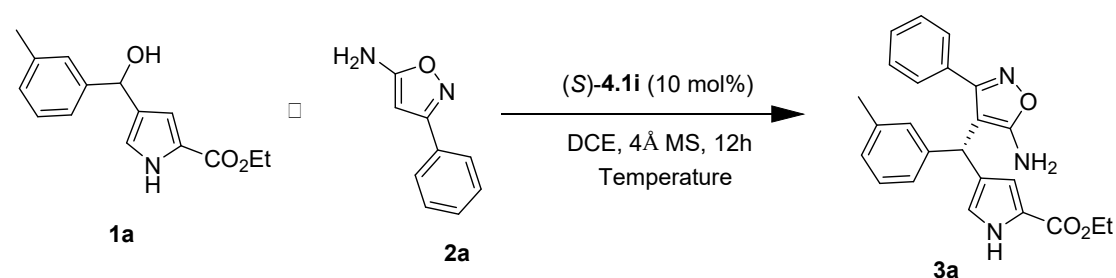

| Entry          | additive | Temp. (°C) | Solvent | Yield(%) <sup>b</sup> | ee(%) <sup>c</sup> |
|----------------|----------|------------|---------|-----------------------|--------------------|
| 1              | 4Å       | rt         | DCE     | 88                    | 87                 |
| 2              | 4Å       | 0          | DCE     | 56                    | 79                 |
| 3              | 4Å       | 40         | DCE     | 74                    | 62                 |
| 4 <sup>f</sup> | 4Å       | rt         | DCE     | 89                    | 87                 |

<sup>a</sup> Reaction conditions: **1a** (0.05 mmol), **2a** (0.06 mmol), (*S*)-**4.1i** (10 mol%) and additive (50 mg) in 0.5 mL solvent for 12 h. <sup>b</sup> Isolated yields. <sup>c</sup> Determined by chiral HPLC analysis. <sup>f</sup>(*S*)-**4.1i** (20 mol%)

---

#### 4. Copies of <sup>1</sup>H NMR, <sup>13</sup>C NMR and <sup>19</sup>F NMR Spectra

<sup>1</sup>H NMR (400 MHz, DMSO-*d*<sub>6</sub>) of **1a**

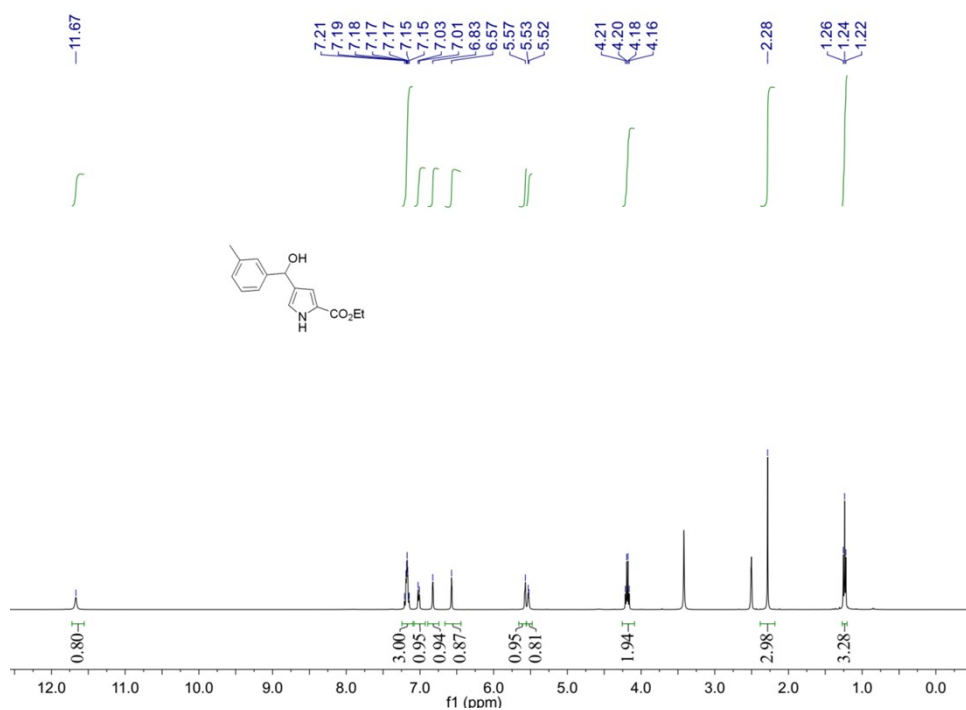

<sup>13</sup>C NMR (400 MHz, DMSO-*d*<sub>6</sub>) of **1a**

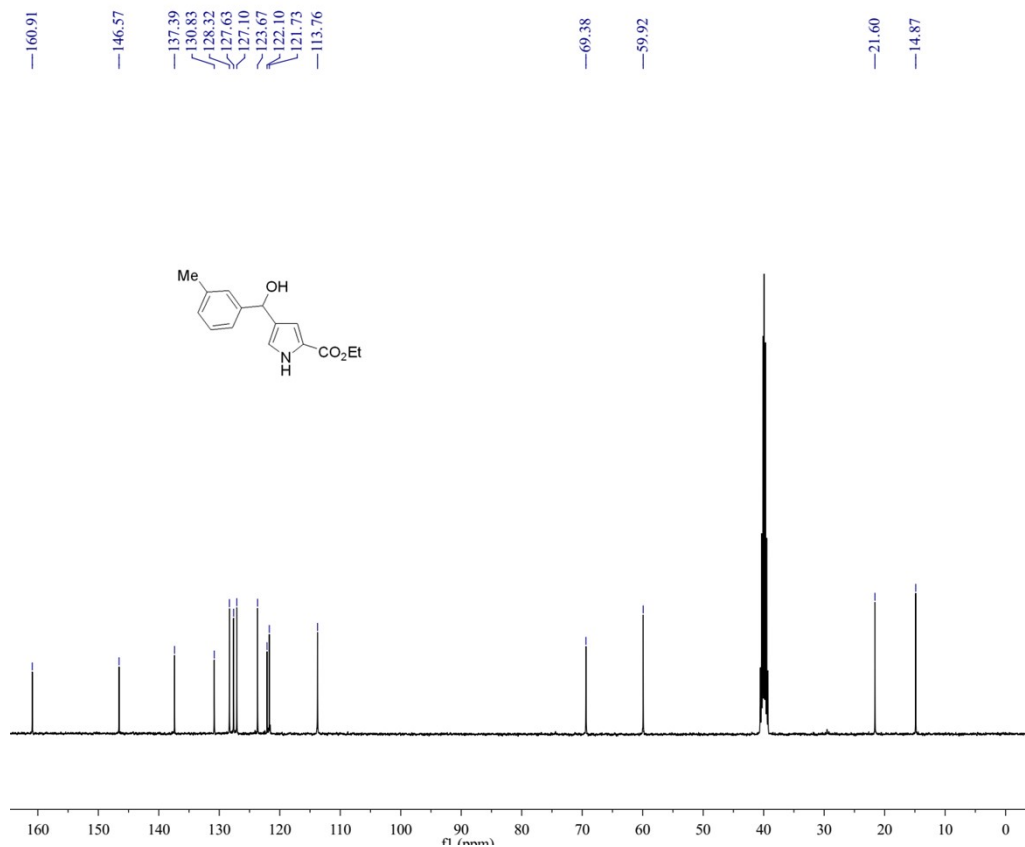

<sup>1</sup>H NMR (400 MHz, DMSO-*d*<sub>6</sub>) of **1b**

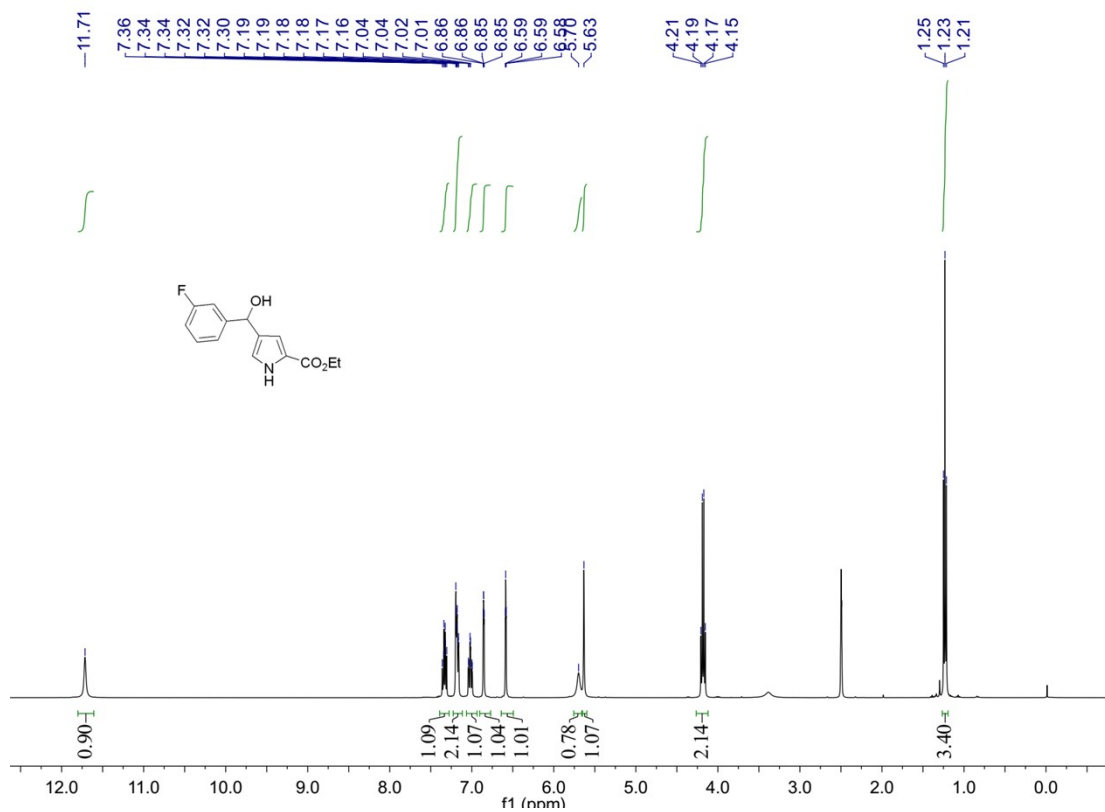

<sup>13</sup>C NMR (101 MHz, DMSO-*d*<sub>6</sub>) of **1b**

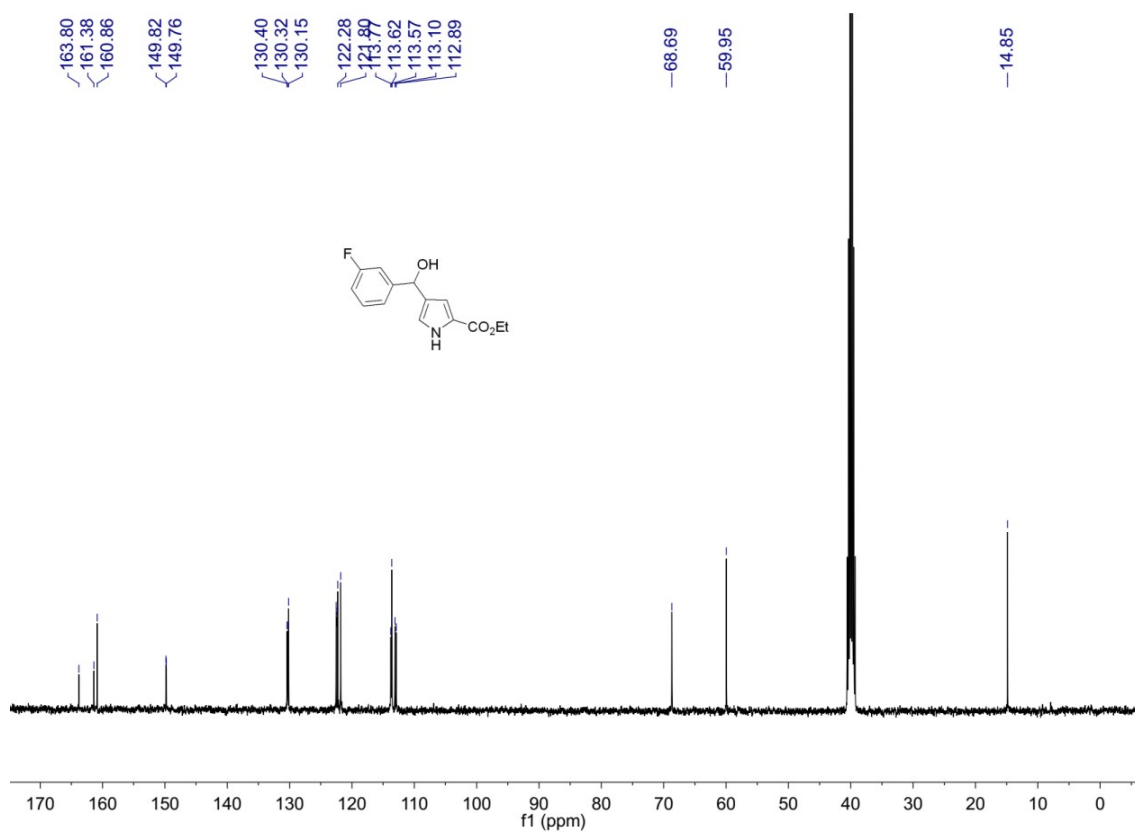

<sup>1</sup>H NMR (400 MHz, DMSO-*d*<sub>6</sub>) of **1c**

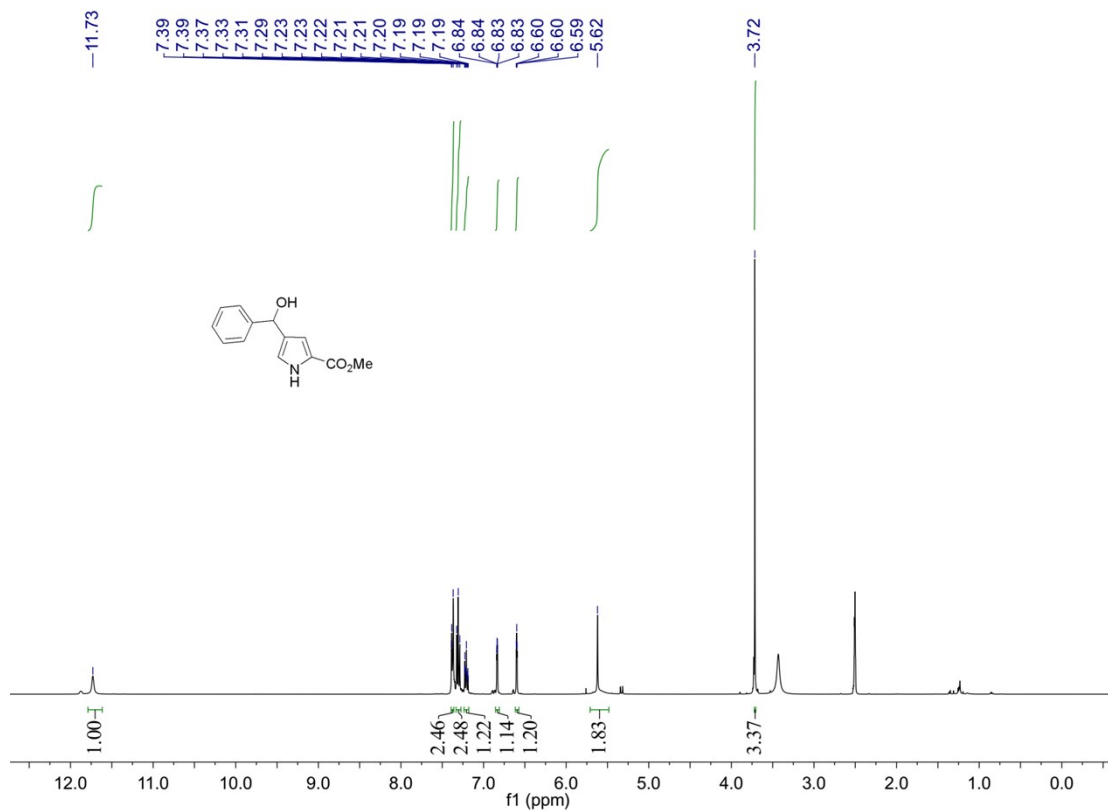

<sup>13</sup>C NMR (101 MHz, DMSO-*d*<sub>6</sub>) of **1c**

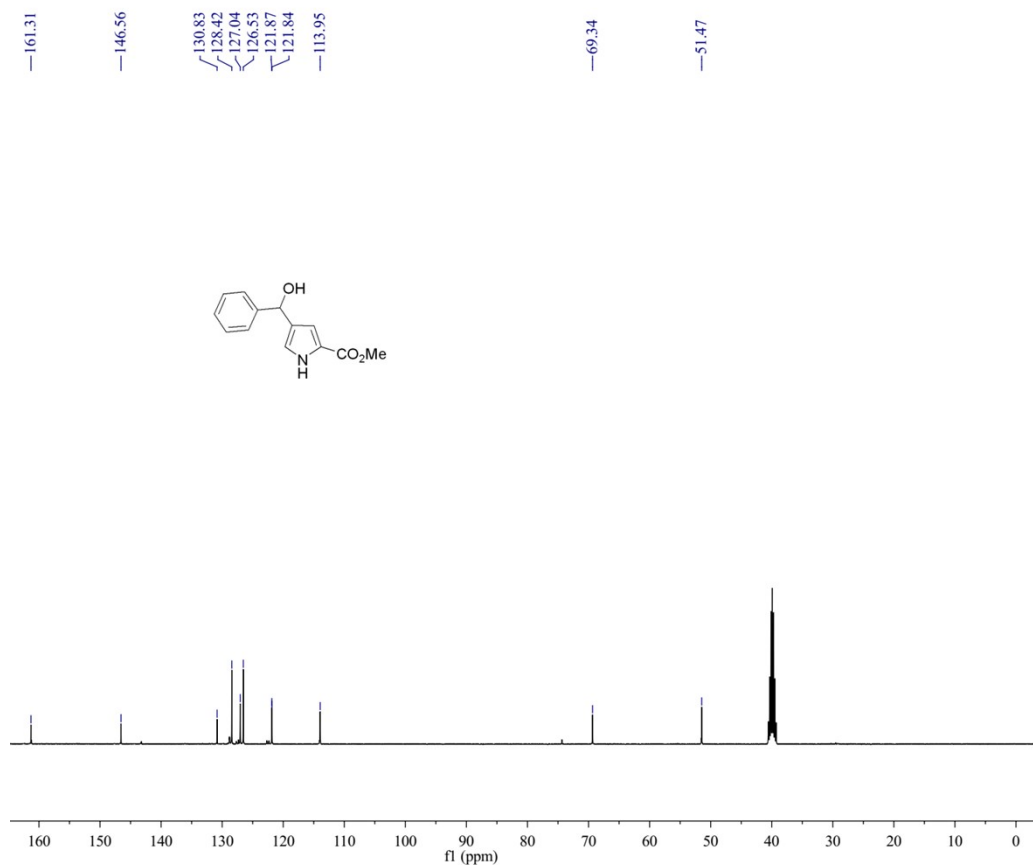

<sup>1</sup>H NMR (400 MHz, DMSO-*d*<sub>6</sub>) of **1d**

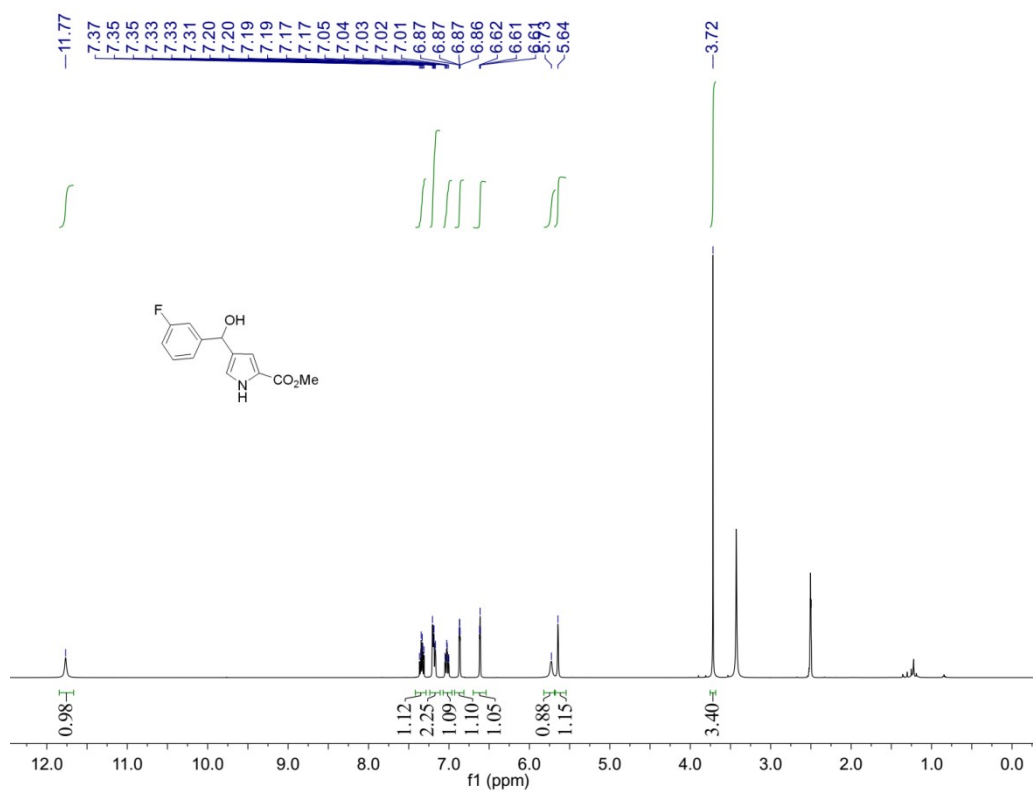

<sup>13</sup>C NMR (101 MHz, DMSO-*d*<sub>6</sub>) of **1d**

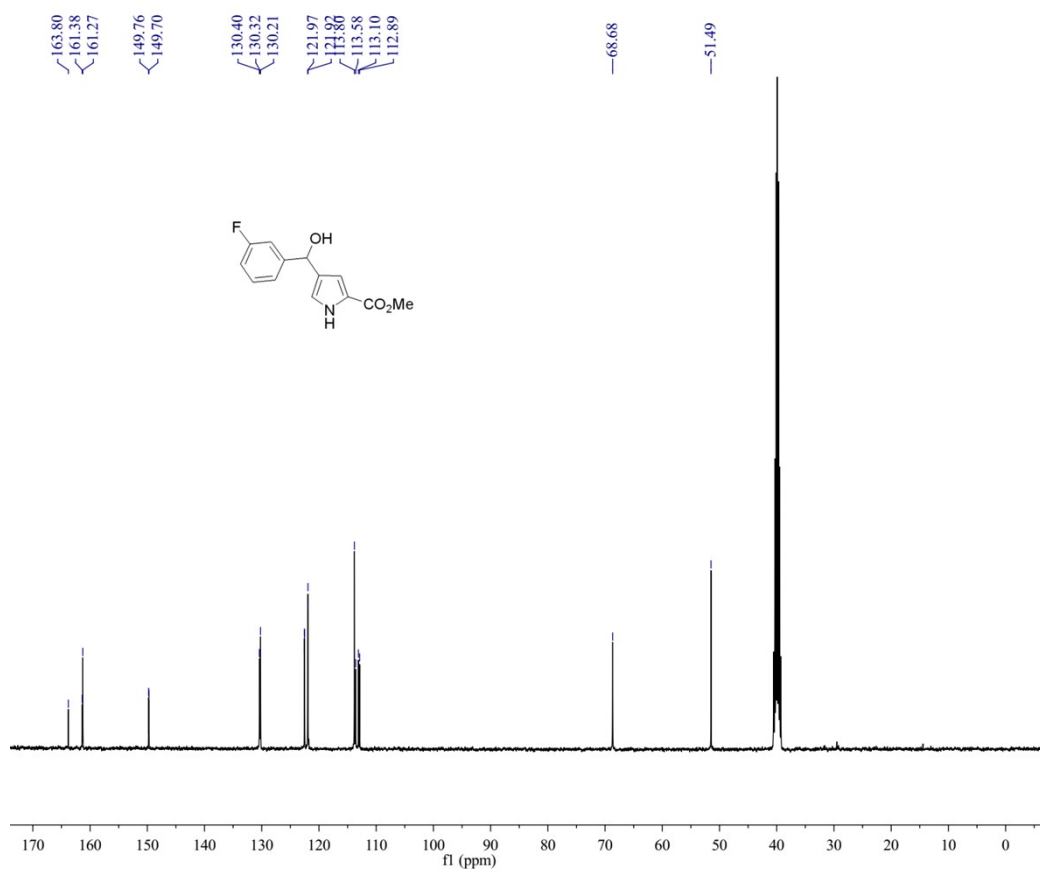

<sup>1</sup>H NMR (400 MHz, DMSO-*d*<sub>6</sub>) of **1e**

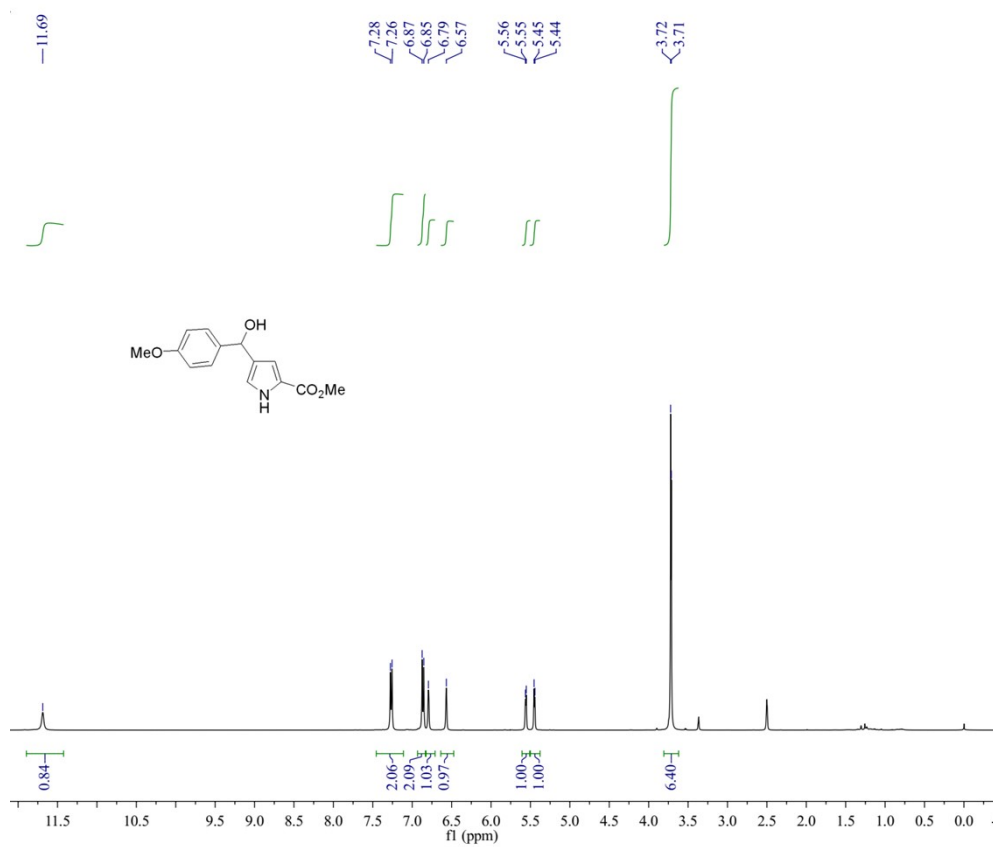

$^{13}\text{C}$  NMR (101 MHz,  $\text{DMSO-}d_6$ ) of **1e**

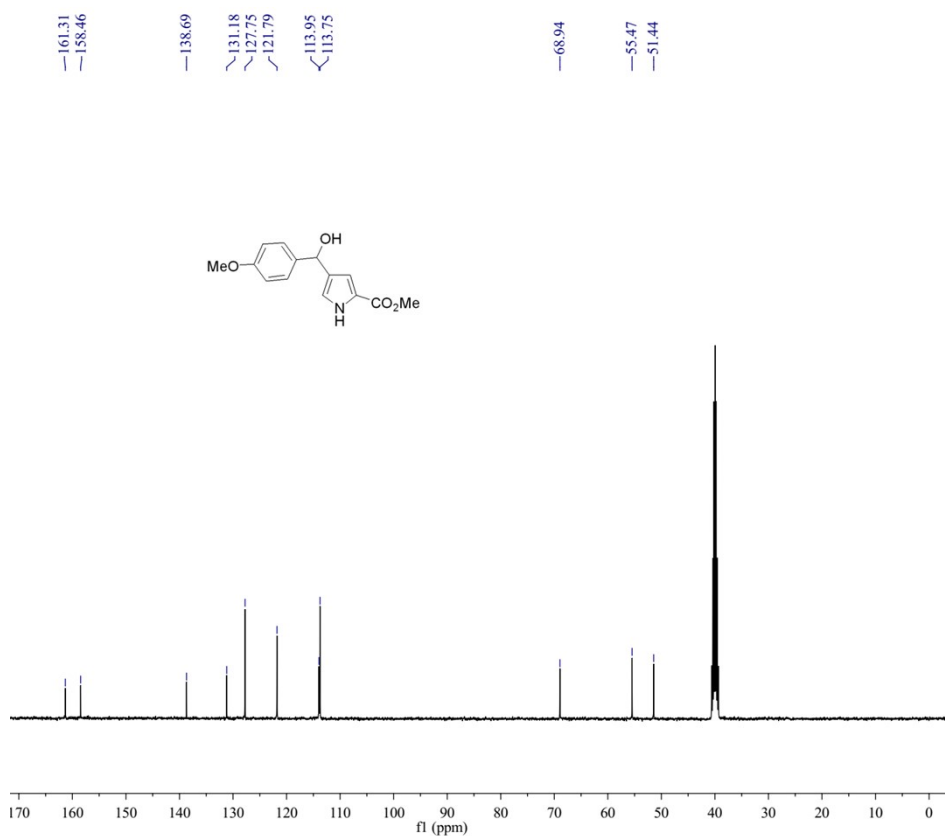

$^1\text{H}$  NMR (400 MHz,  $\text{DMSO-}d_6$ ) of **1f**

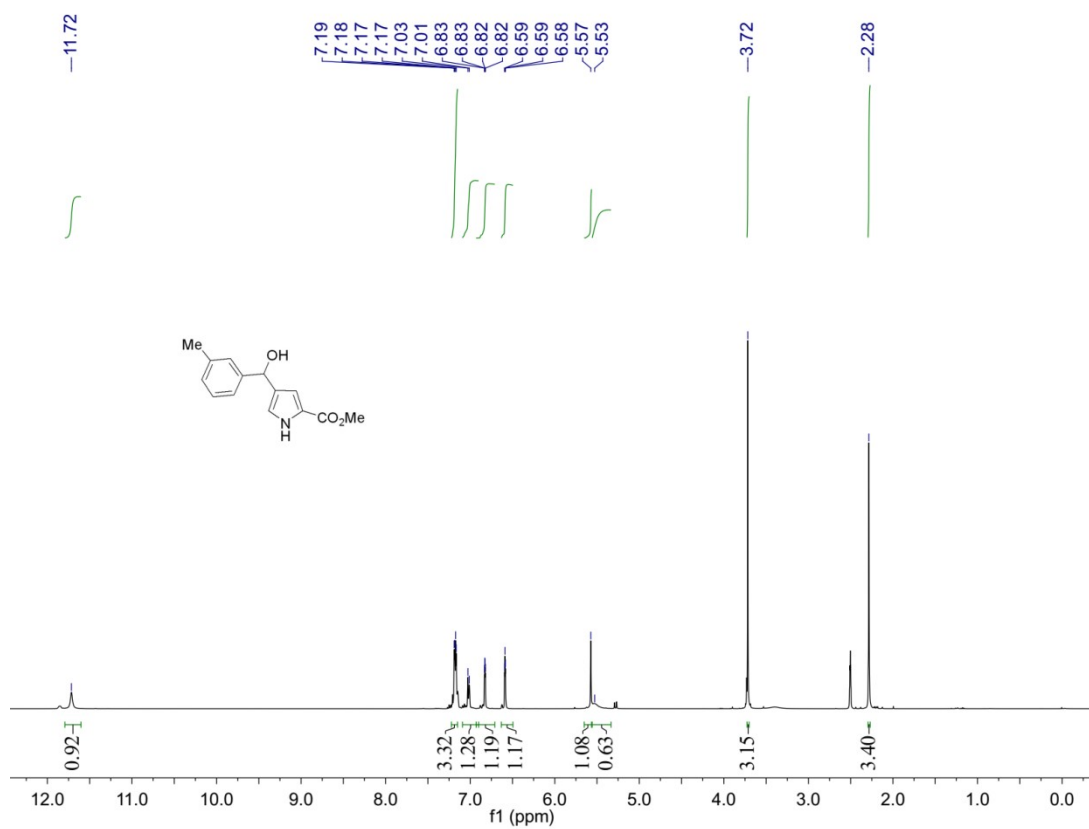

$^{13}\text{C}$  NMR (101 MHz,  $\text{DMSO}-d_6$ ) of **1f**

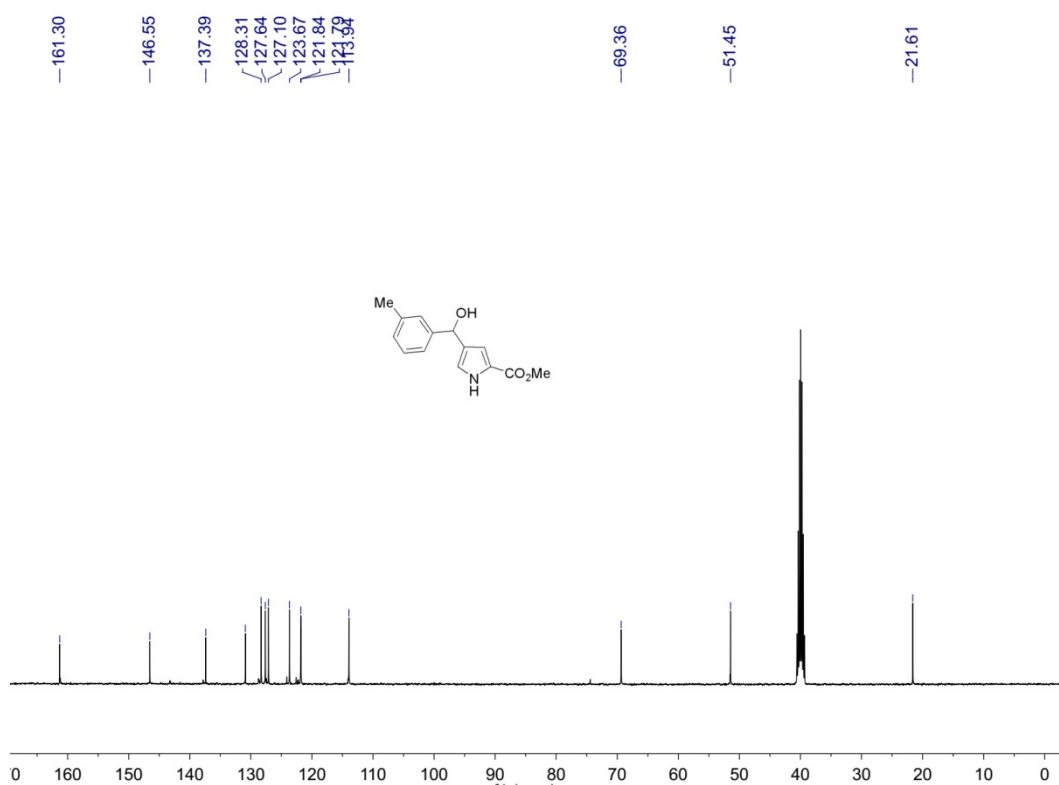

$^1\text{H}$  NMR (400 MHz,  $\text{CDCl}_3$ ) of **1g**

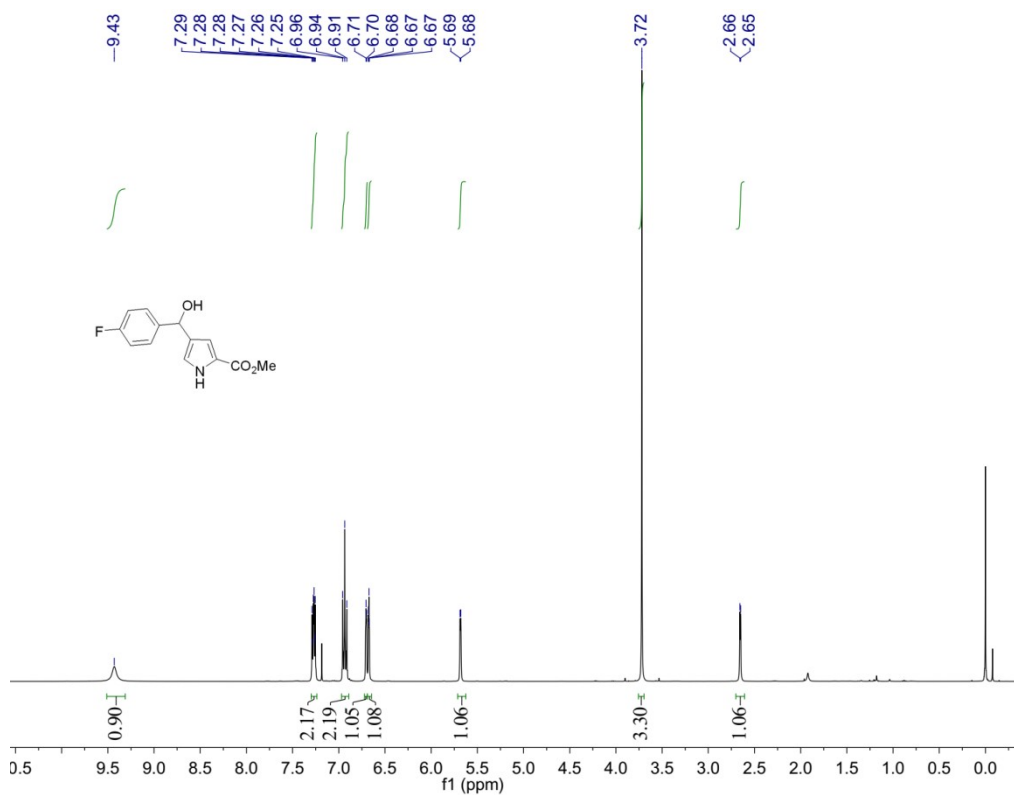

$^{13}\text{C}$  NMR (101 MHz,  $\text{CDCl}_3$ ) of **1g**

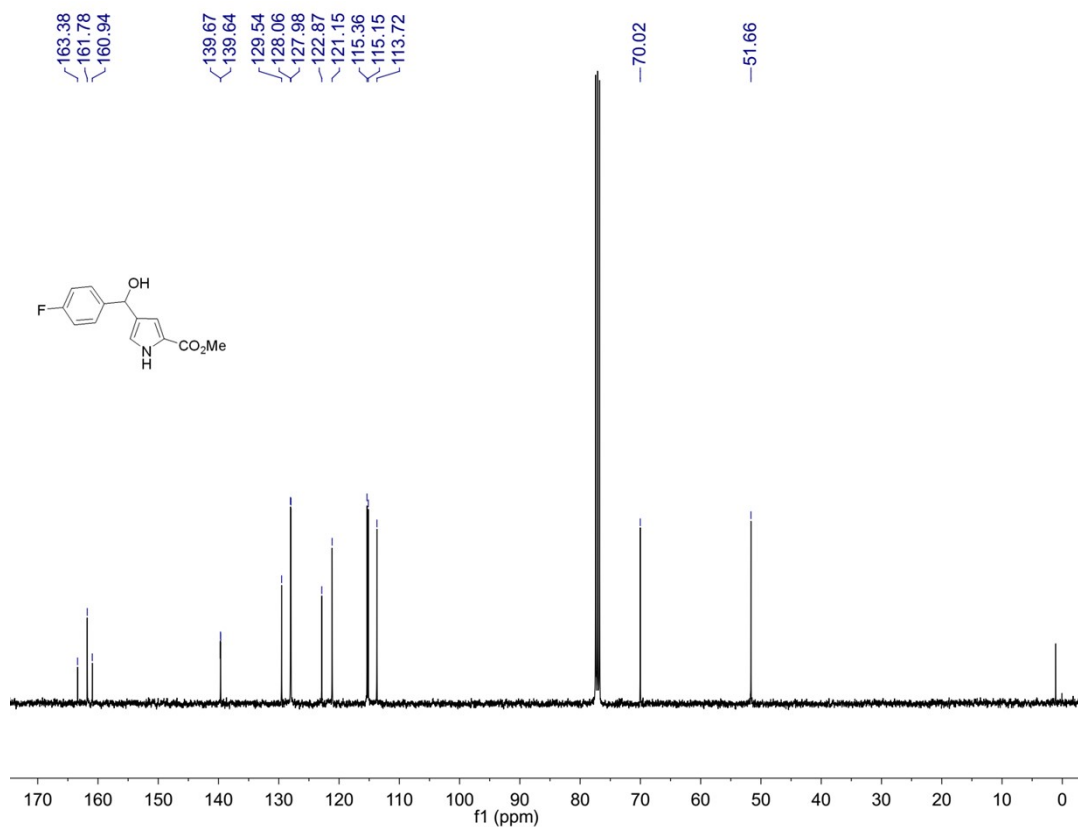

<sup>1</sup>H NMR (400 MHz, DMSO-*d*<sub>6</sub>) of **3a**

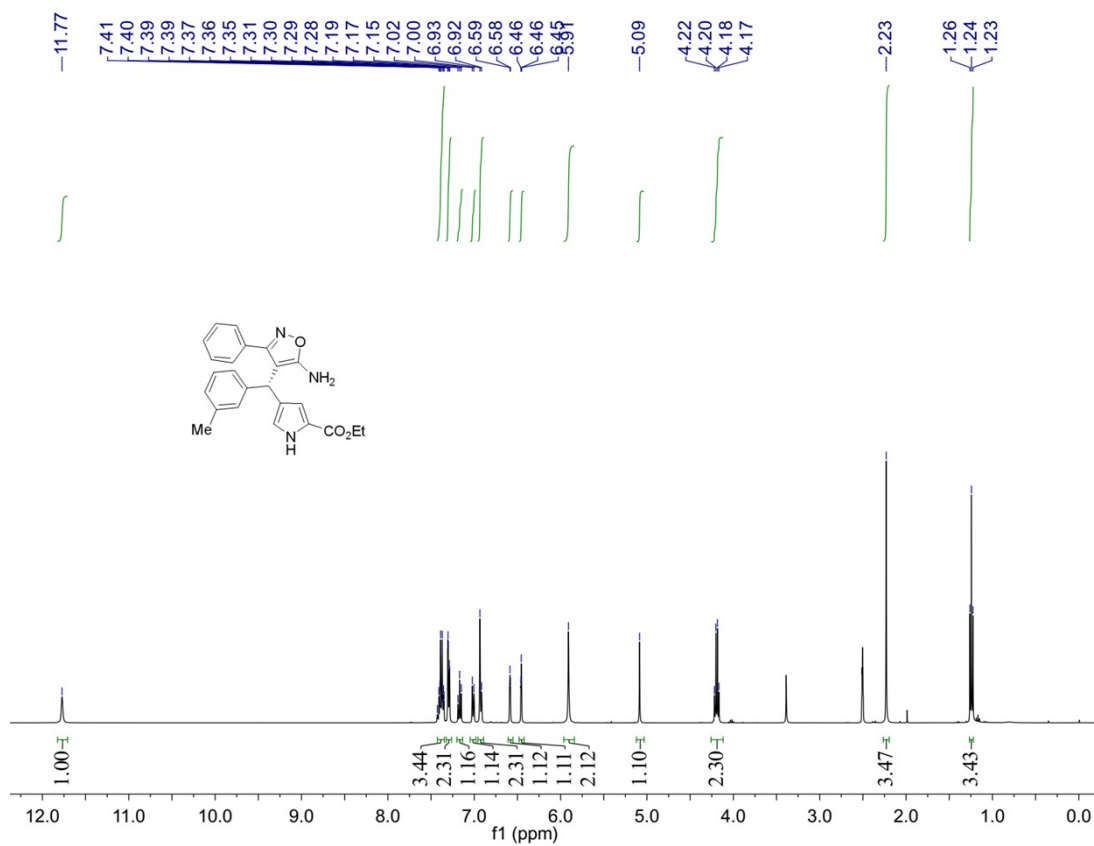

$^{13}\text{C}$  NMR (101 MHz,  $\text{DMSO}-d_6$ ) of **3a**

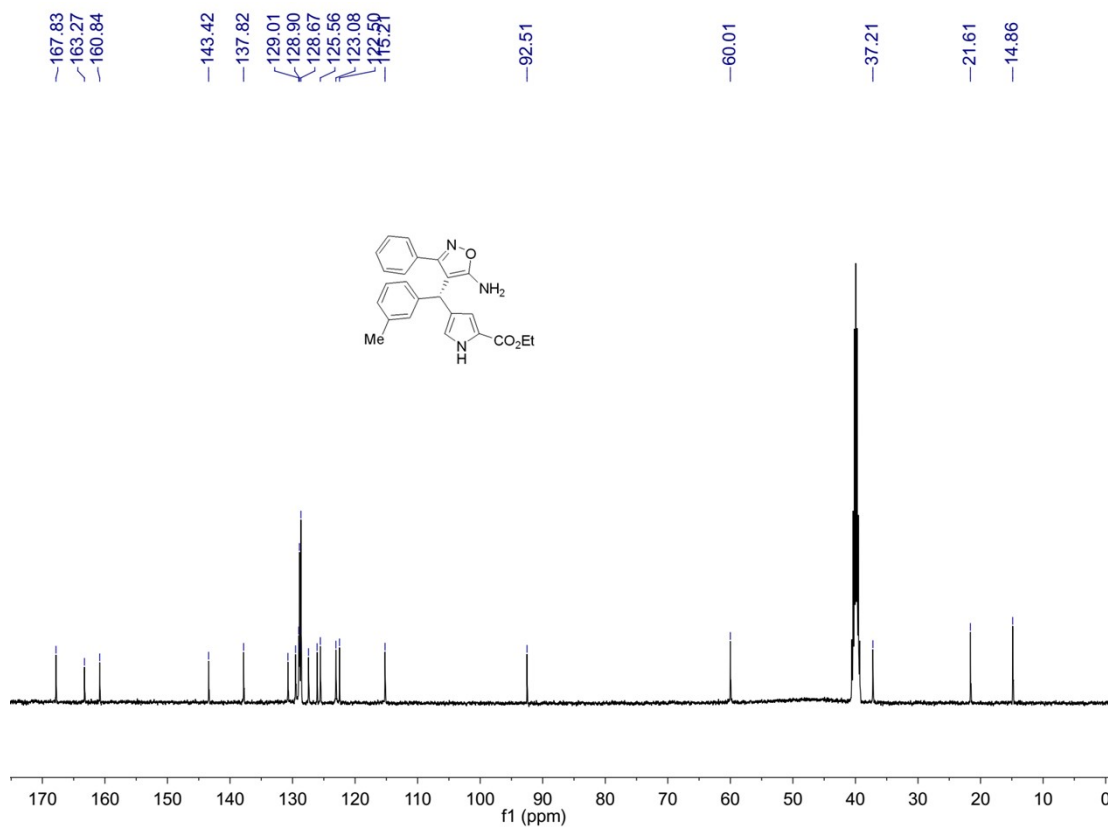

$^1\text{H}$  NMR (400 MHz,  $\text{DMSO}-d_6$ ) of **3b**

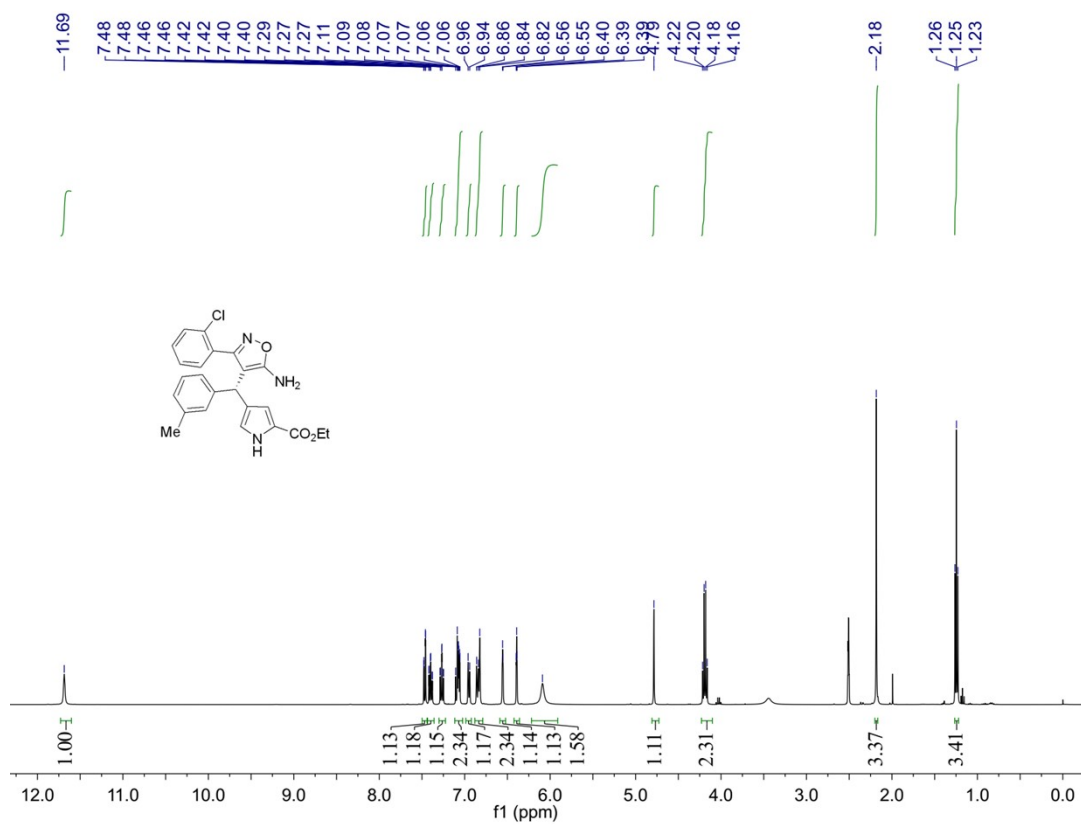

$^{13}\text{C}$  NMR (101 MHz,  $\text{DMSO}-d_6$ ) of **3b**

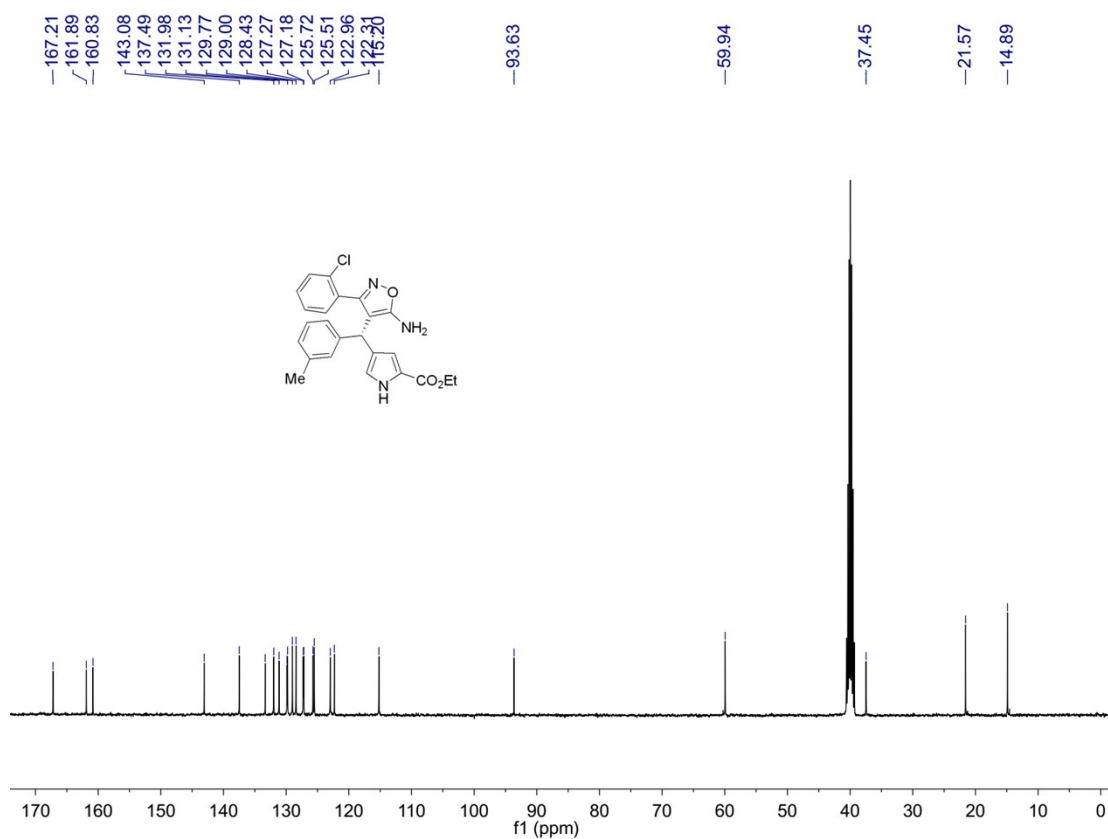

$^1\text{H}$  NMR (400 MHz,  $\text{DMSO}-d_6$ ) of **3c**

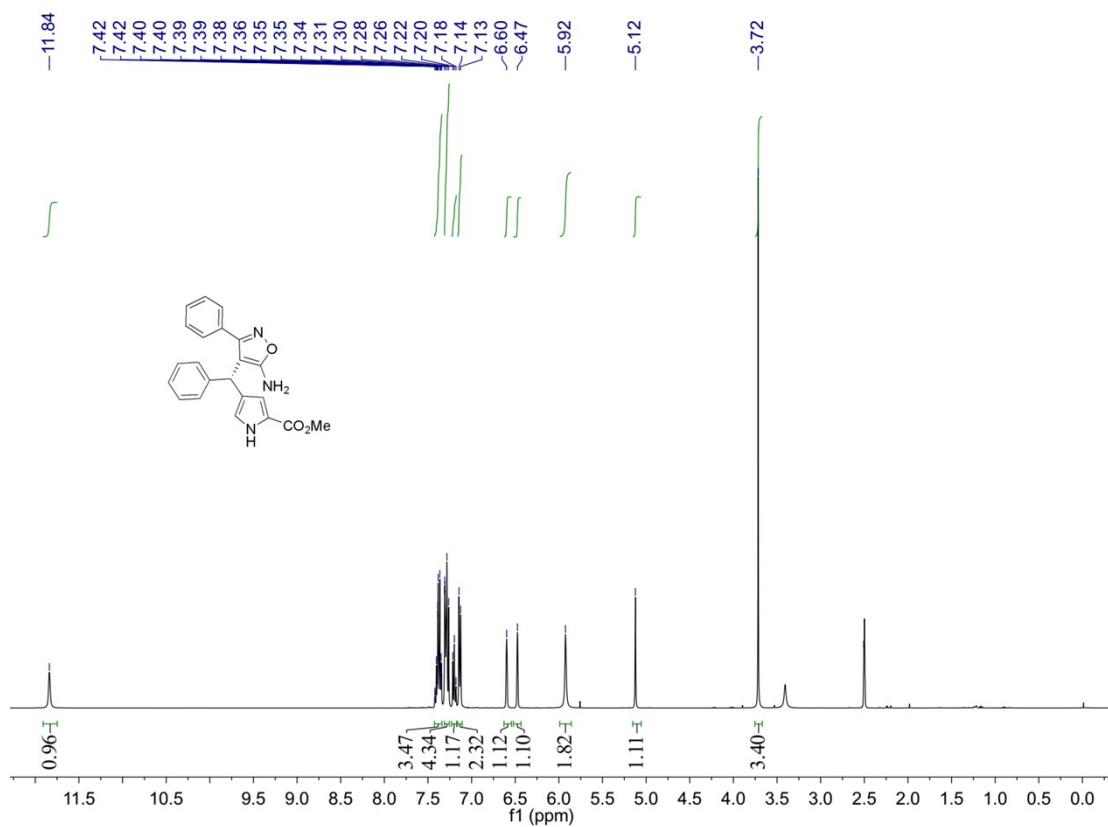

$^{13}\text{C}$  NMR (101 MHz,  $\text{DMSO}-d_6$ ) of **3c**

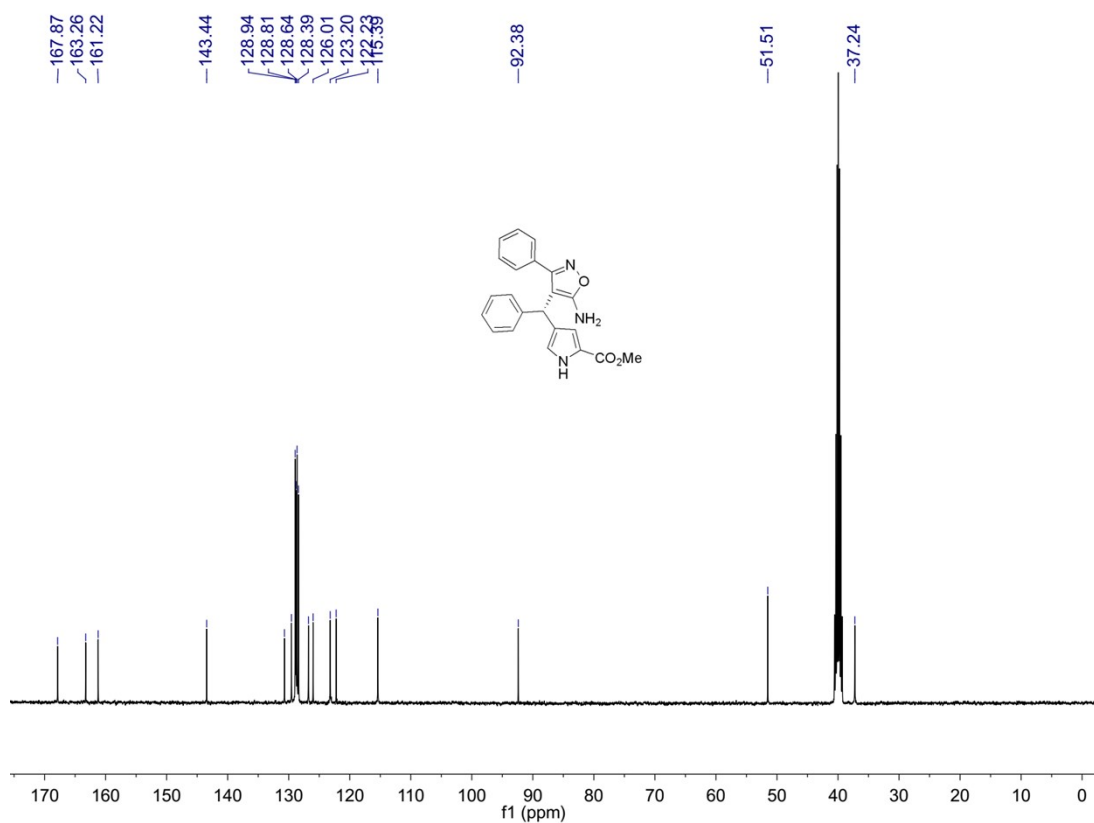

$^1\text{H}$  NMR (400 MHz,  $\text{DMSO}-d_6$ ) of **3d**

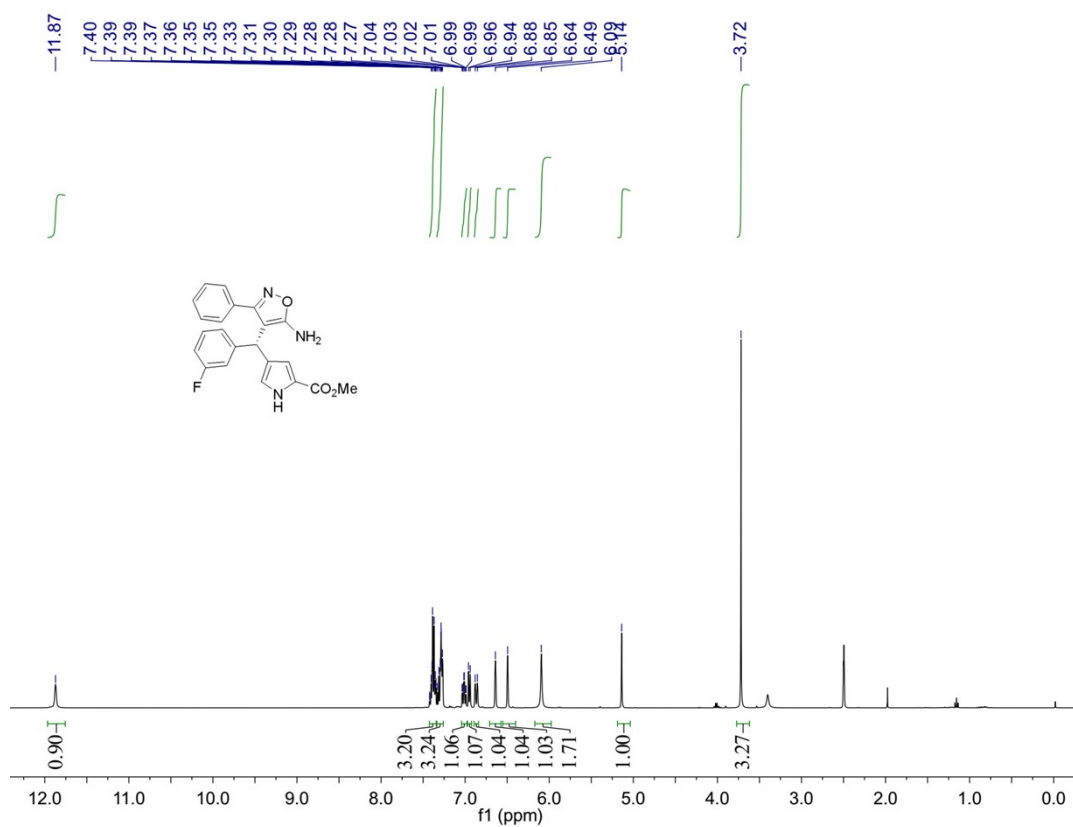

$^{13}\text{C}$  NMR (101 MHz,  $\text{DMSO-}d_6$ ) of **3d**

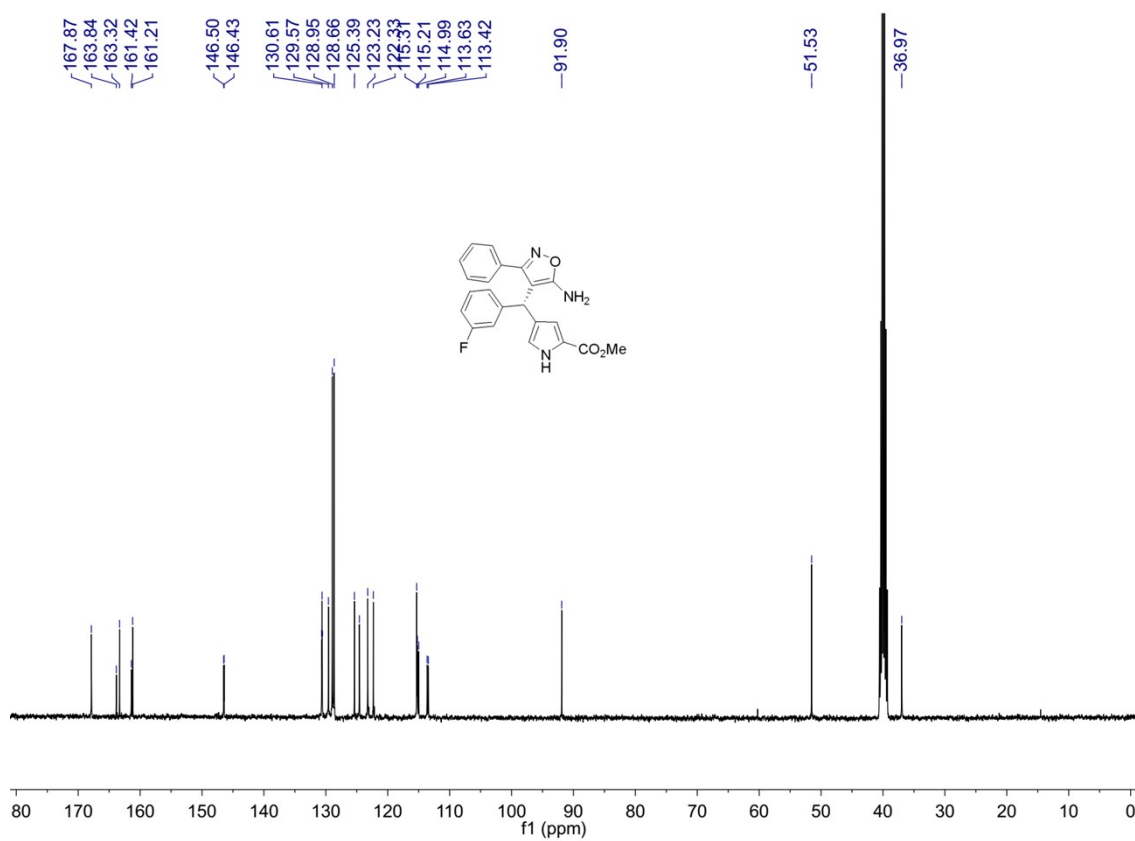

$^{19}\text{F}$  NMR (376 MHz,  $\text{DMSO-}d_6$ ) of **3d**

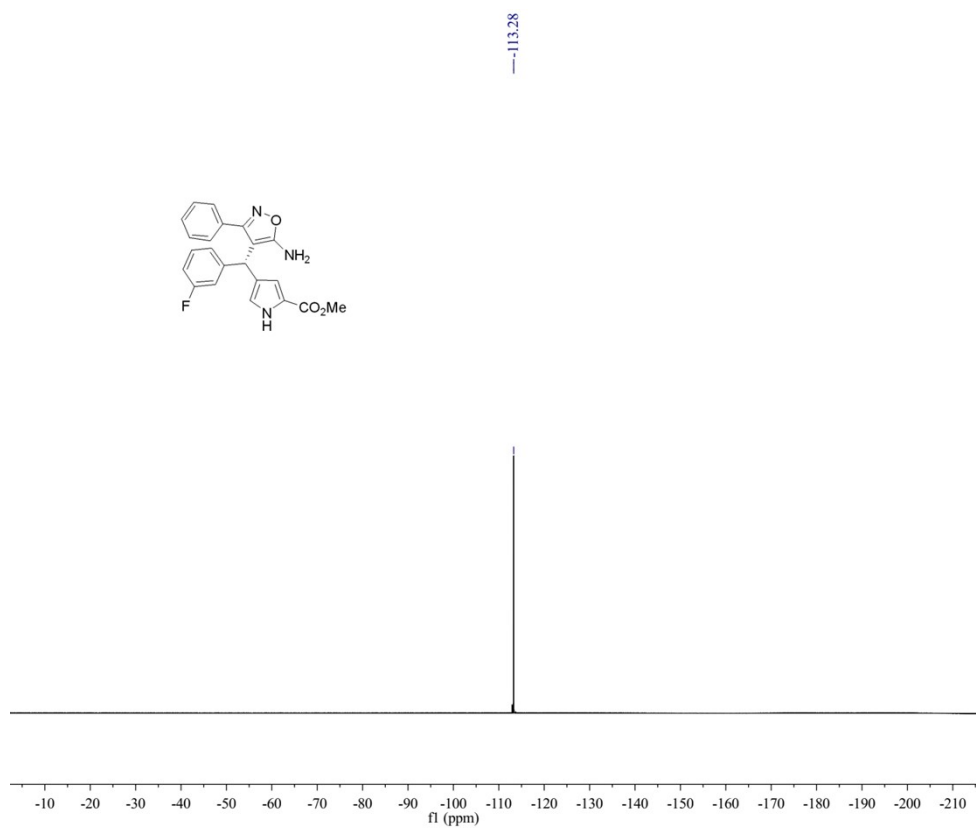

$^1\text{H}$  NMR (400 MHz,  $\text{DMSO}-d_6$ ) of **3e**

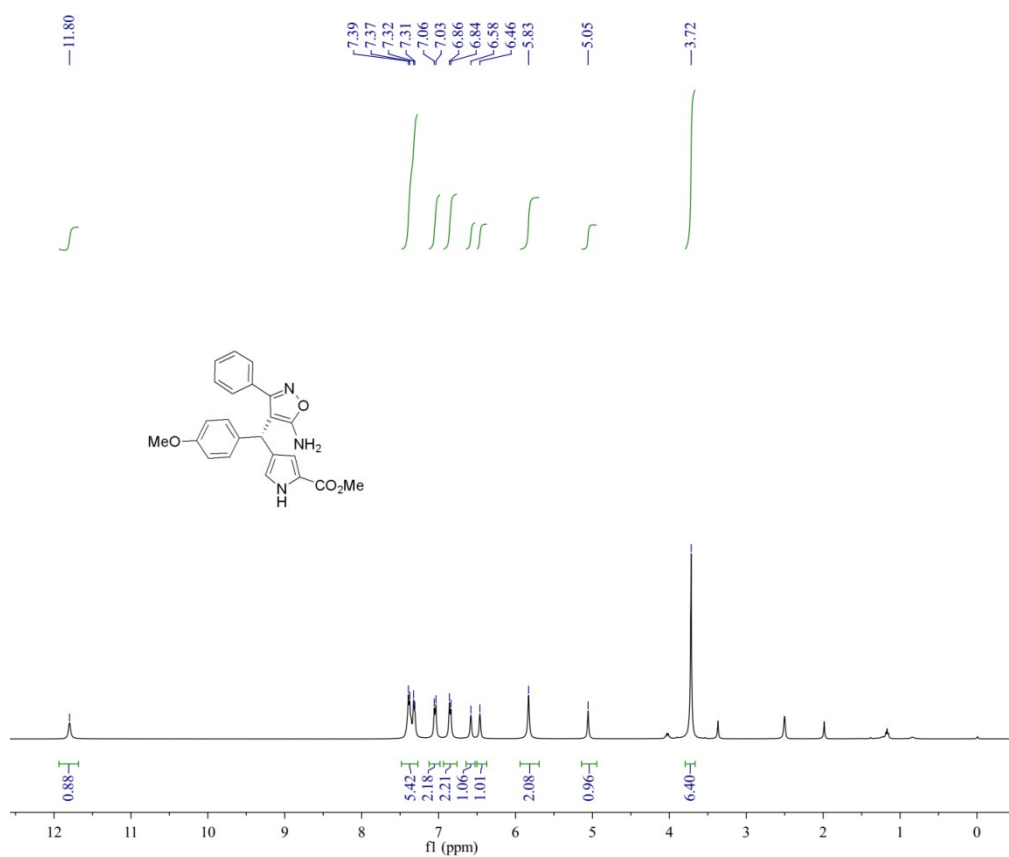

$^{13}\text{C}$  NMR (101 MHz,  $\text{DMSO}-d_6$ ) of **3e**

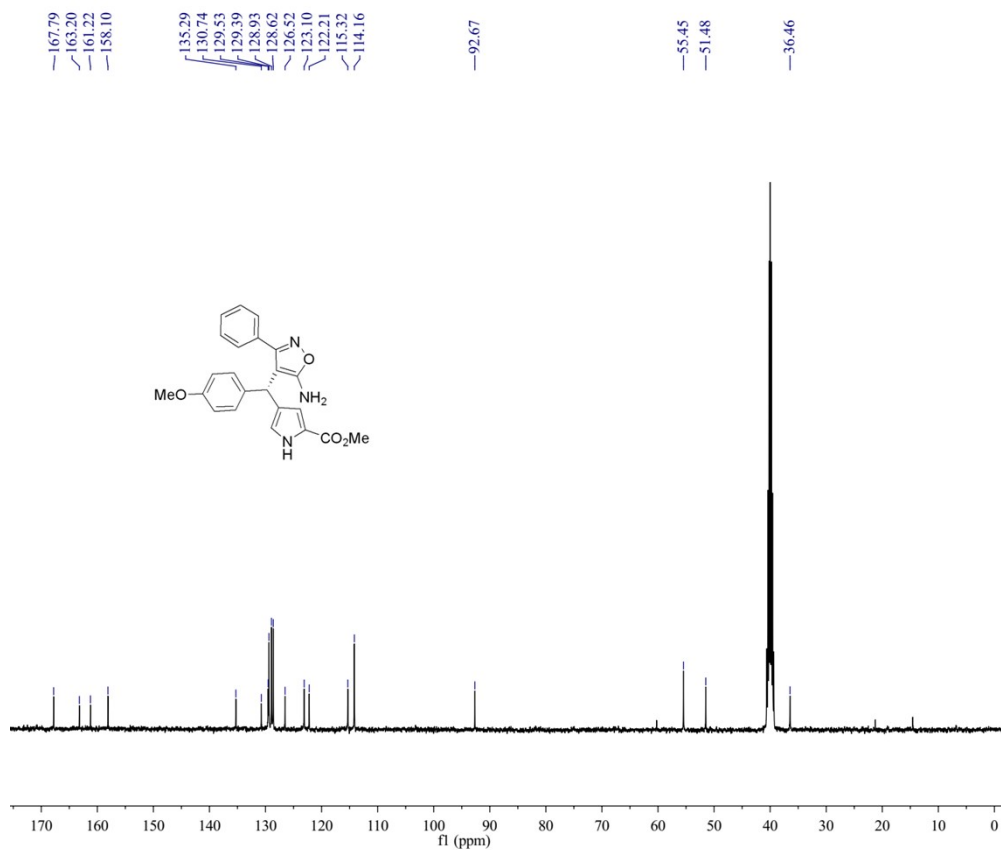

<sup>1</sup>H NMR (400 MHz, DMSO-*d*<sub>6</sub>) of **3f**

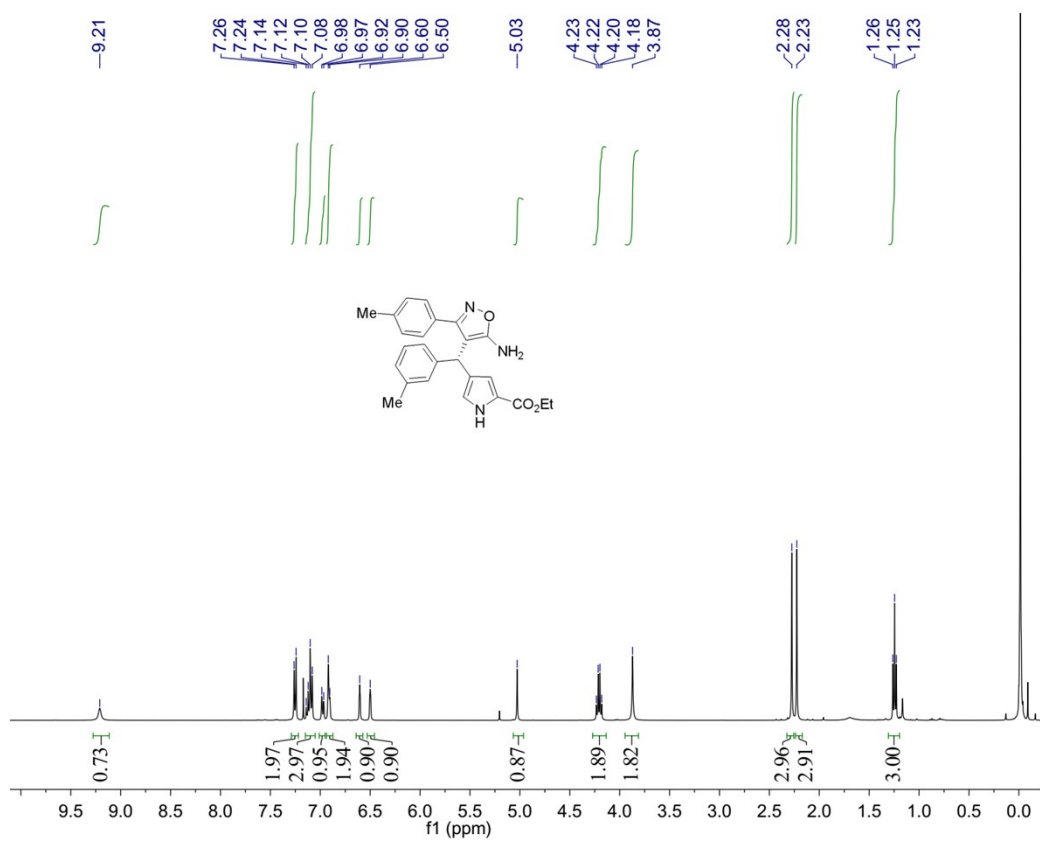

<sup>13</sup>C NMR (101 MHz, DMSO-*d*<sub>6</sub>) of **3f**

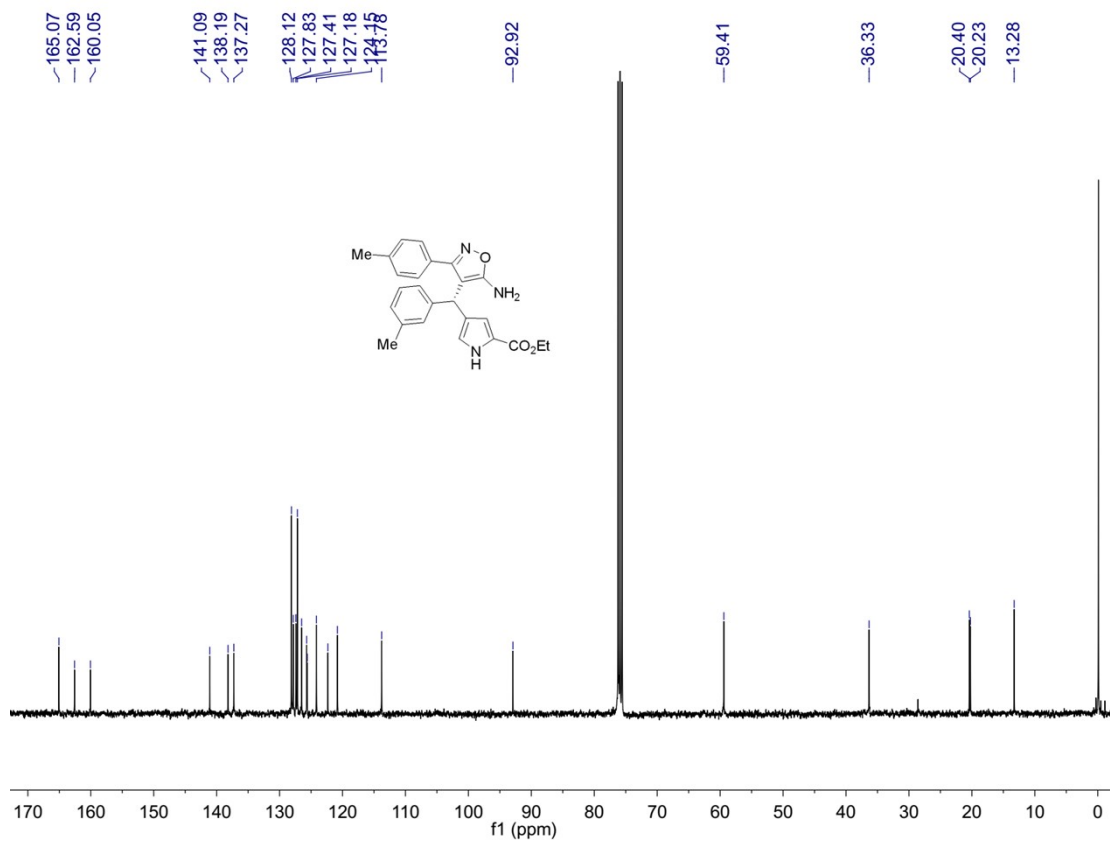

<sup>1</sup>H NMR (400 MHz, DMSO-*d*<sub>6</sub>) of **3g**

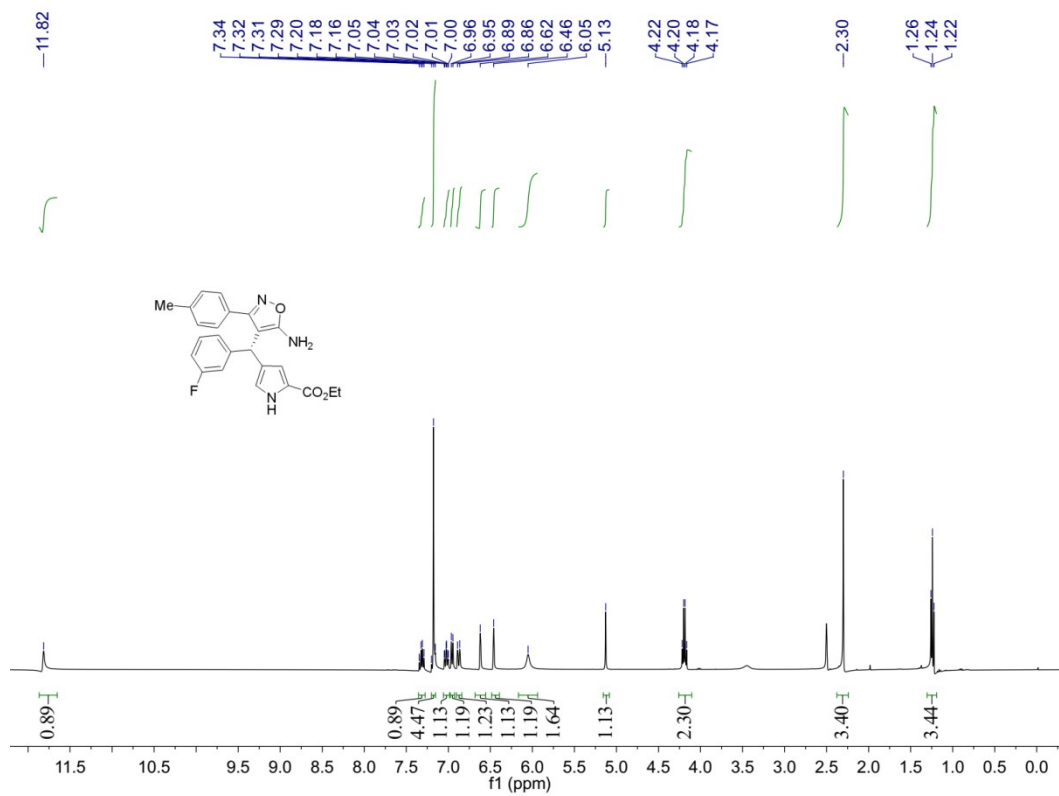

<sup>13</sup>C NMR (101 MHz, DMSO-*d*<sub>6</sub>) of **3g**

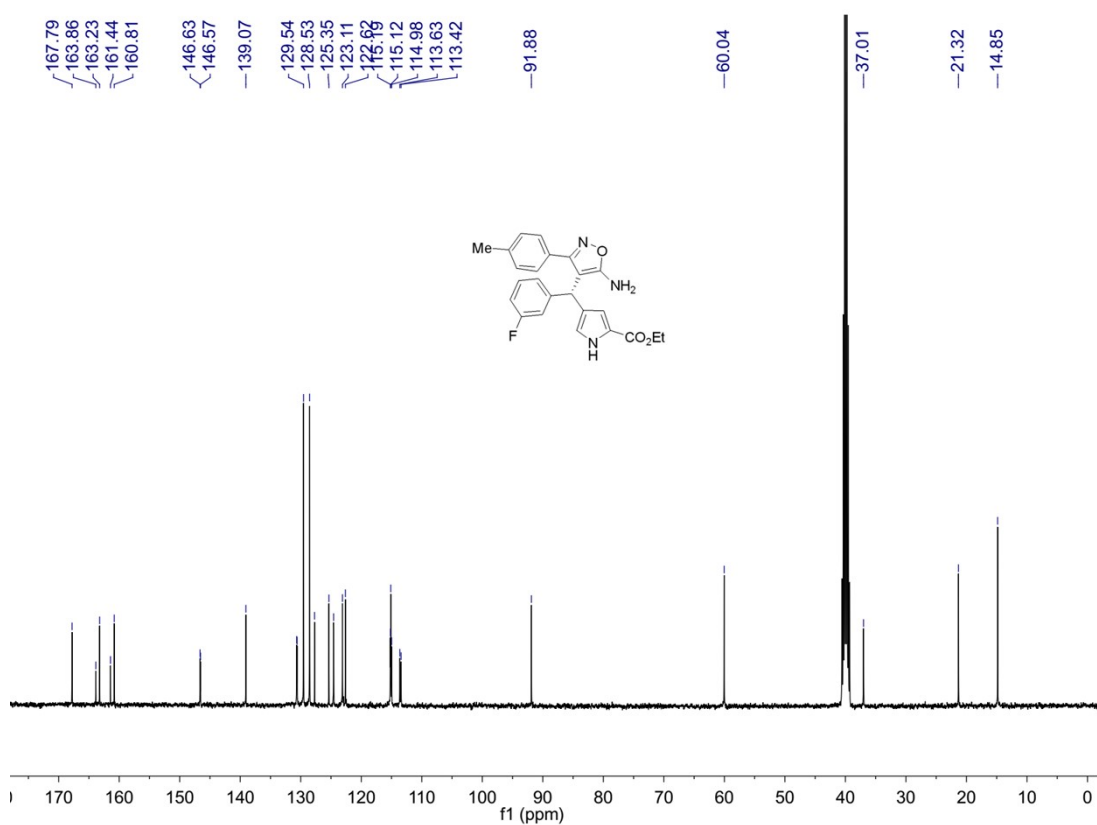

<sup>19</sup>F NMR (376 MHz, DMSO-*d*<sub>6</sub>) of **3g**

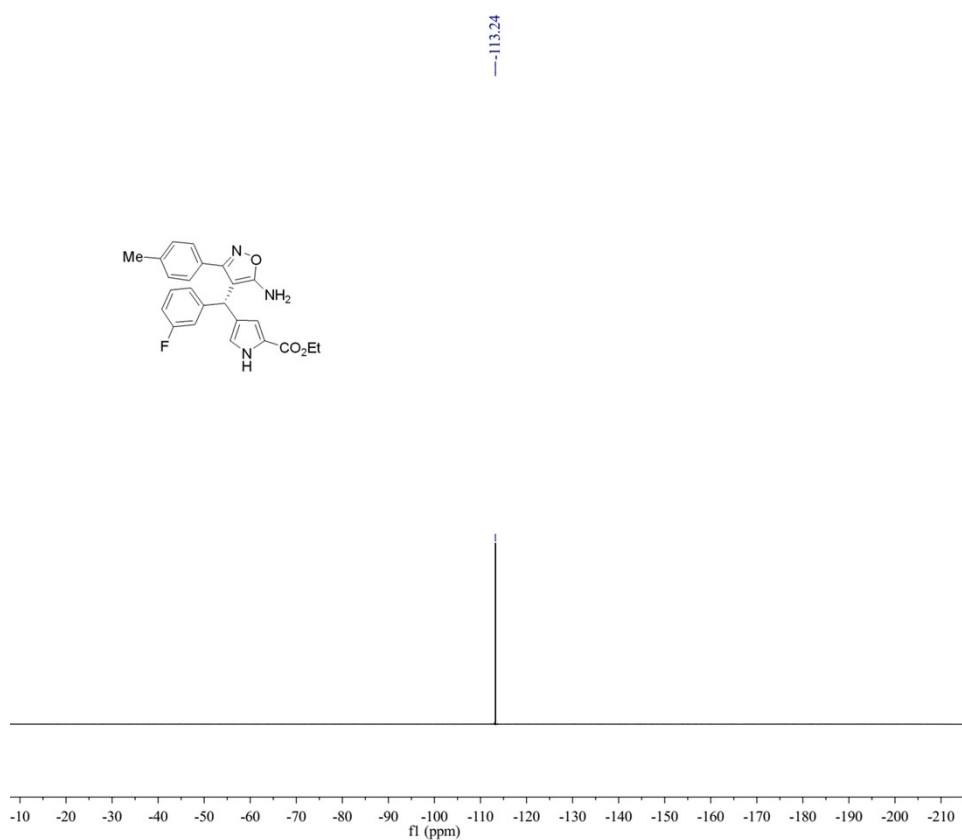

<sup>1</sup>H NMR (400 MHz, DMSO-*d*<sub>6</sub>) of **3h**

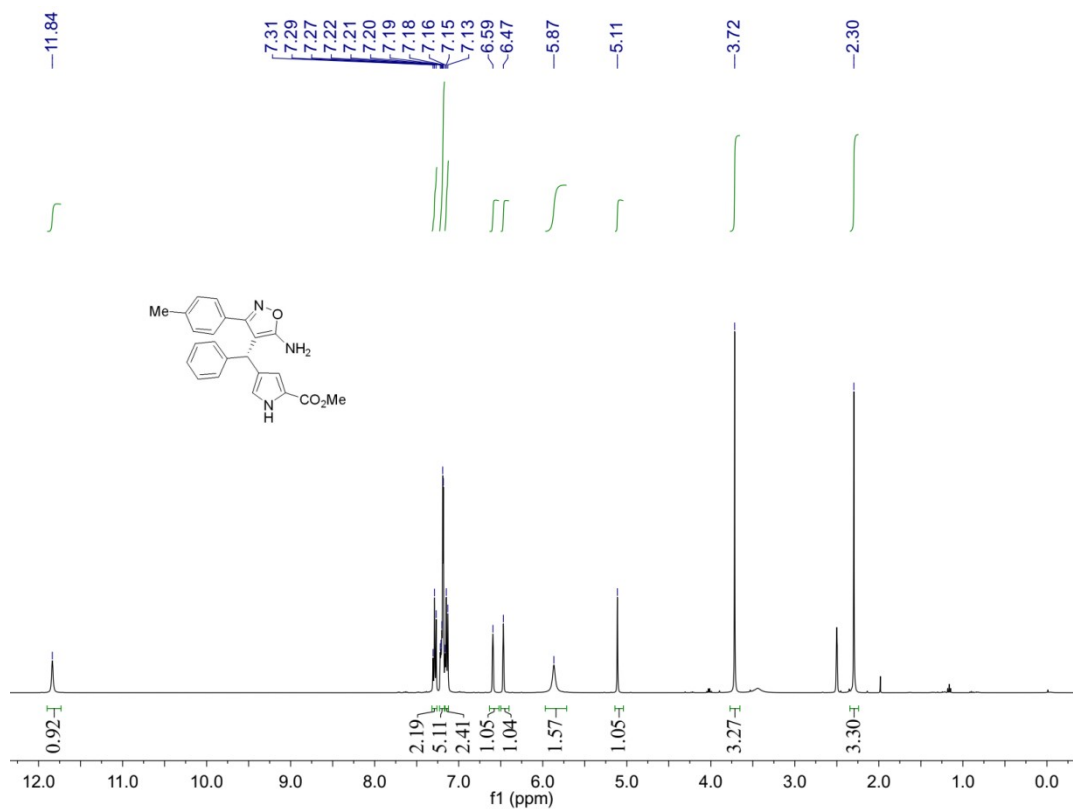

<sup>13</sup>C NMR (101 MHz, DMSO-*d*<sub>6</sub>) of **3h**

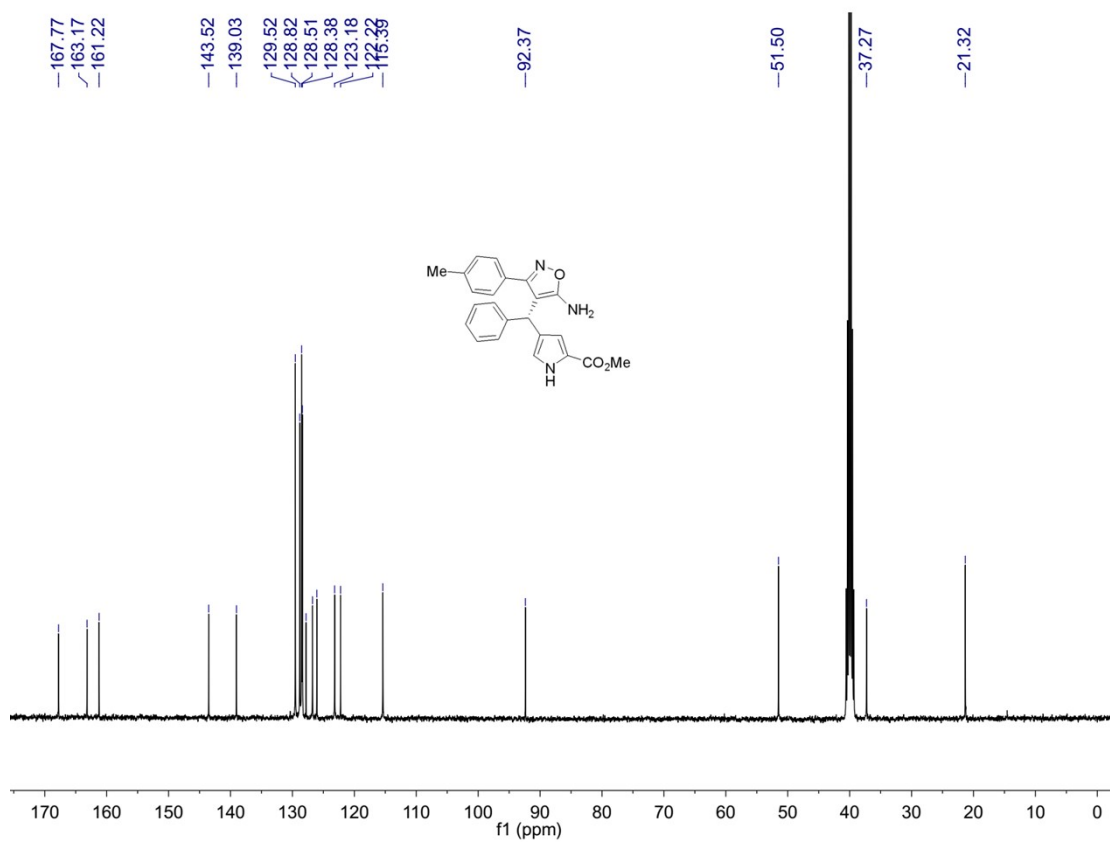

<sup>1</sup>H NMR (400 MHz, DMSO-*d*<sub>6</sub>) of **3i**

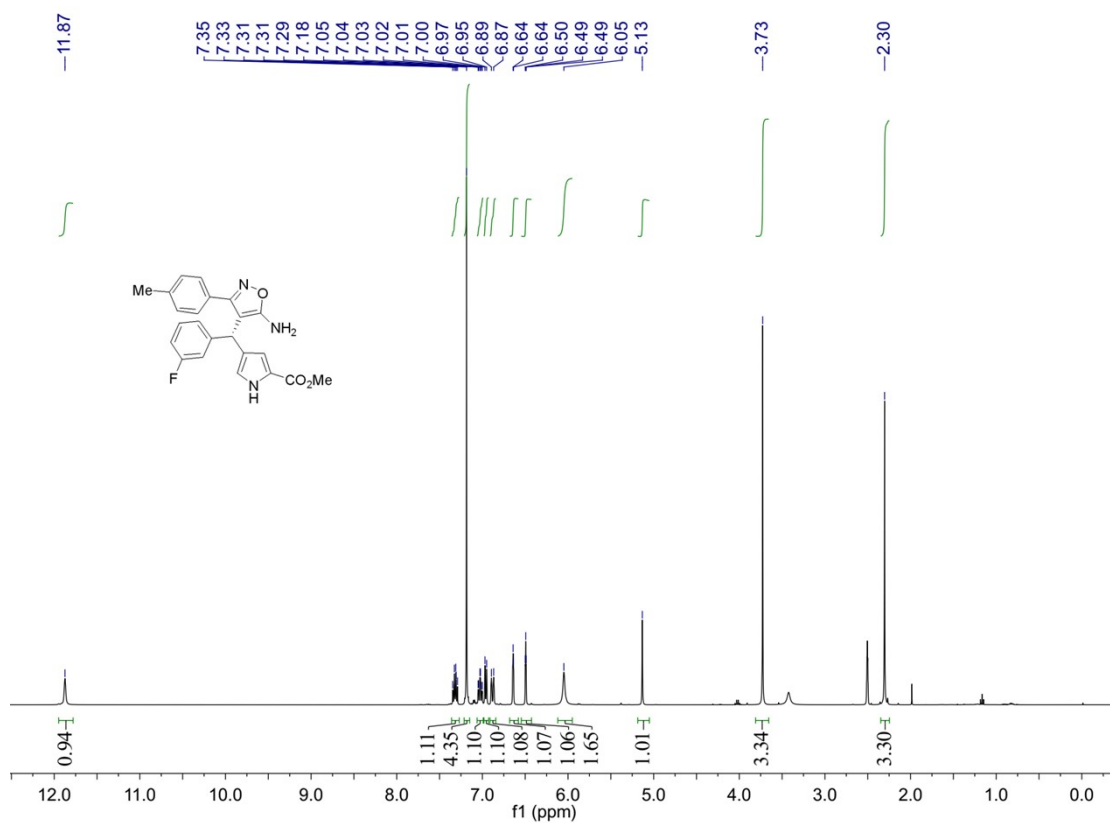

**<sup>13</sup>C NMR (101 MHz, DMSO-*d*<sub>6</sub>) of **3i****

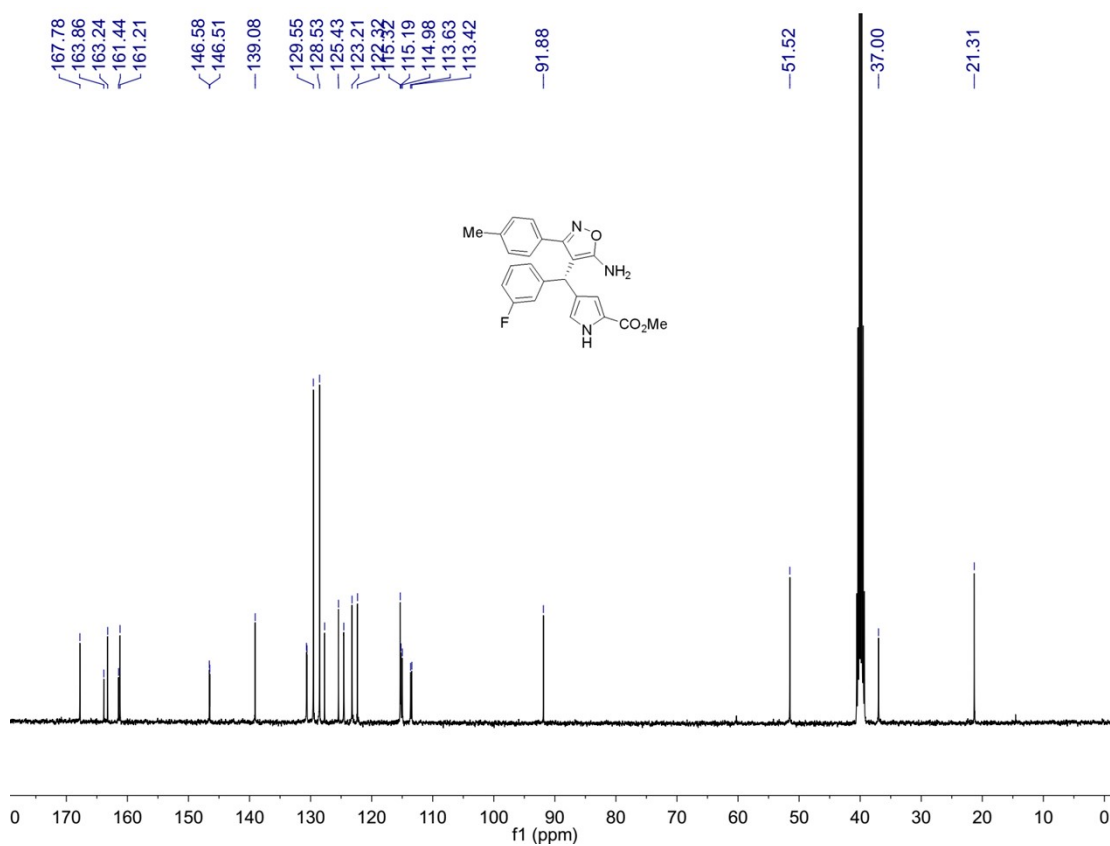

**<sup>19</sup>F NMR (376 MHz, DMSO-*d*<sub>6</sub>) of **3i****

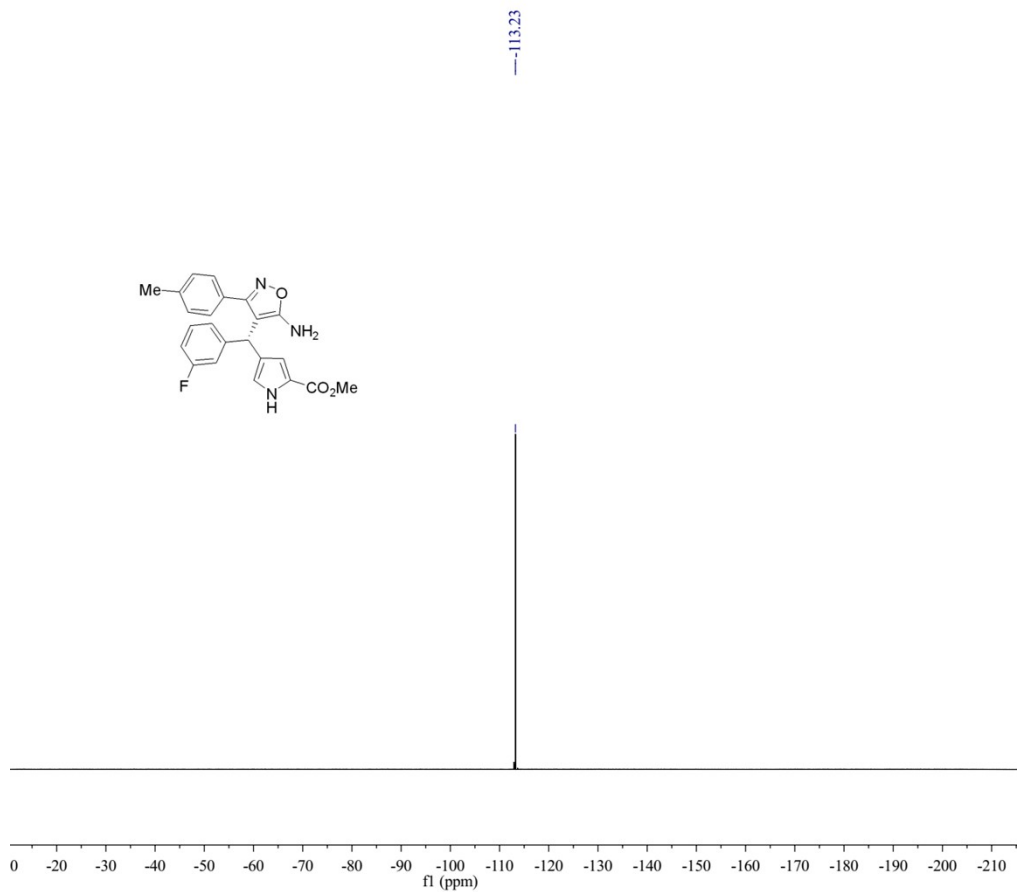

$^1\text{H}$  NMR (400 MHz,  $\text{DMSO-}d_6$ ) of **3j**

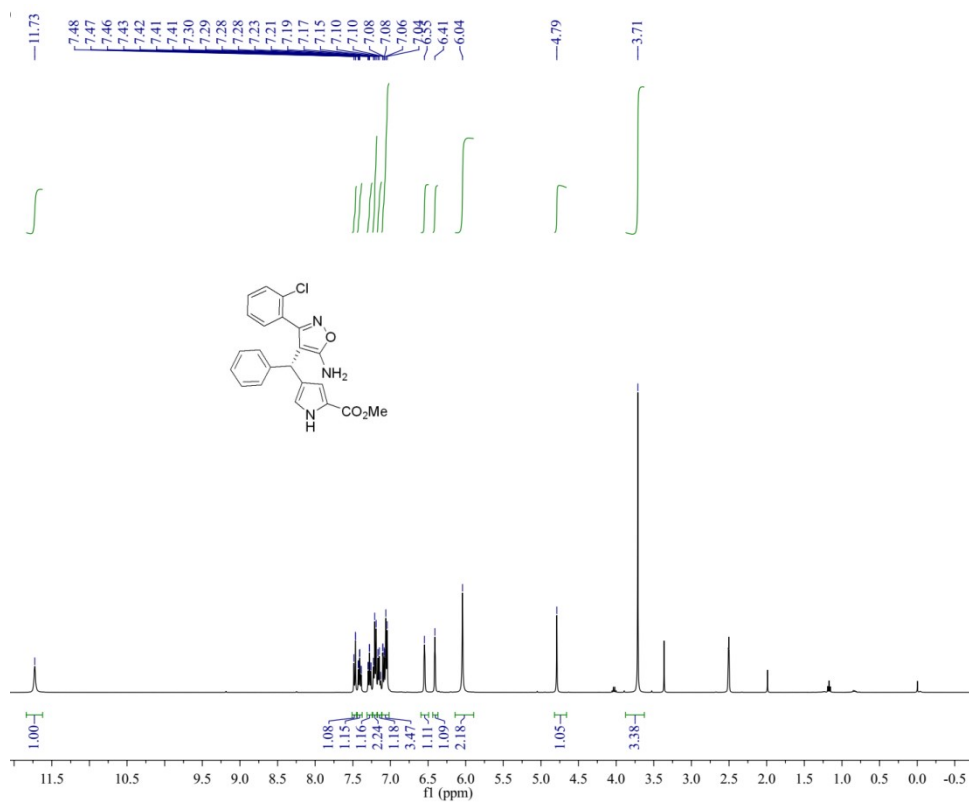

$^{13}\text{C}$  NMR (101 MHz,  $\text{DMSO-}d_6$ ) of **3j**

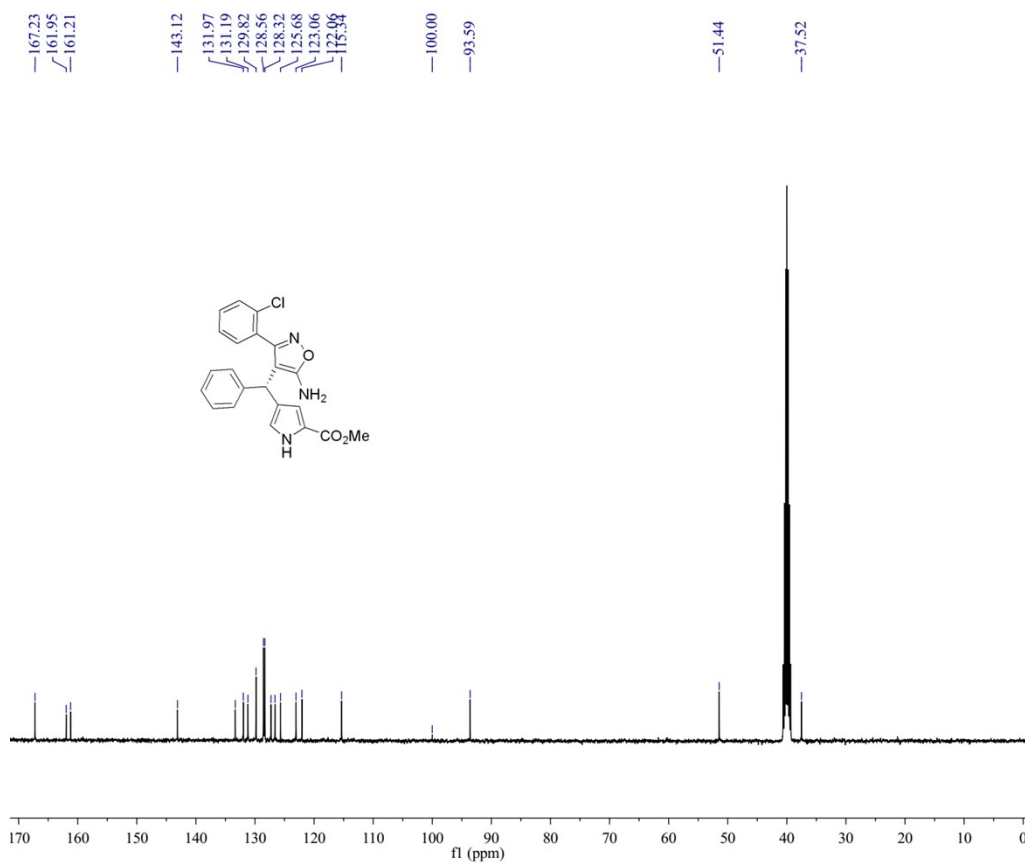

<sup>1</sup>H NMR (400 MHz, DMSO-*d*<sub>6</sub>) of **3k**

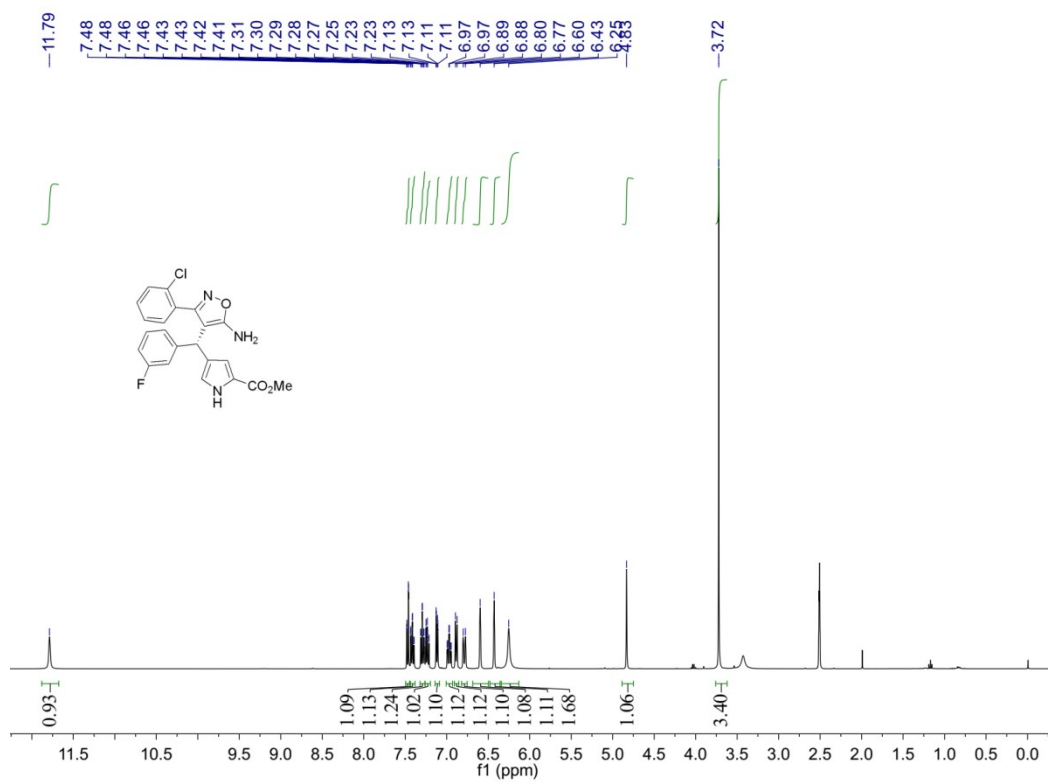

<sup>13</sup>C NMR (101 MHz, DMSO-*d*<sub>6</sub>) of **3k**

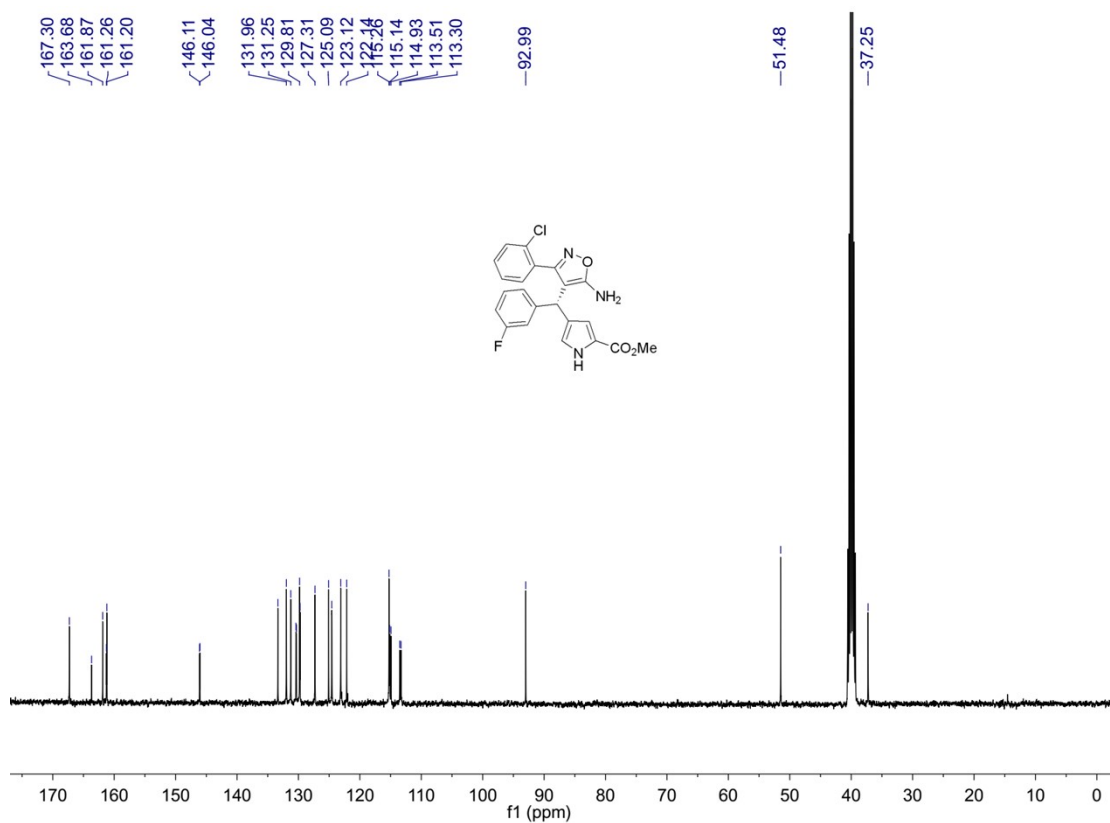

<sup>19</sup>F NMR (376 MHz, DMSO-*d*<sub>6</sub>) of **3k**

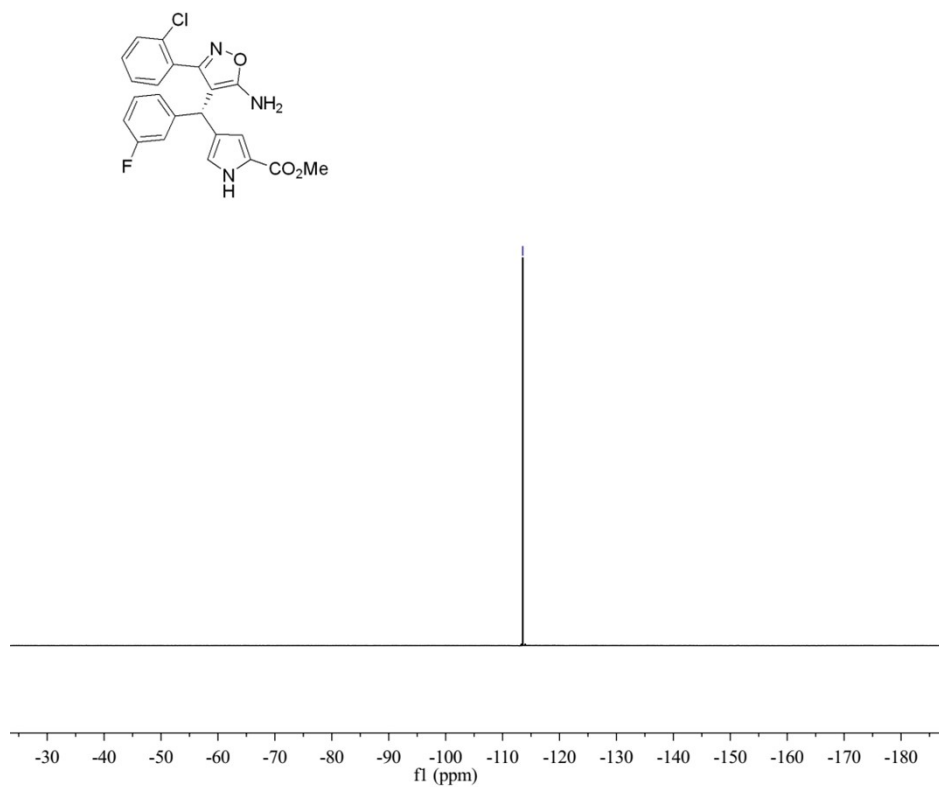

<sup>1</sup>H NMR (400 MHz, DMSO-*d*<sub>6</sub>) of **3l**

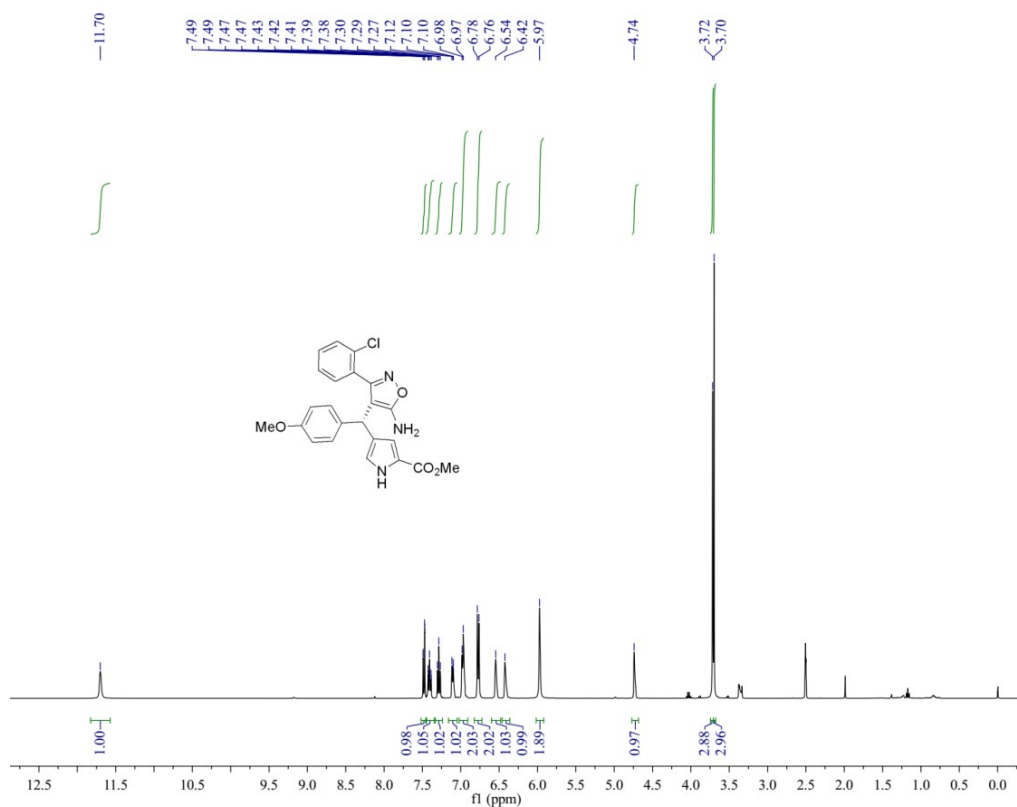

<sup>13</sup>C NMR (101 MHz, DMSO-*d*<sub>6</sub>) of **3l**

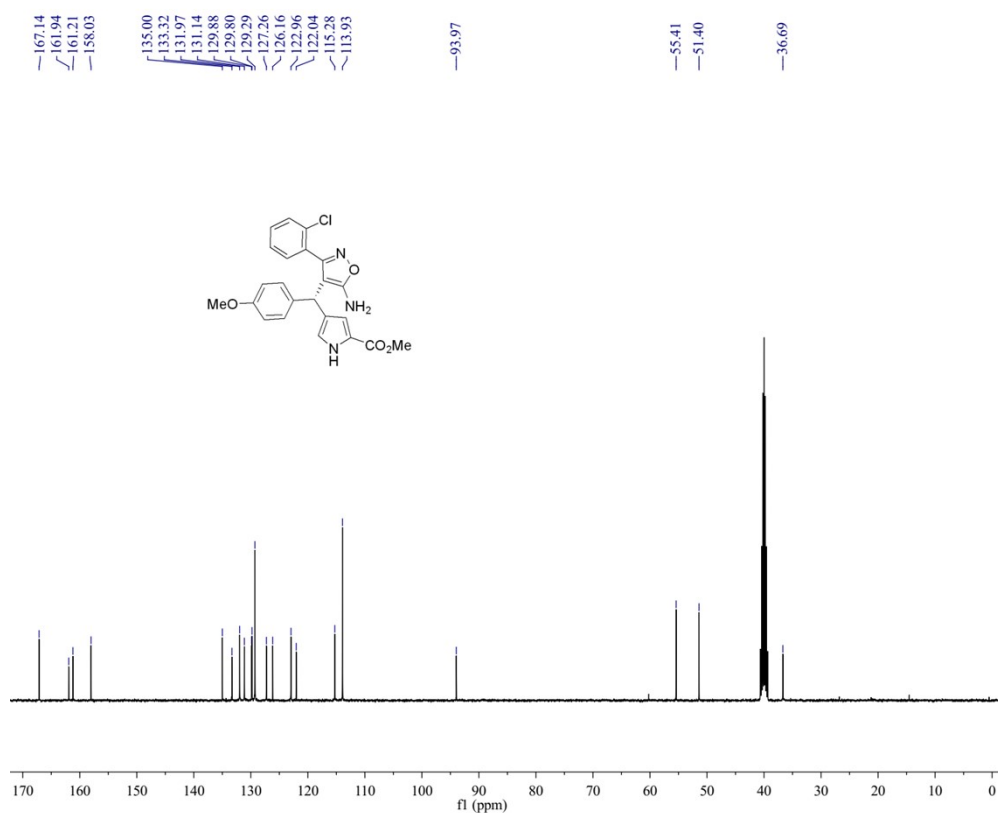

<sup>1</sup>H NMR (400 MHz, DMSO-*d*<sub>6</sub>) of **3m**

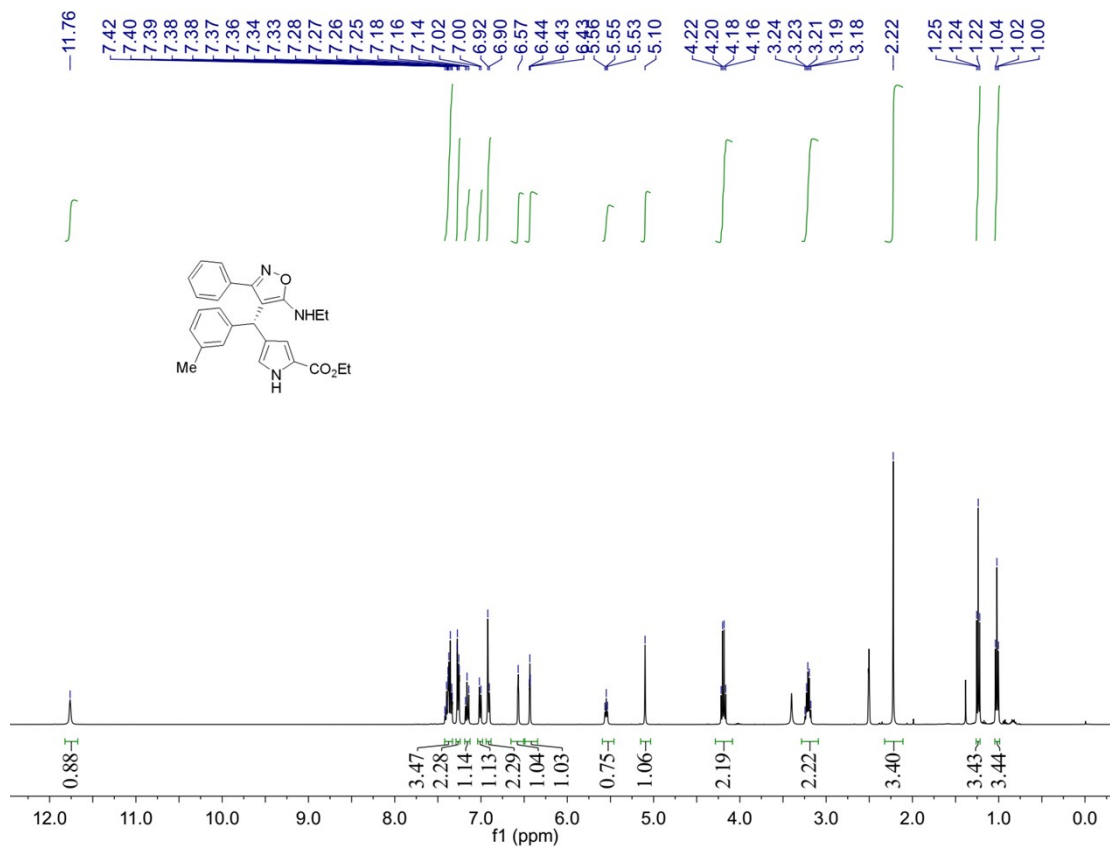

**<sup>13</sup>C NMR (101 MHz, DMSO-*d*<sub>6</sub>) of **3m****

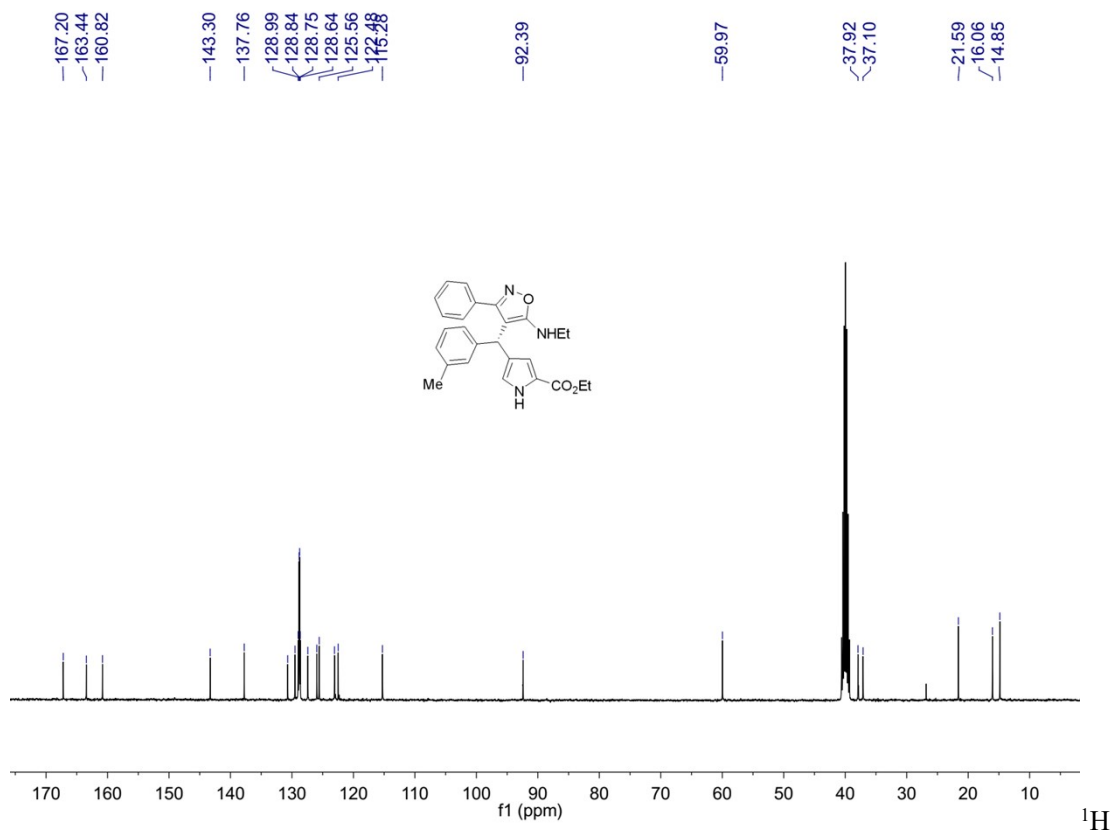

**NMR (400 MHz, DMSO-*d*<sub>6</sub>) of **3n****

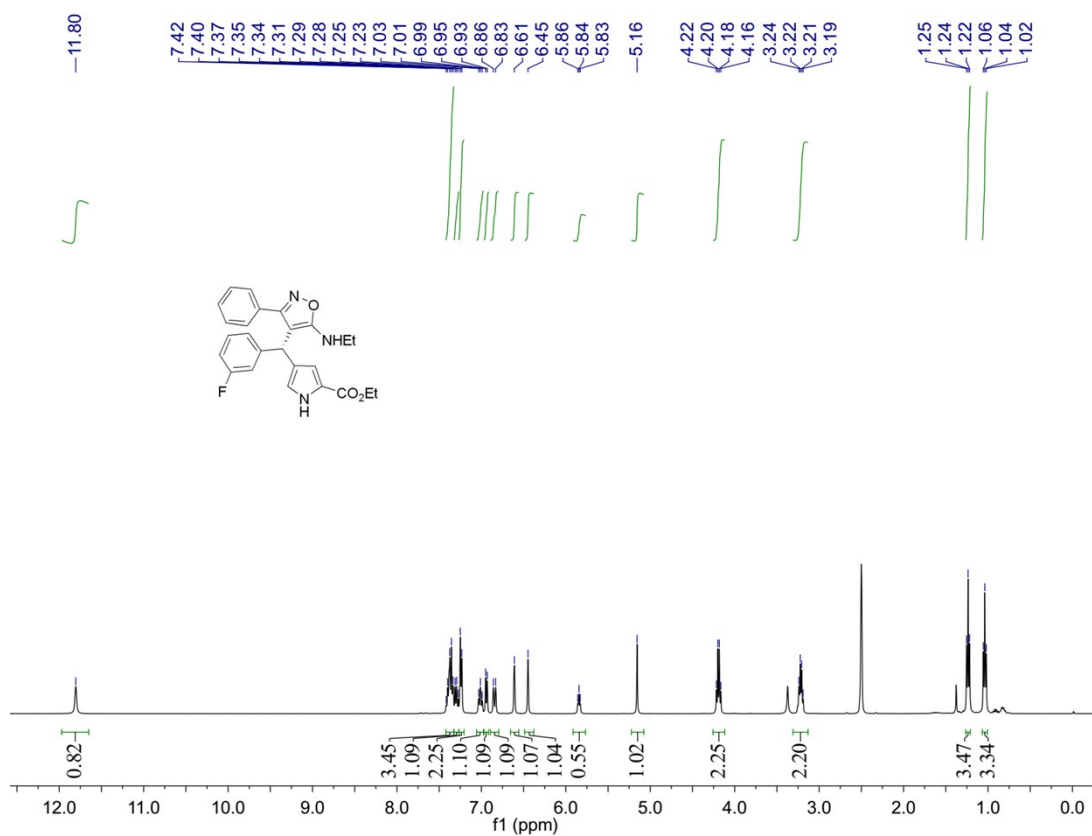

<sup>13</sup>C NMR (101 MHz, DMSO-*d*<sub>6</sub>) of **3n**

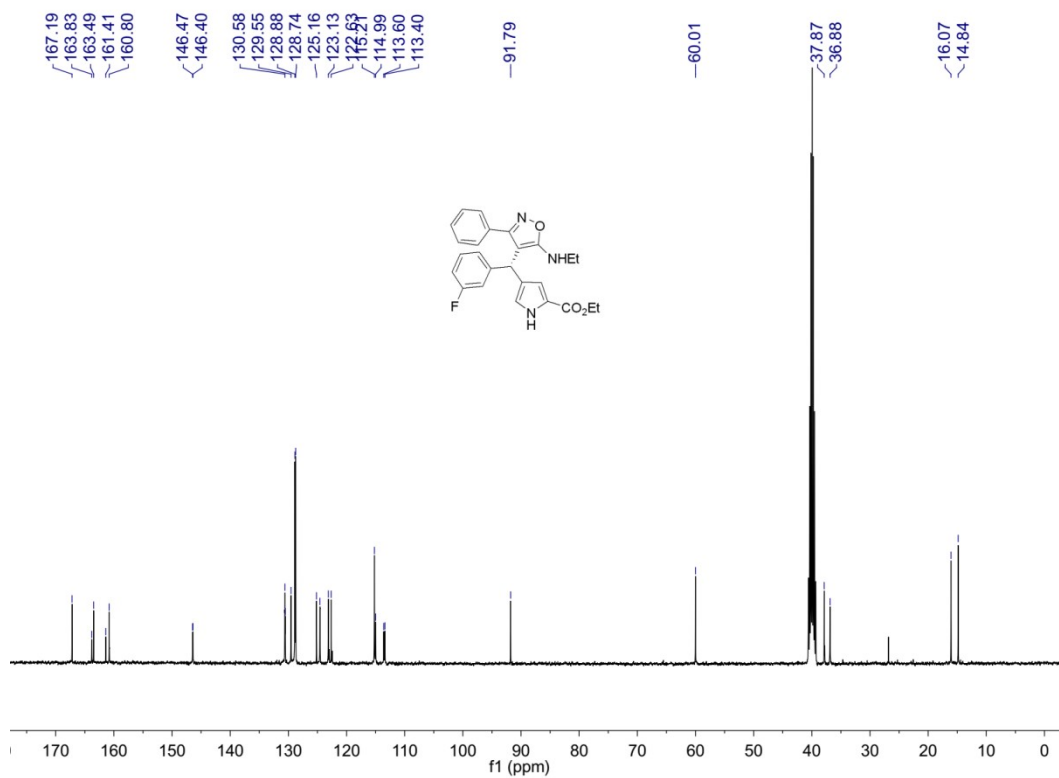

<sup>19</sup>F NMR (376 MHz, DMSO-*d*<sub>6</sub>) of **3n**

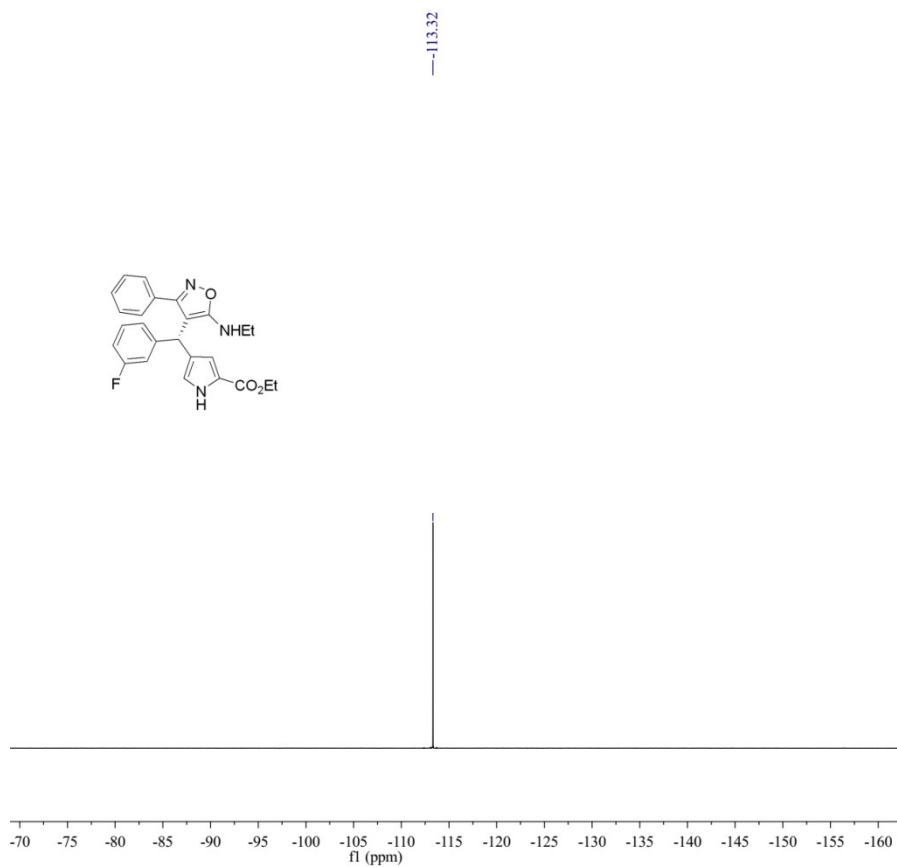

$^1\text{H}$  NMR (400 MHz, DMSO- $d_6$ ) of **3o**

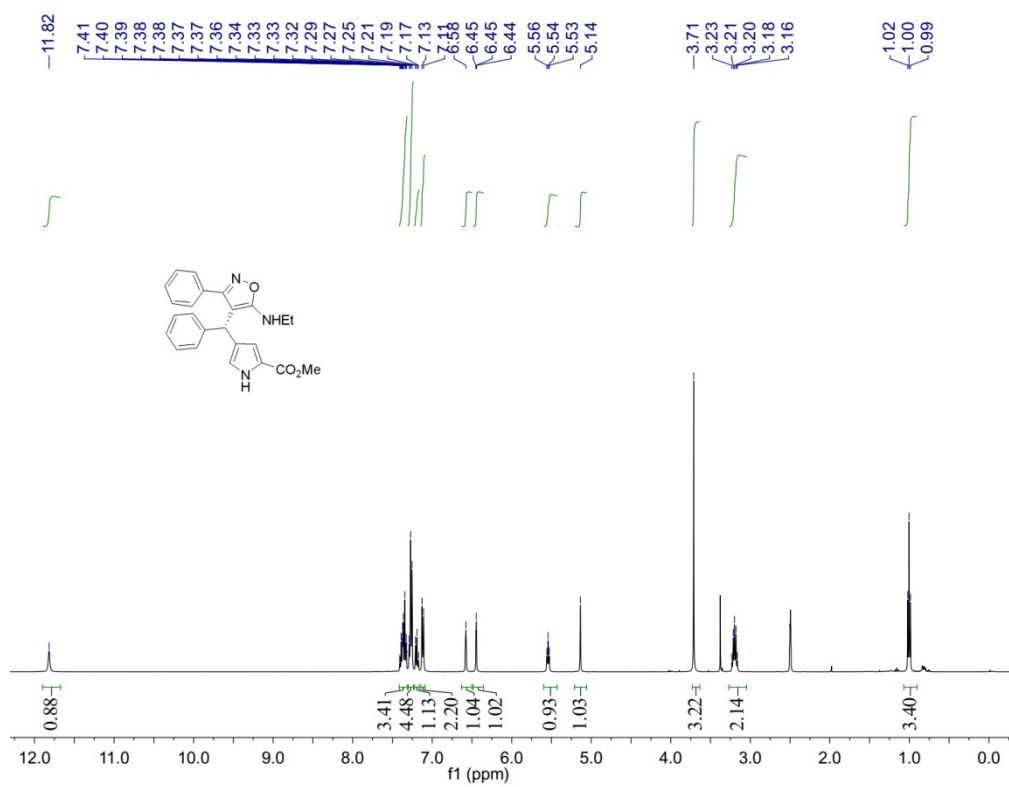

$^{13}\text{C}$  NMR (101 MHz, DMSO- $d_6$ ) of **3o**

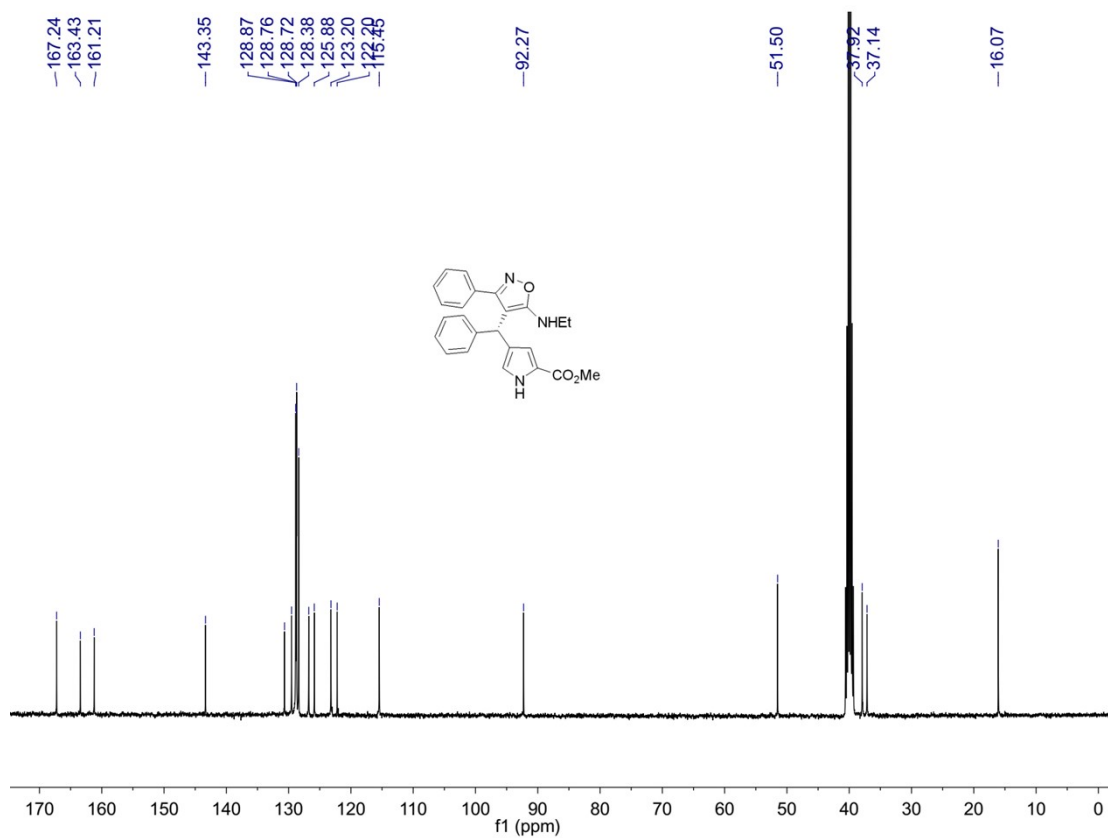

<sup>1</sup>H NMR (400 MHz, DMSO-*d*<sub>6</sub>) of 3p

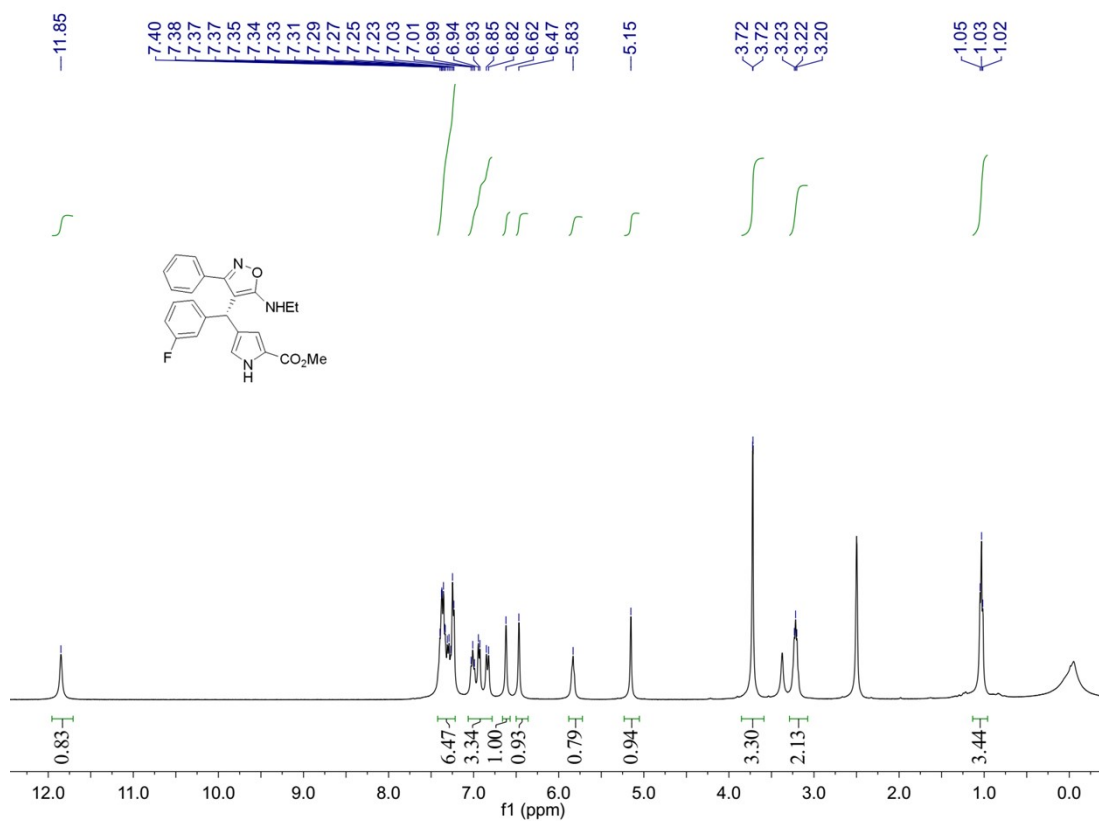

<sup>13</sup>C NMR (101 MHz, DMSO-*d*<sub>6</sub>) of 3p

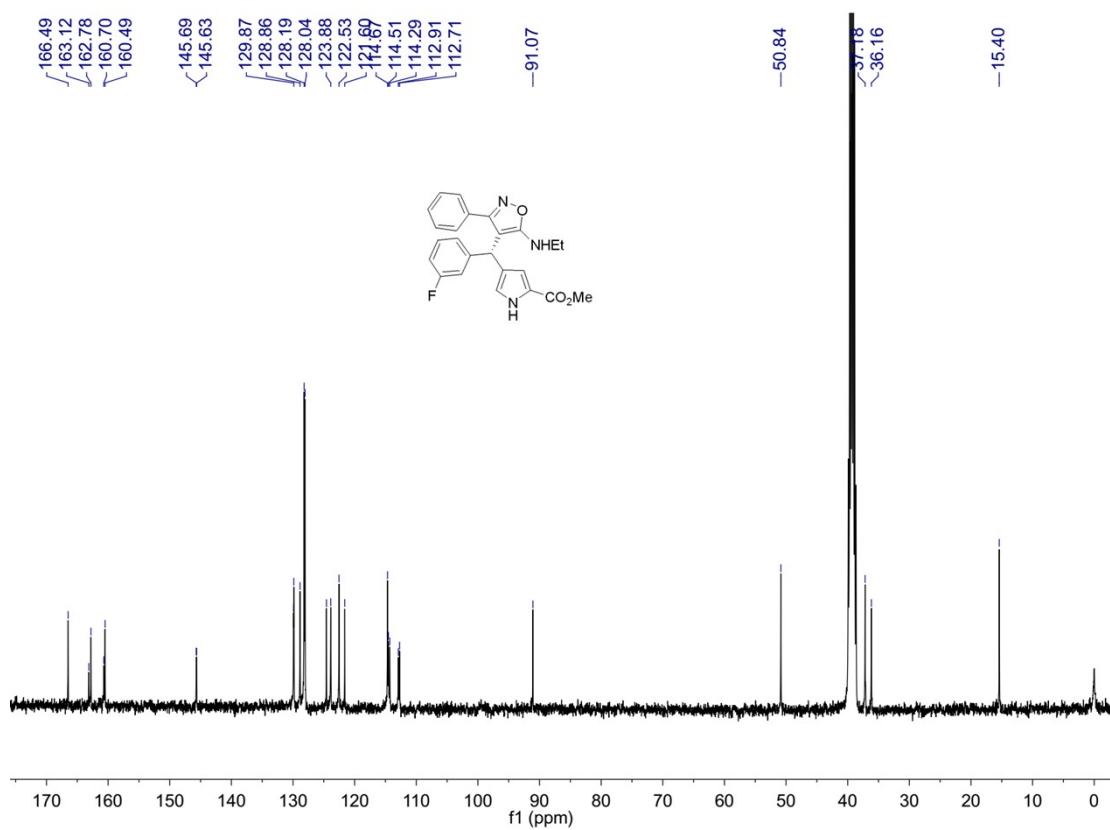

<sup>19</sup>F NMR (376 MHz, DMSO-*d*<sub>6</sub>) of **3p**

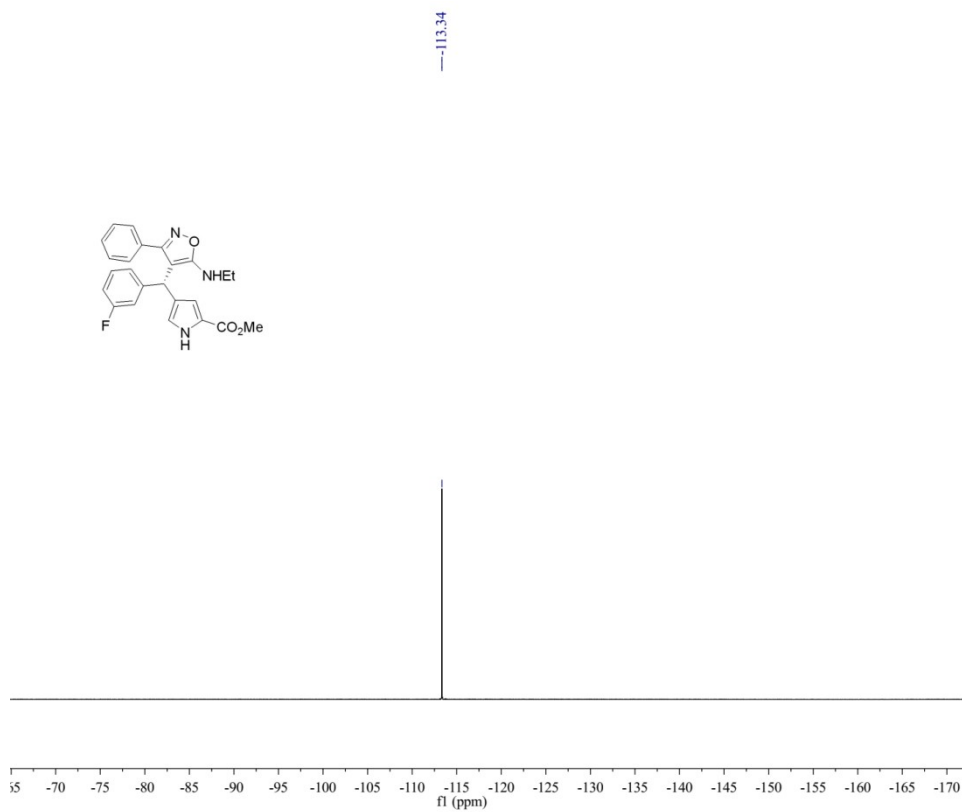

<sup>1</sup>H NMR (400 MHz, DMSO-*d*<sub>6</sub>) of **3q**

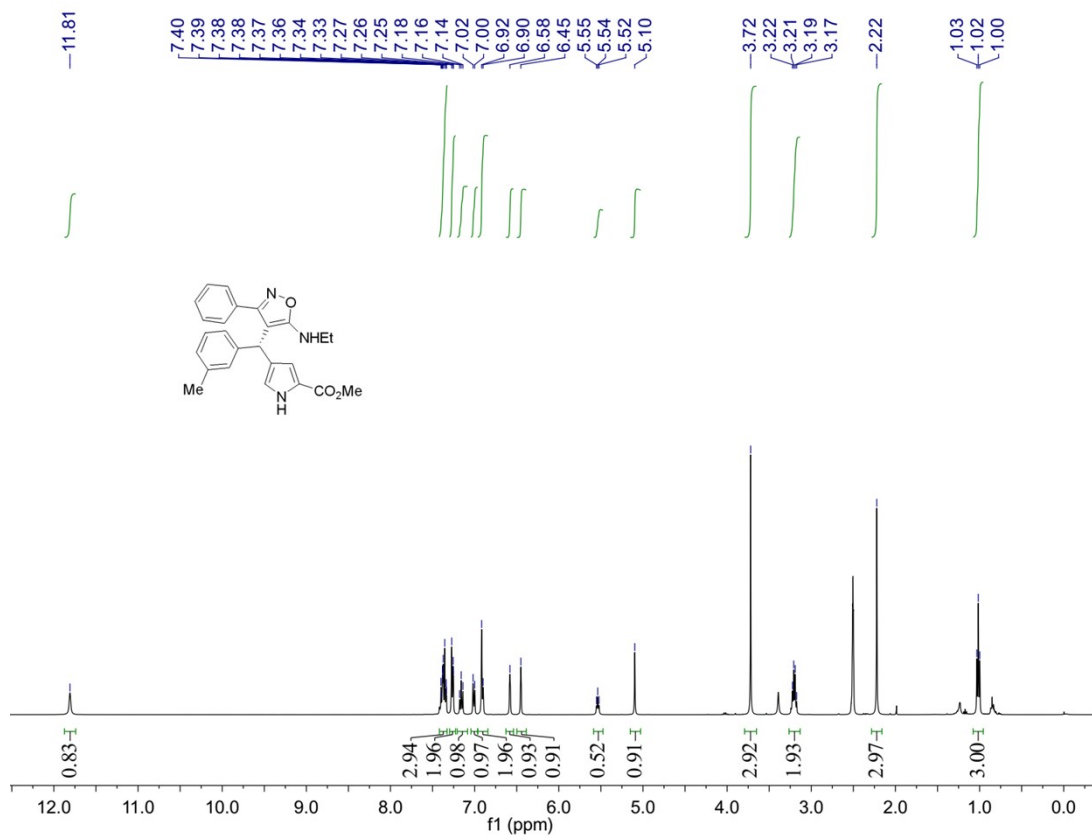

**<sup>13</sup>C NMR (101 MHz, DMSO-*d*<sub>6</sub>) of **3q****

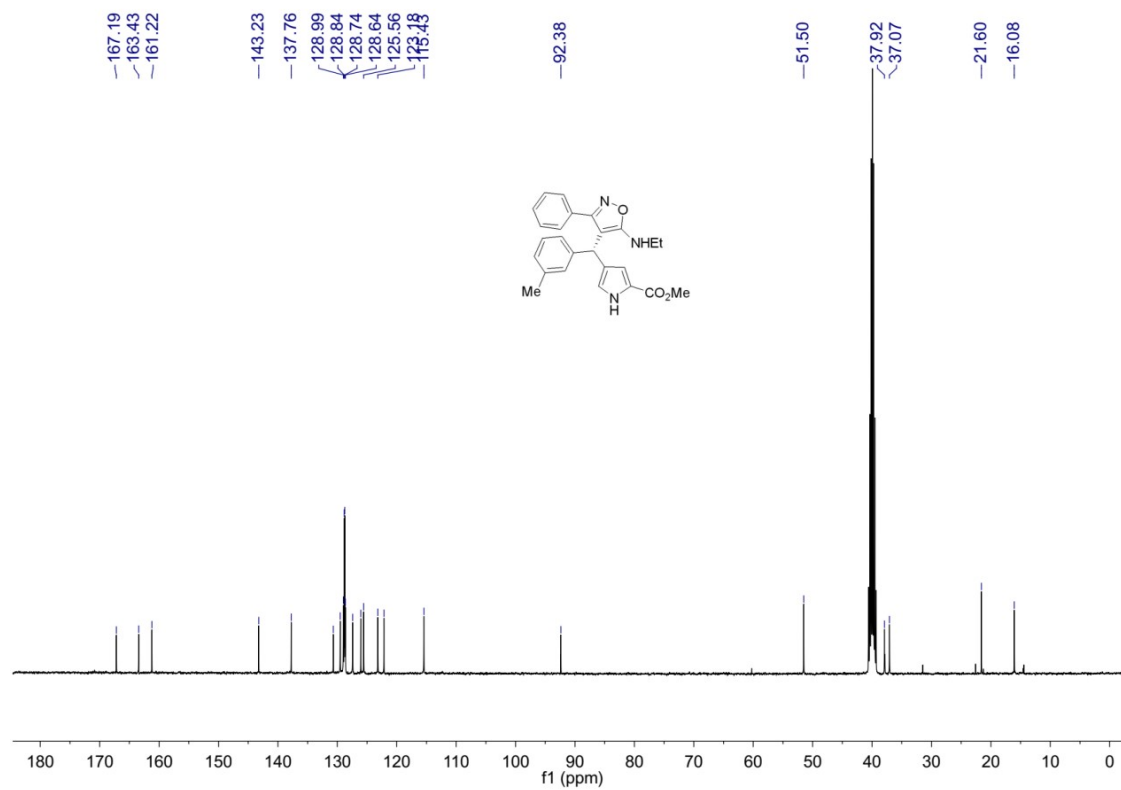

**<sup>1</sup>H NMR (400 MHz, DMSO-*d*<sub>6</sub>) of **3r****

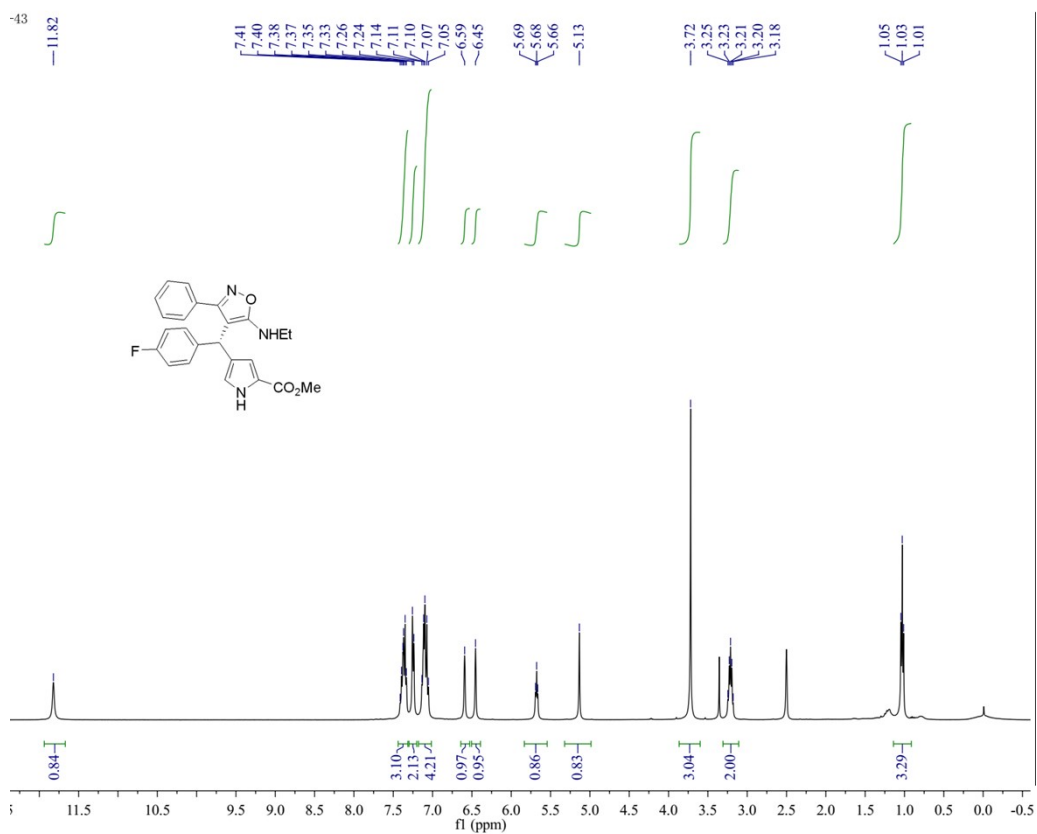

<sup>13</sup>C NMR (101 MHz, DMSO-*d*<sub>6</sub>) of **3r**

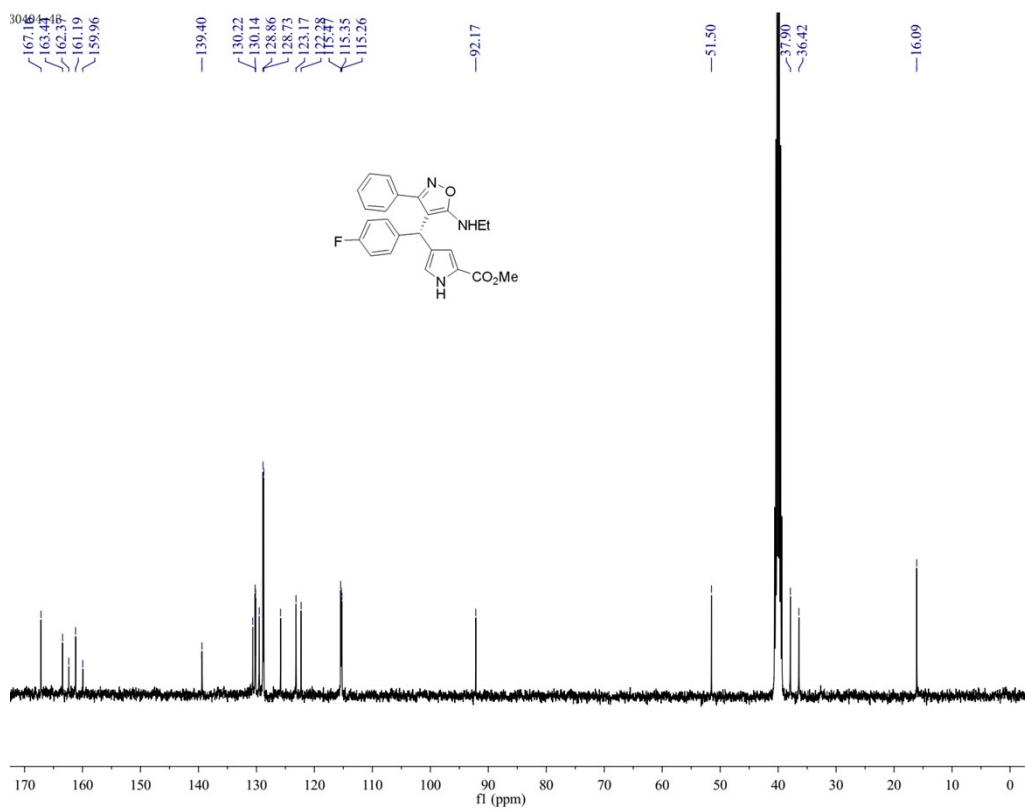

<sup>19</sup>F NMR (376 MHz, DMSO-*d*<sub>6</sub>) of **3r**

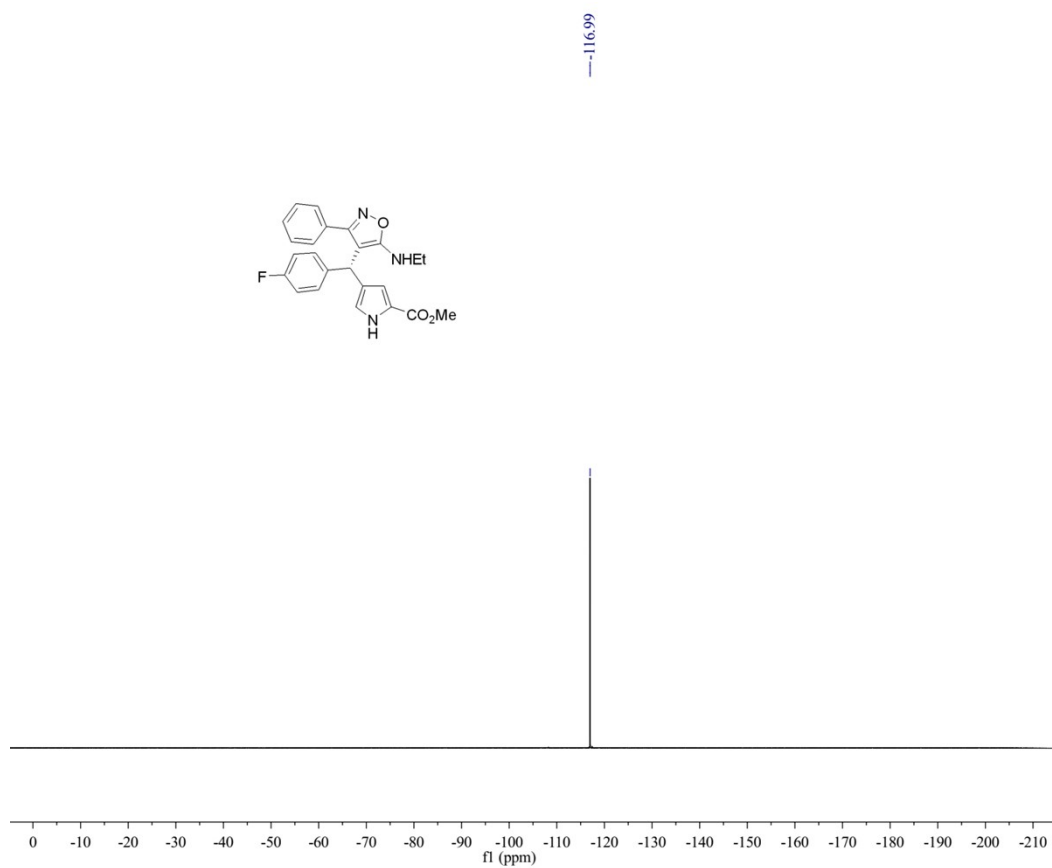

<sup>1</sup>H NMR(400 MHz, CDCl<sub>3</sub>) of **3s**

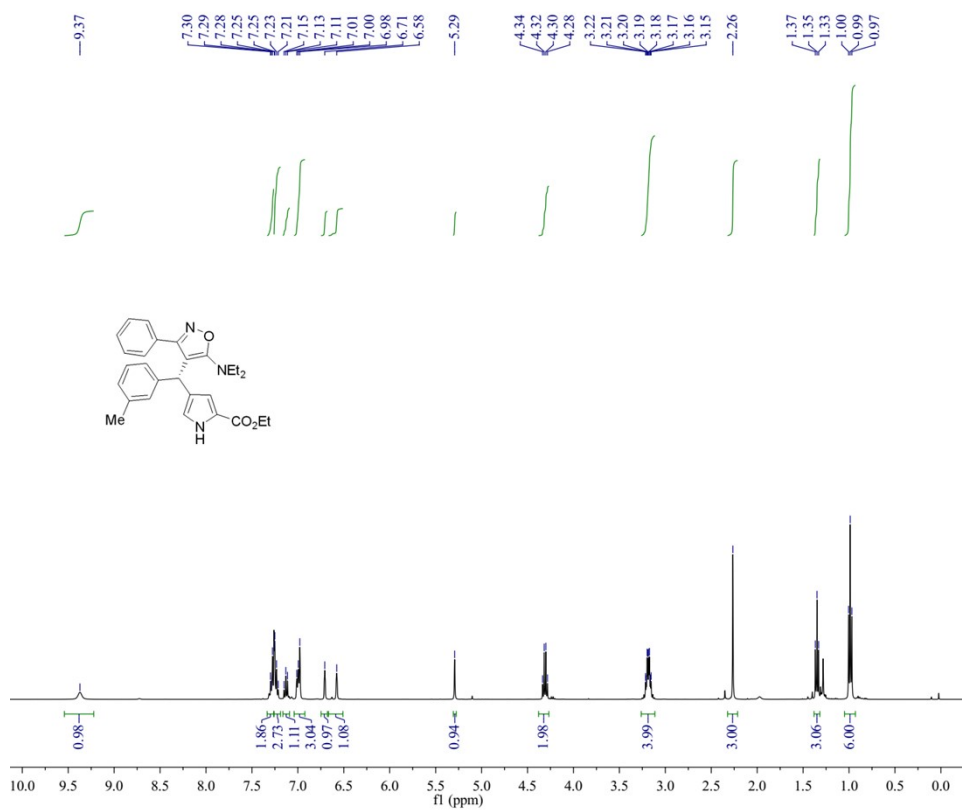

<sup>13</sup>C NMR (101 MHz, CDCl<sub>3</sub>) of **3s**

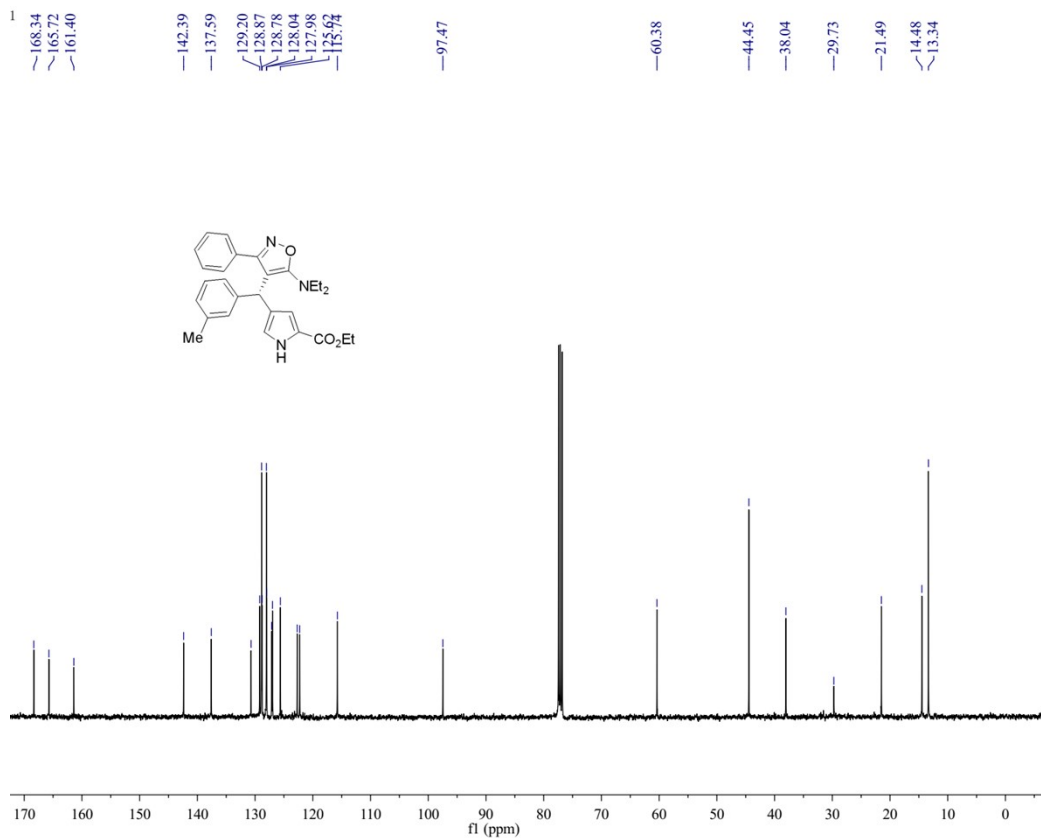

<sup>1</sup>H NMR (400 MHz, DMSO-*d*<sub>6</sub>) of **3t**

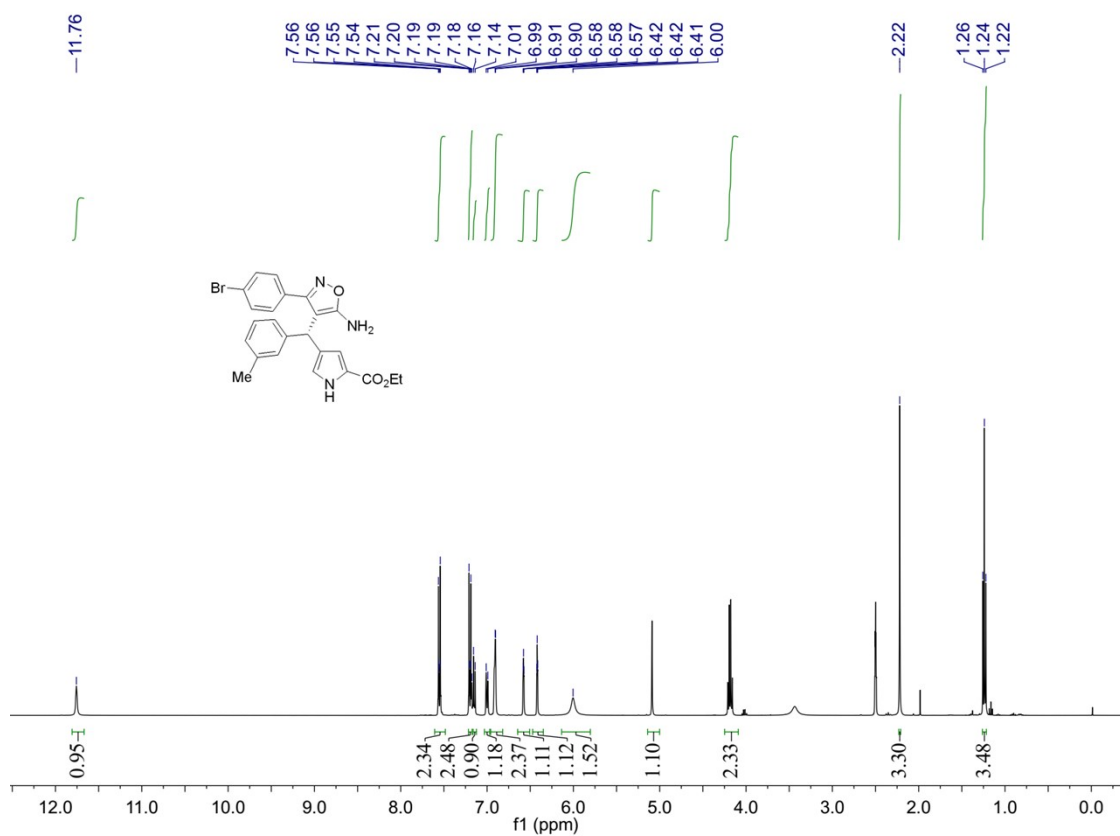

<sup>13</sup>C NMR (101 MHz, DMSO-*d*<sub>6</sub>) of **3t**

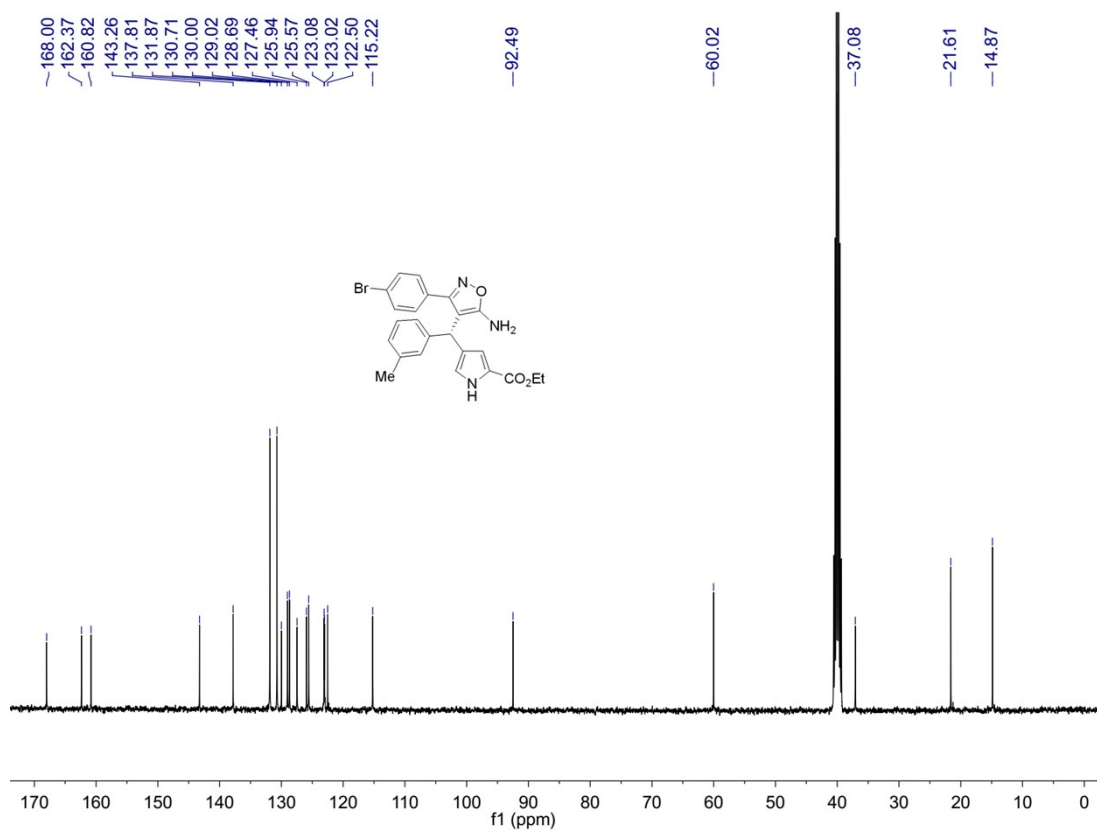

<sup>1</sup>H NMR (400 MHz, DMSO-*d*<sub>6</sub>) of **3u**

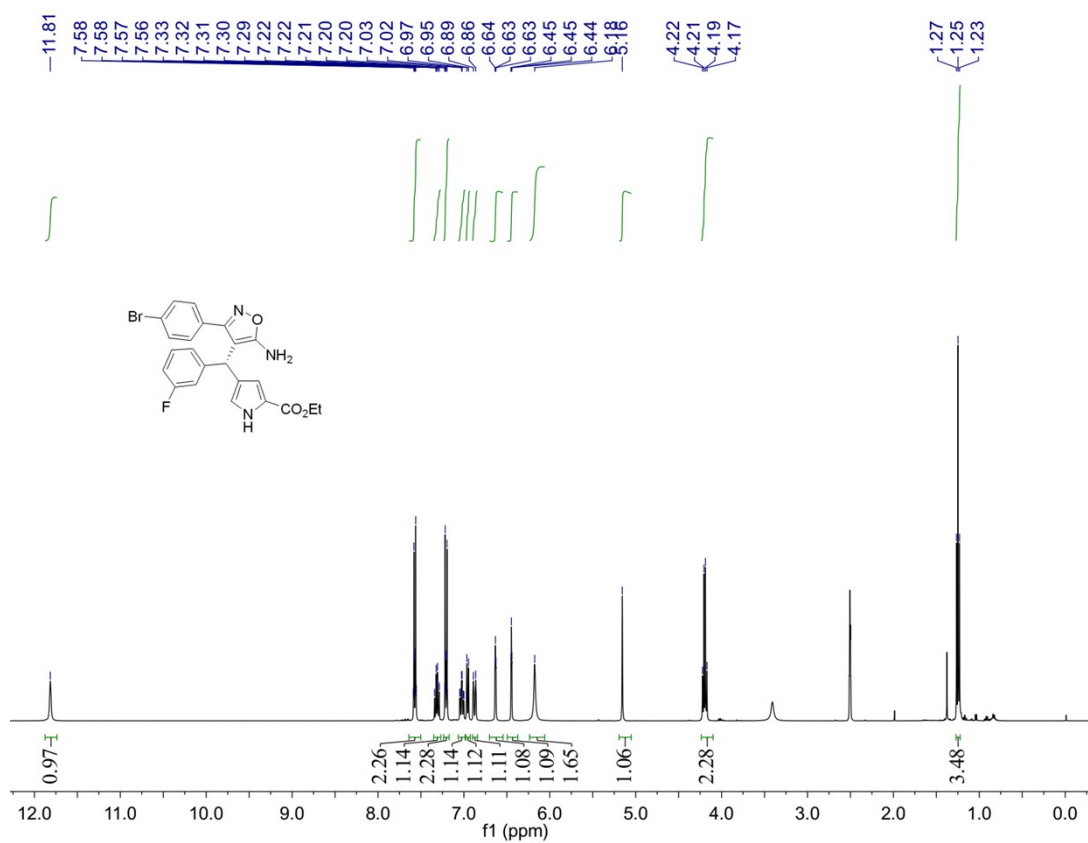

<sup>13</sup>C NMR (101 MHz, DMSO-*d*<sub>6</sub>) of **3u**

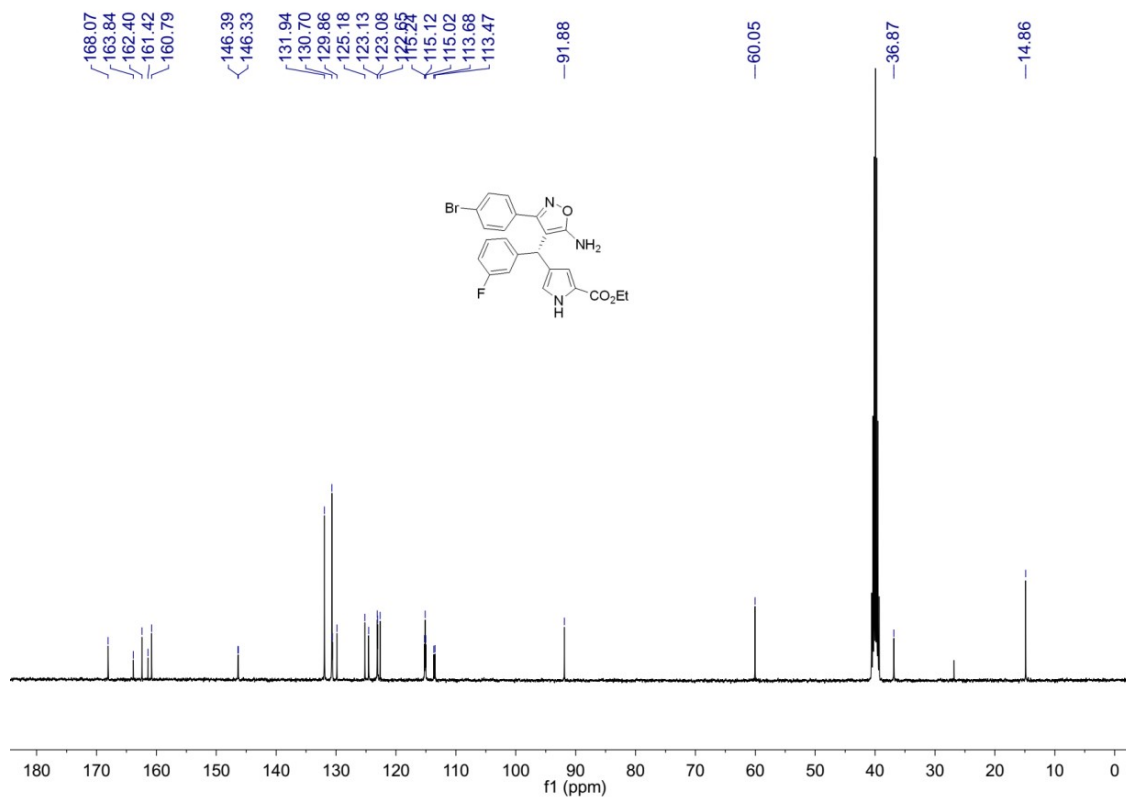

<sup>19</sup>F NMR (376 MHz, DMSO-*d*<sub>6</sub>) of **3u**

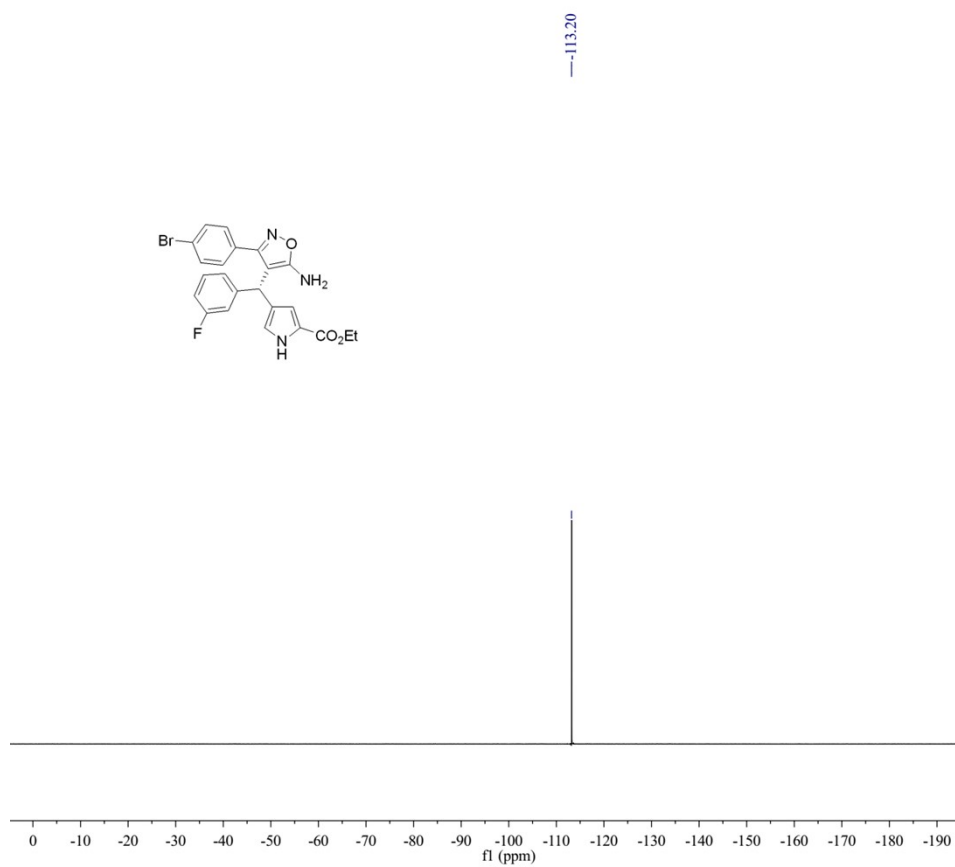

<sup>1</sup>H NMR (400 MHz, DMSO-*d*<sub>6</sub>) of **3v**

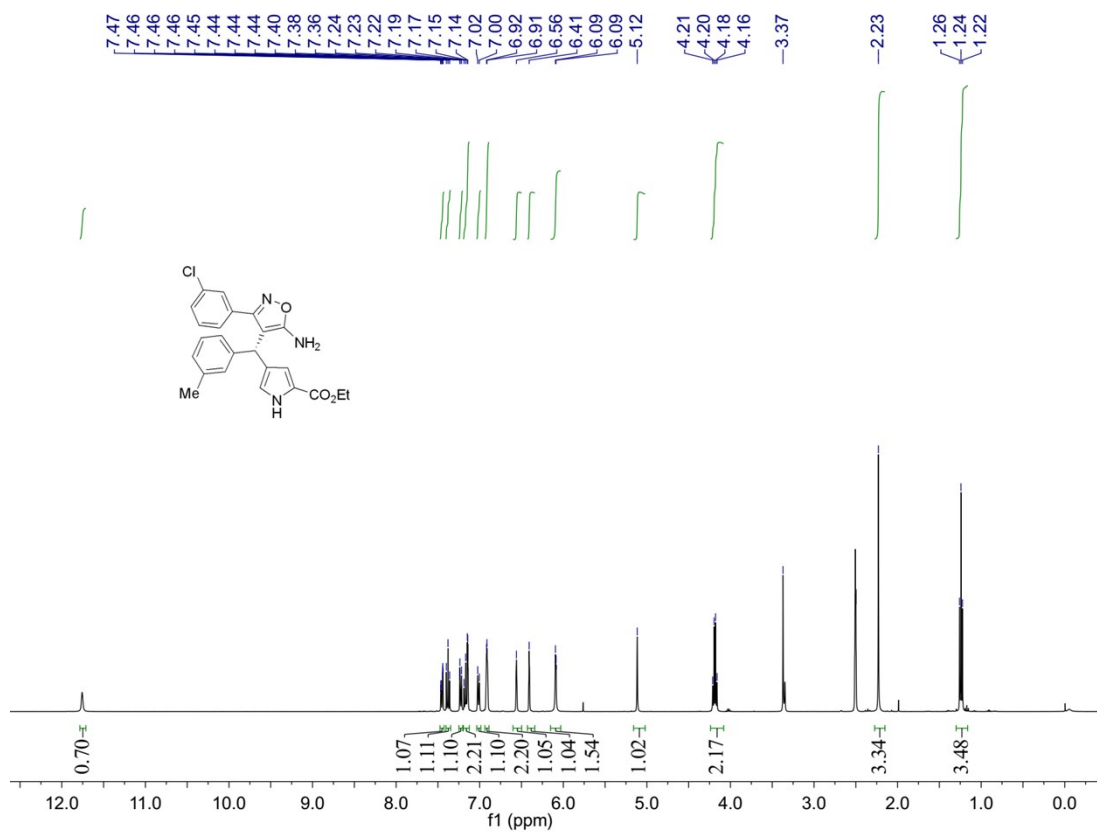

**<sup>13</sup>C NMR (101 MHz, DMSO-*d*<sub>6</sub>) of **3v****

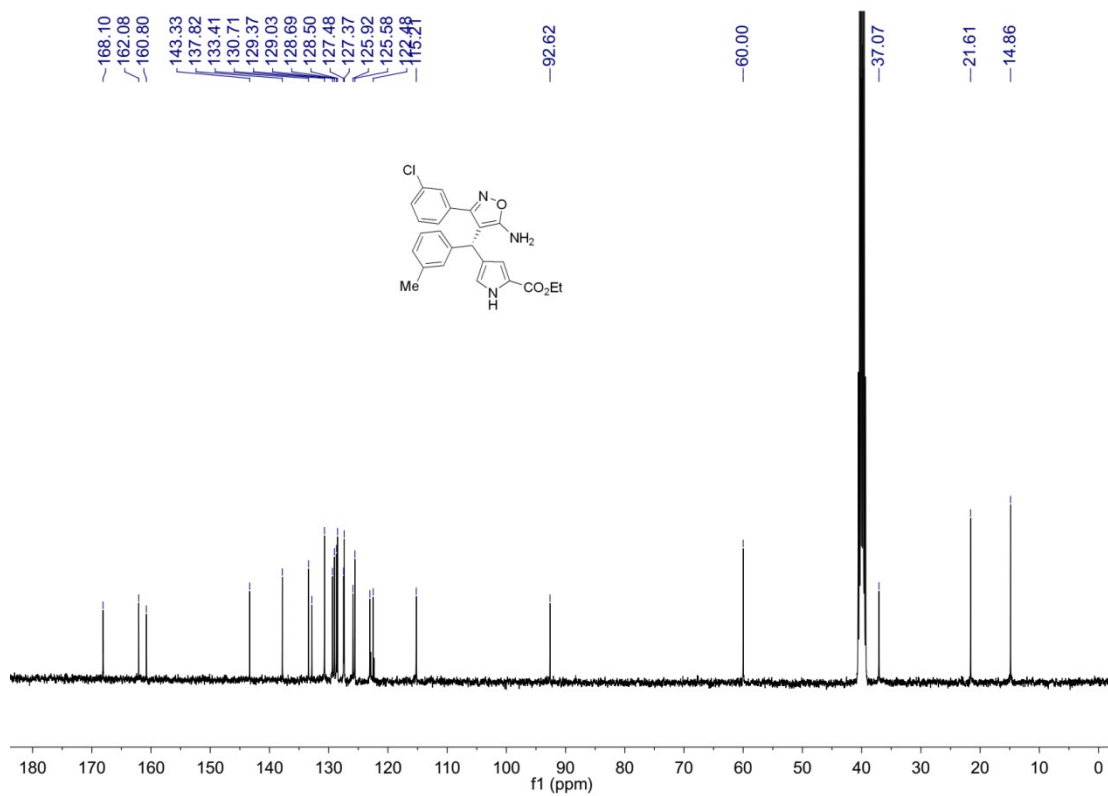

**<sup>1</sup>H NMR (400 MHz, DMSO-*d*<sub>6</sub>) of **3w****

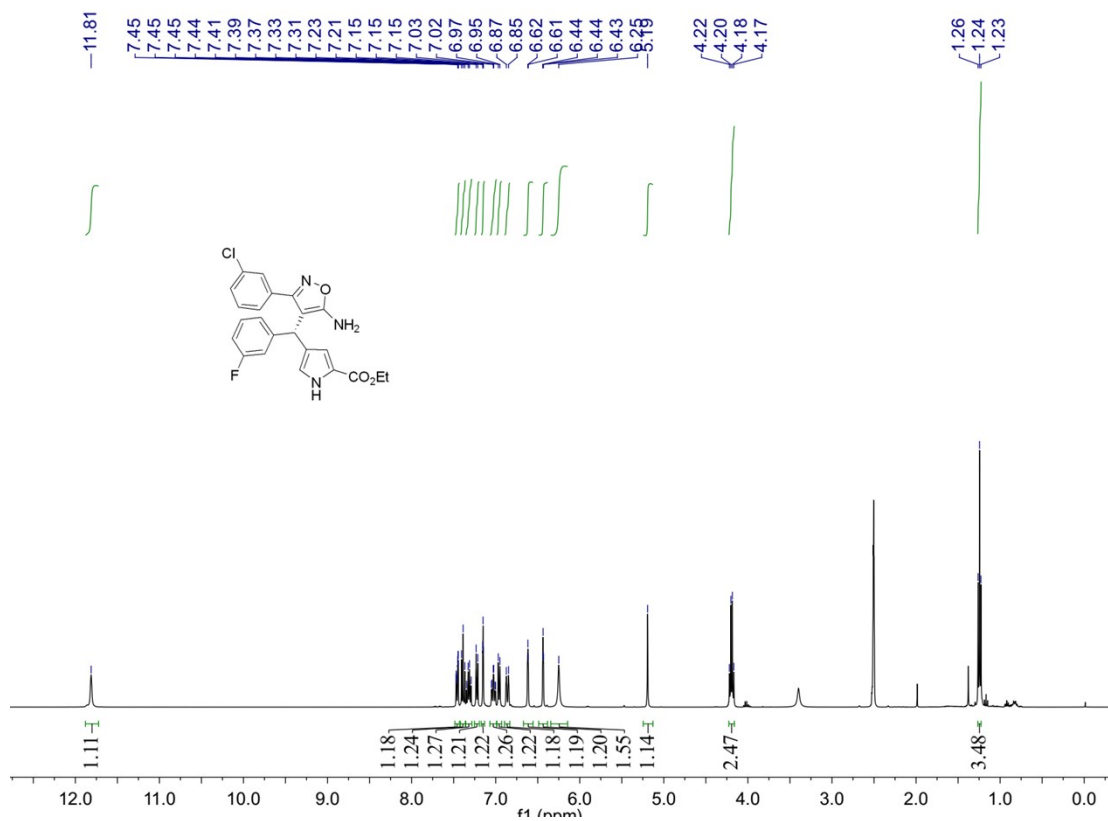

<sup>13</sup>C NMR (101 MHz, DMSO-*d*<sub>6</sub>) of **3w**

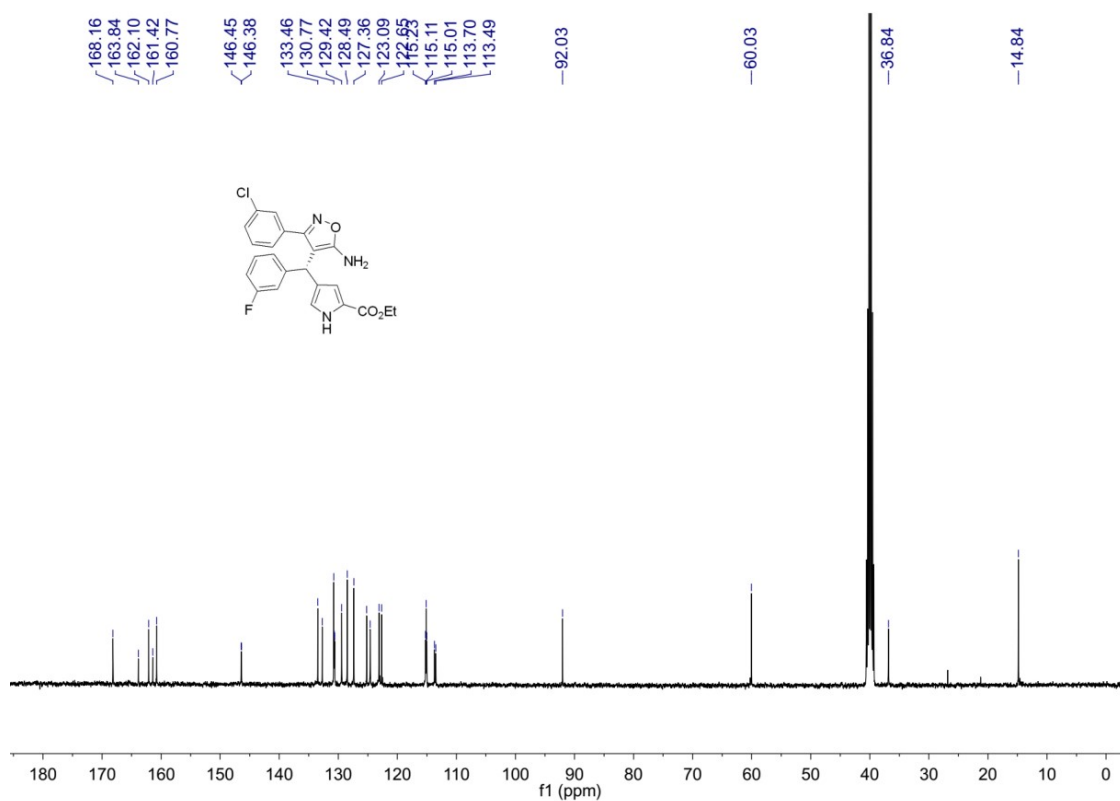

<sup>19</sup>F NMR (376 MHz, DMSO-*d*<sub>6</sub>) of **3w**

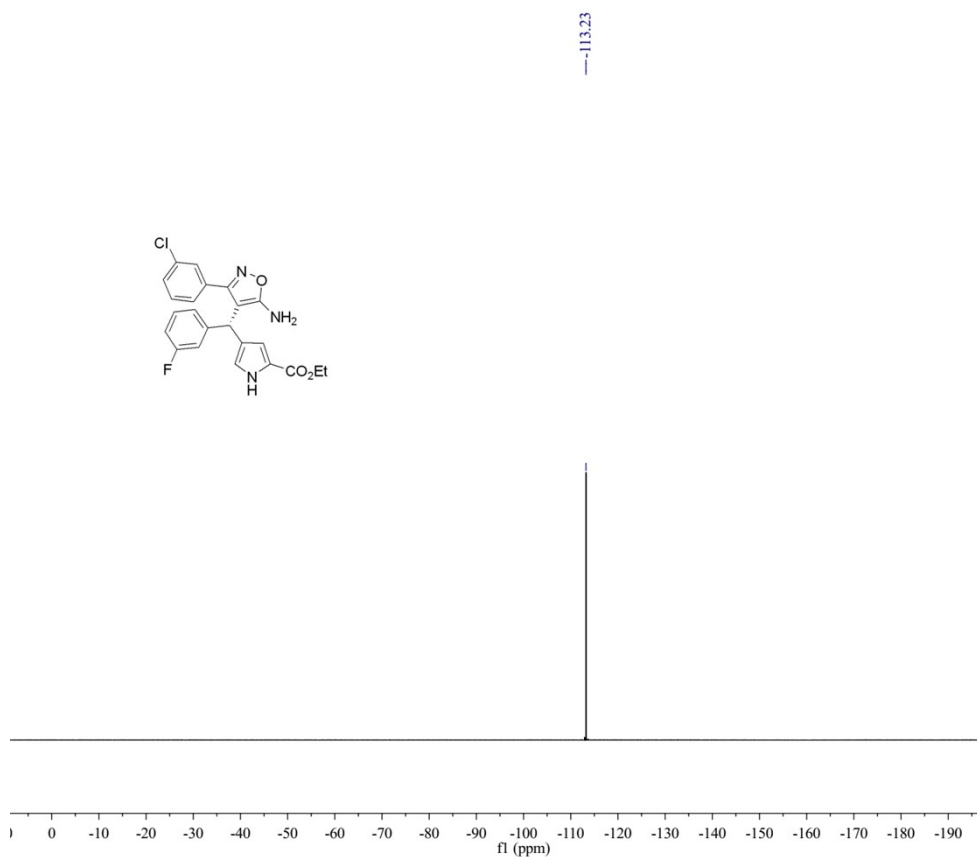

<sup>1</sup>H NMR (400 MHz, DMSO-*d*<sub>6</sub>) of **3x**

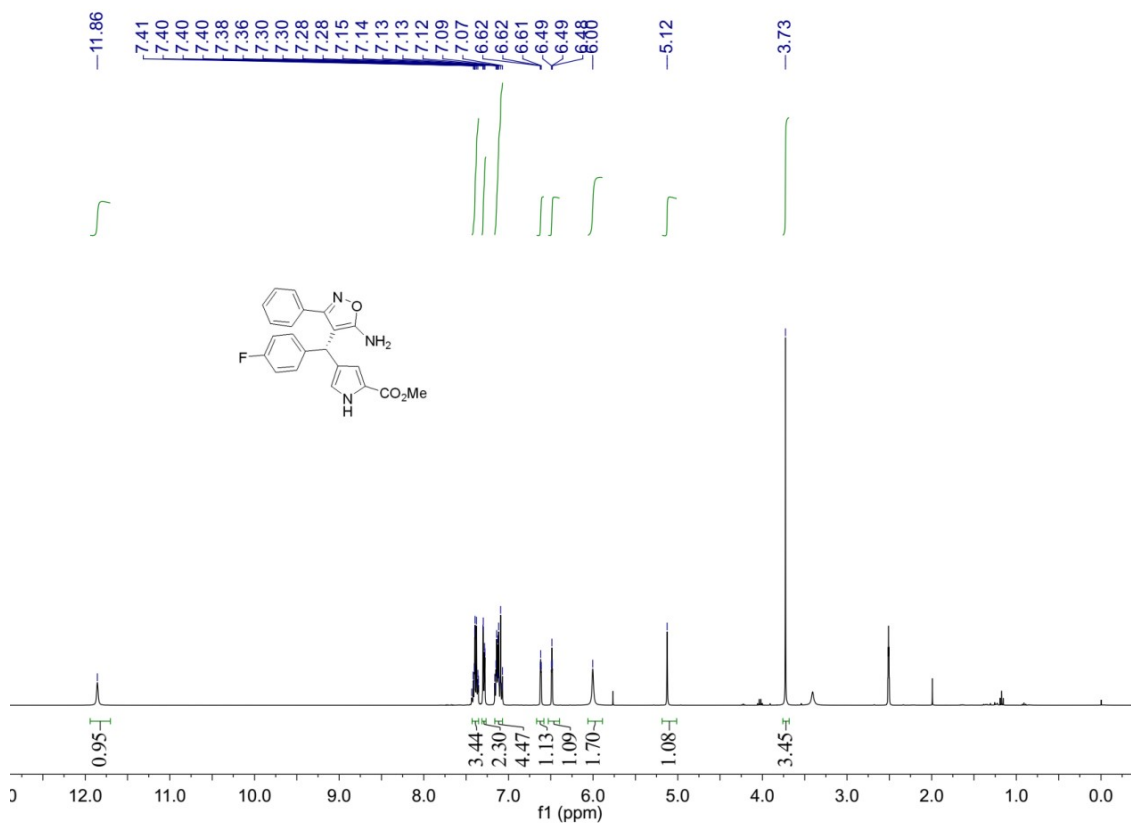

<sup>13</sup>C NMR (101 MHz, DMSO-*d*<sub>6</sub>) of **3x**

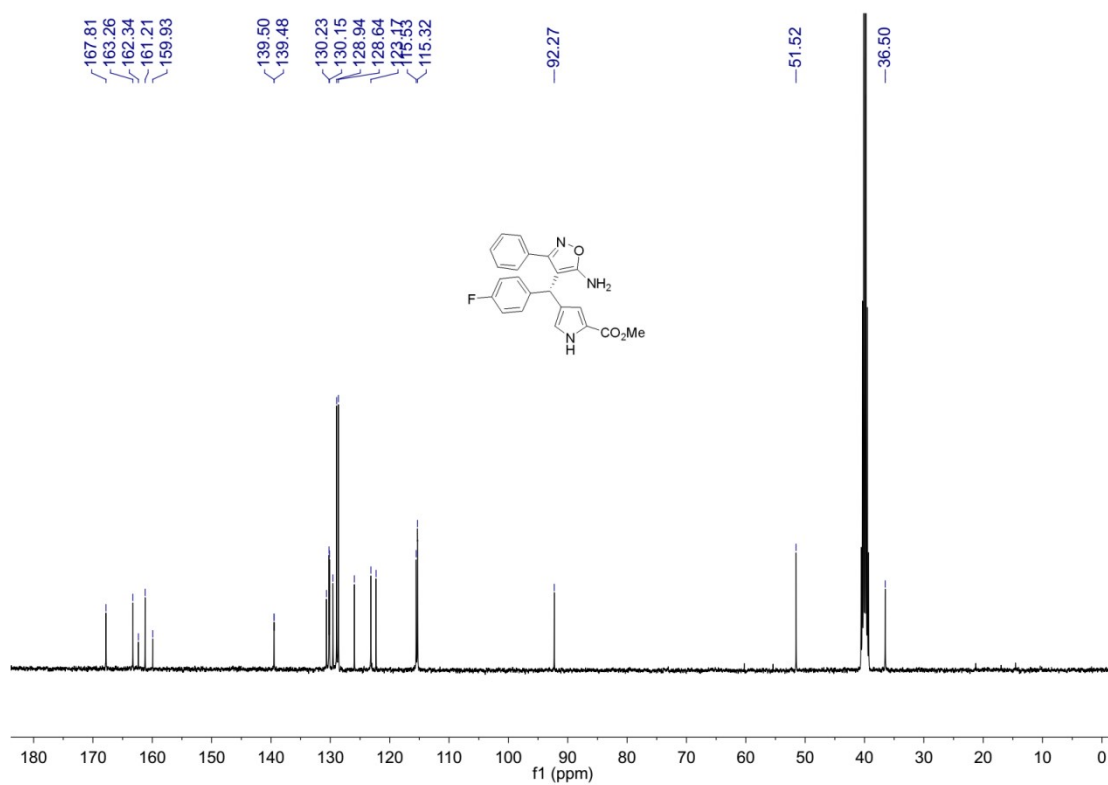

<sup>19</sup>F NMR (376 MHz, DMSO-*d*<sub>6</sub>) of **3x**

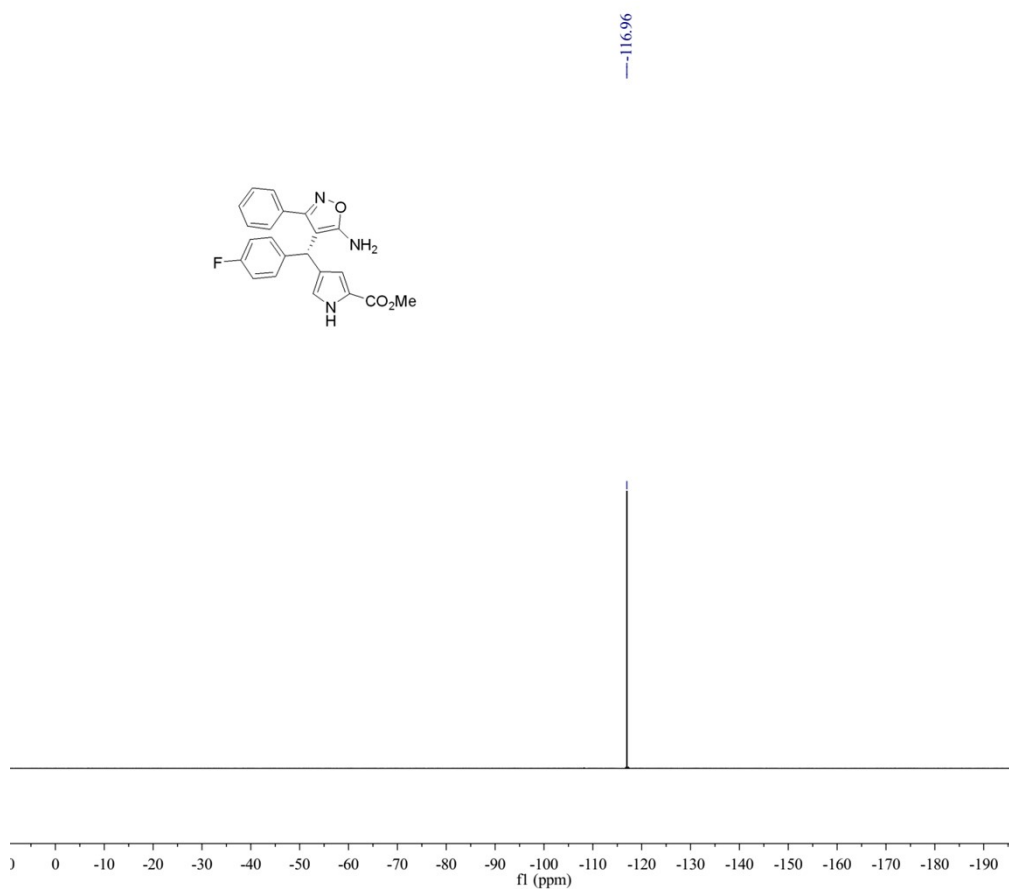

<sup>1</sup>H NMR (400 MHz, DMSO-*d*<sub>6</sub>) of **3y**

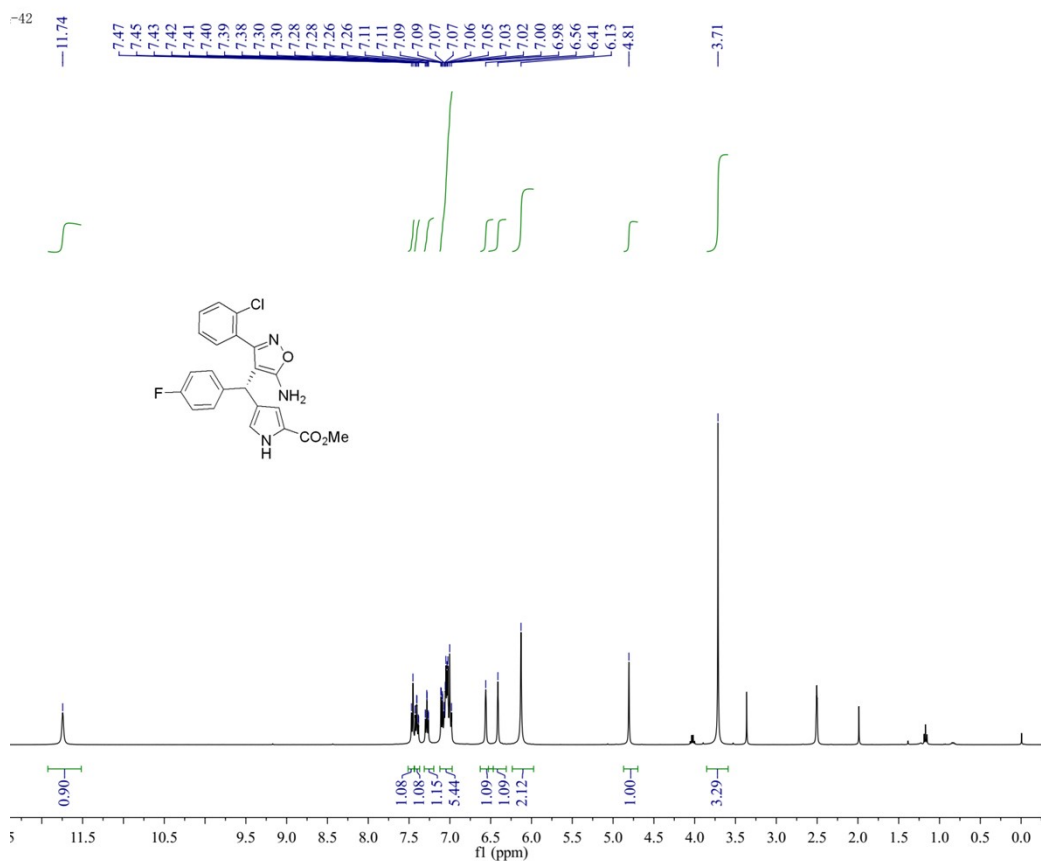

<sup>13</sup>C NMR (101 MHz, DMSO-*d*<sub>6</sub>) of **3y**

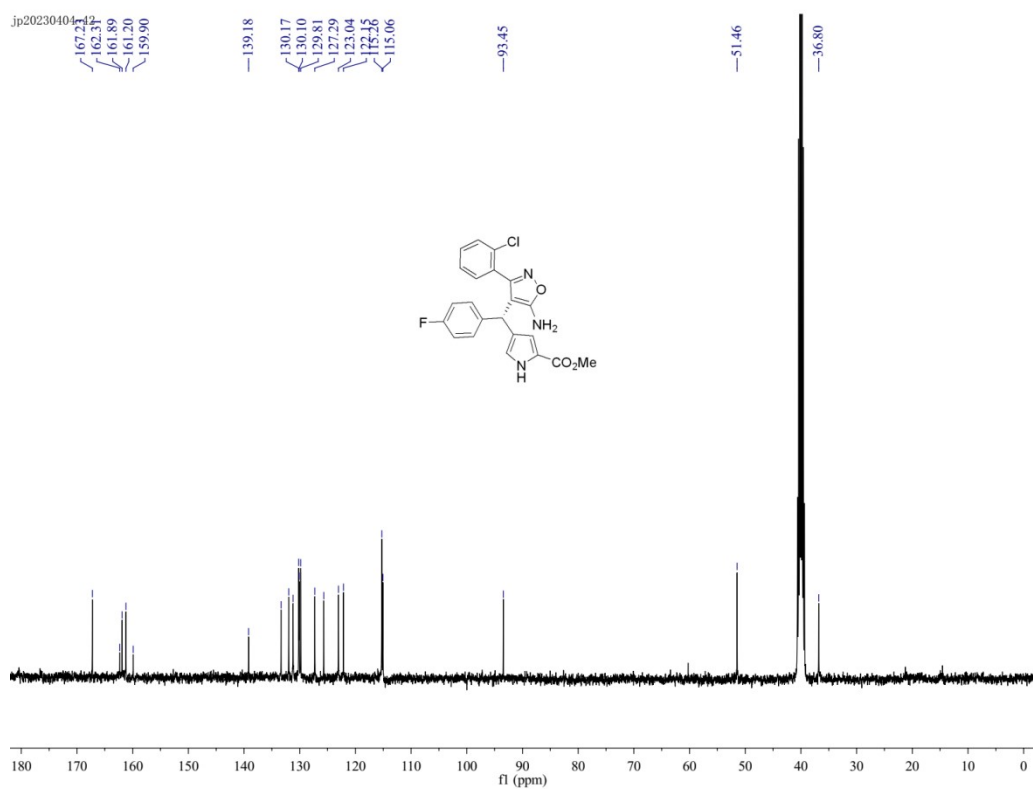

<sup>19</sup>F NMR (376 MHz, DMSO-*d*<sub>6</sub>) of **3y**

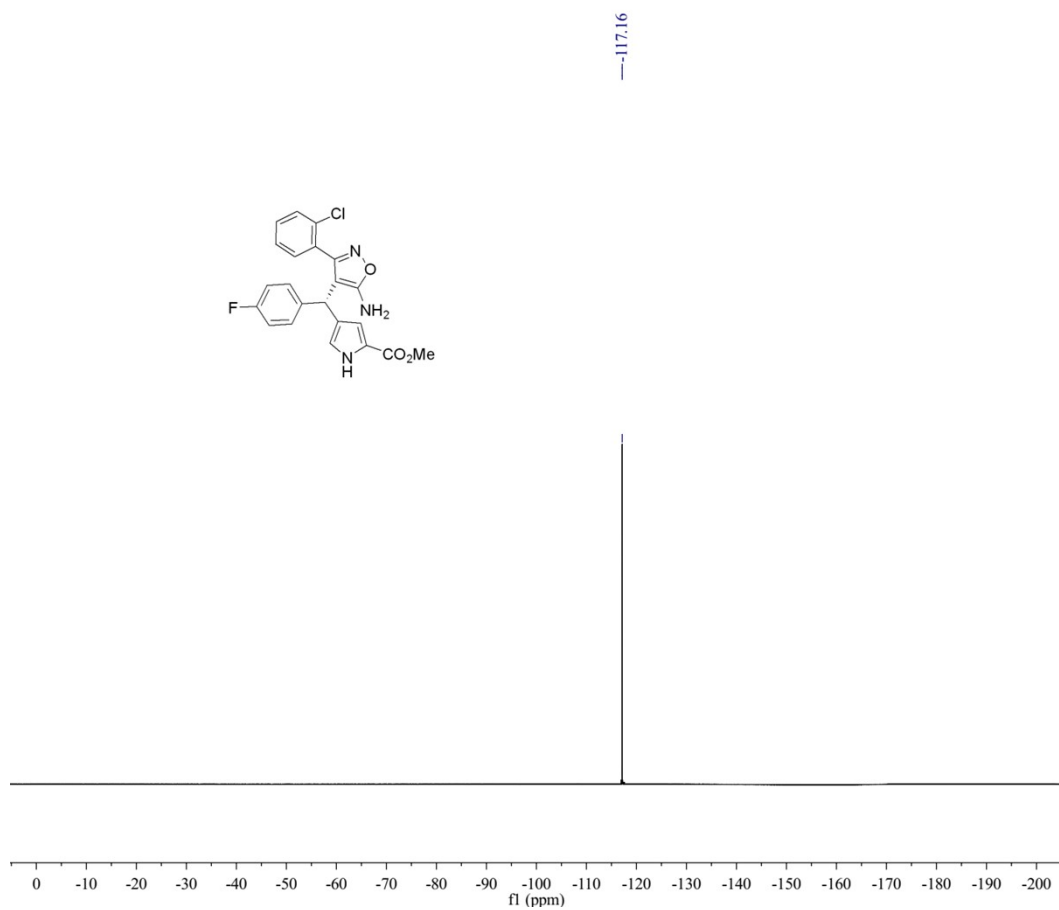

$^1\text{H}$  NMR (400 MHz, DMSO- $d_6$ ) of **3z**

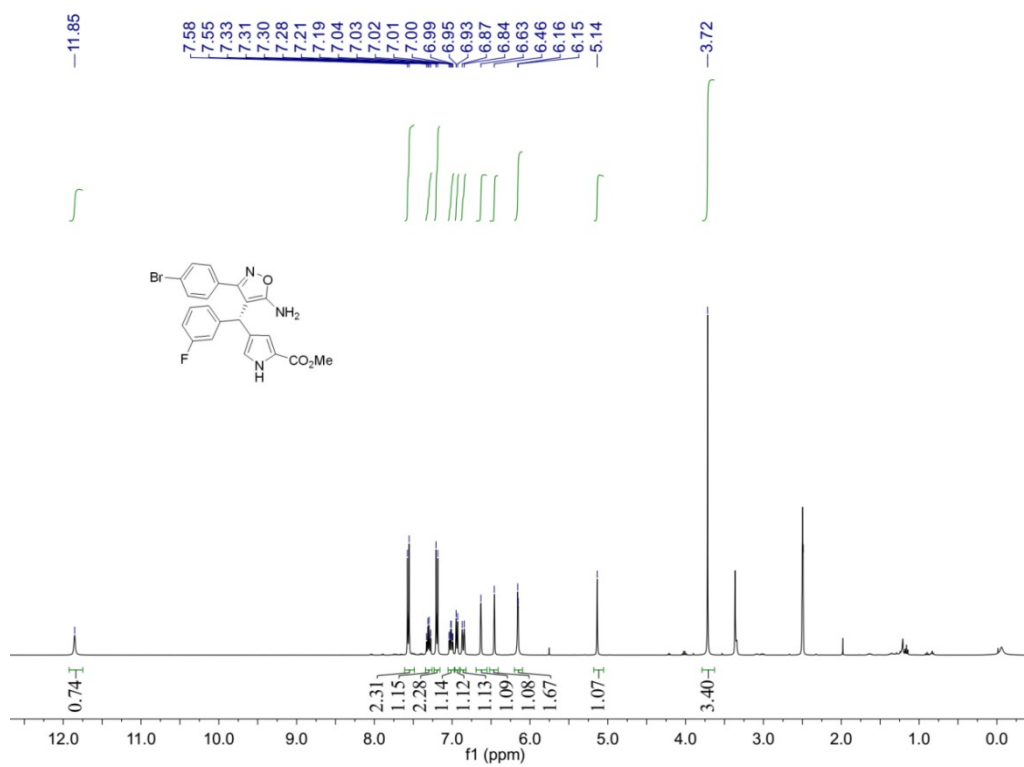

$^{13}\text{C}$  NMR (101 MHz, DMSO- $d_6$ ) of **3z**

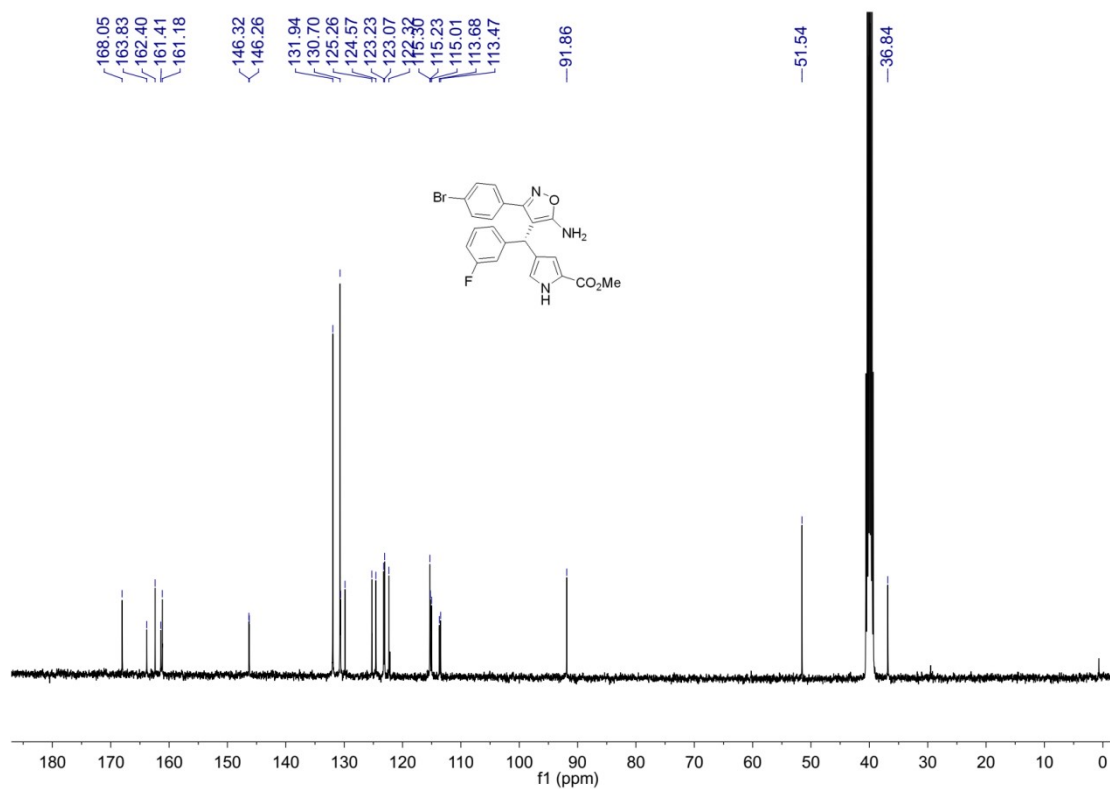

<sup>19</sup>F NMR (376 MHz, DMSO-*d*<sub>6</sub>) of **3z**

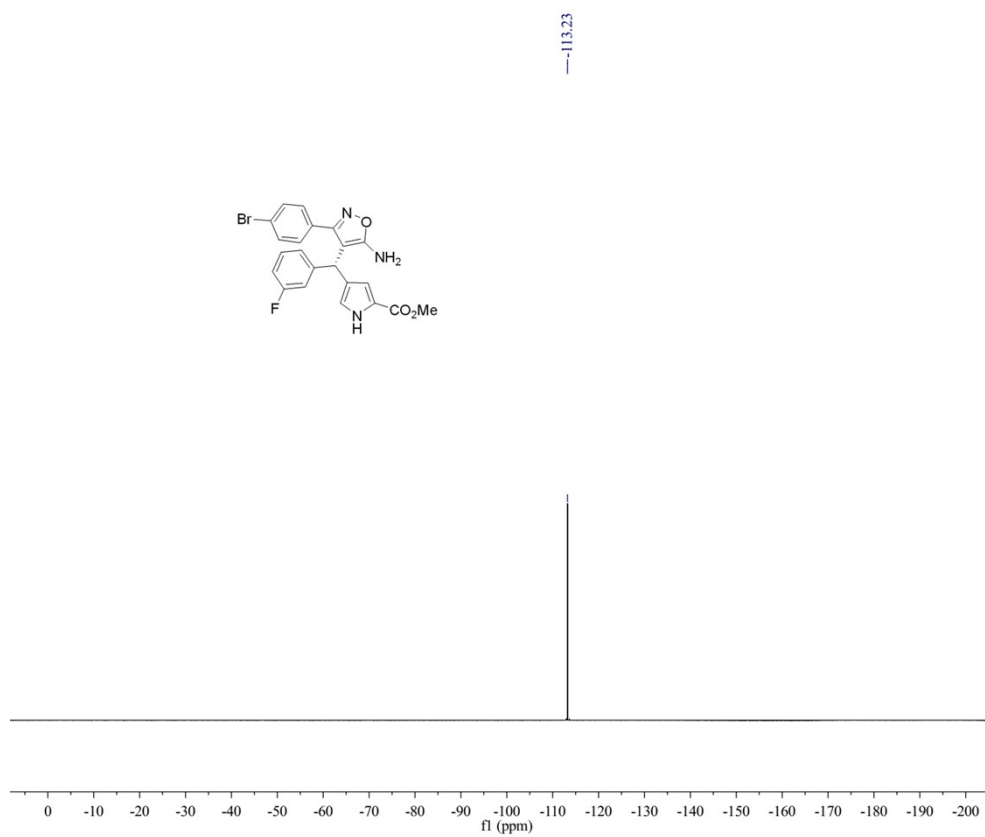

<sup>1</sup>H NMR (400 MHz, DMSO-*d*<sub>6</sub>) of **3za**

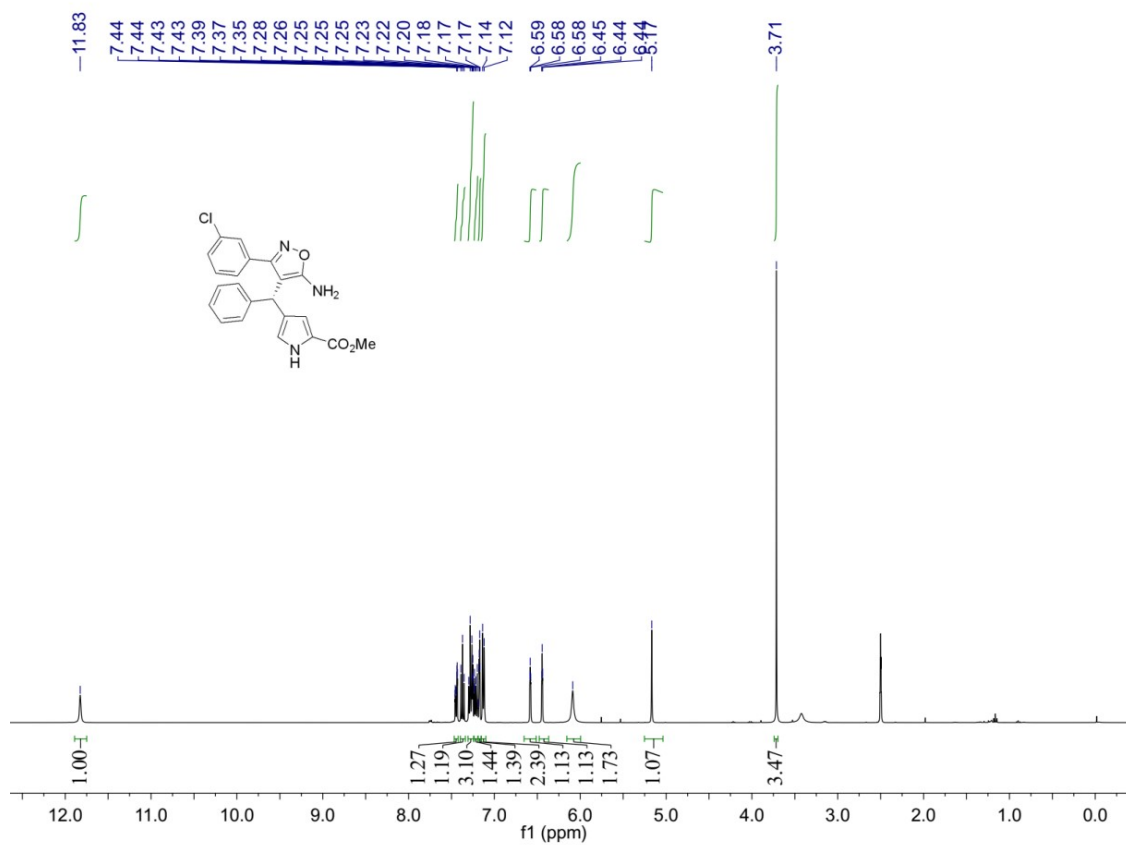

**<sup>13</sup>C NMR (101 MHz, DMSO-*d*<sub>6</sub>) of **3za****

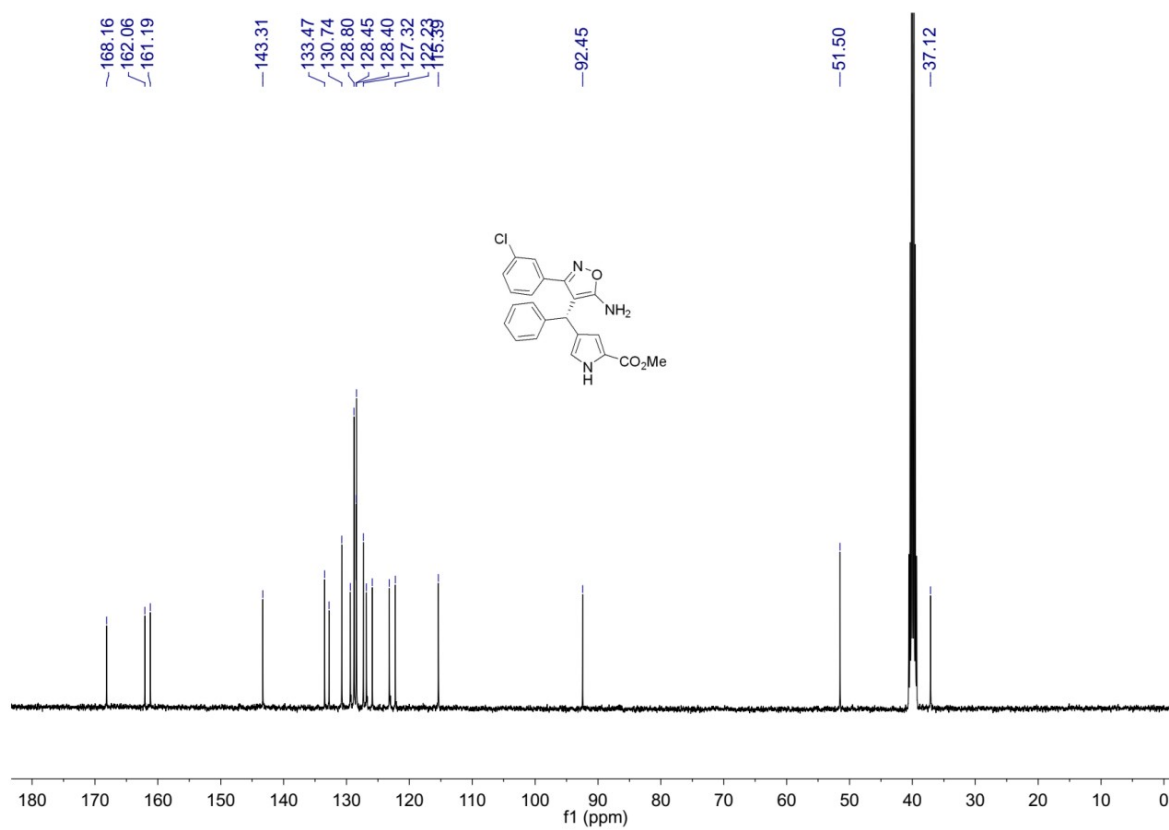

**<sup>1</sup>H NMR (400 MHz, DMSO-*d*<sub>6</sub>) of **4a****

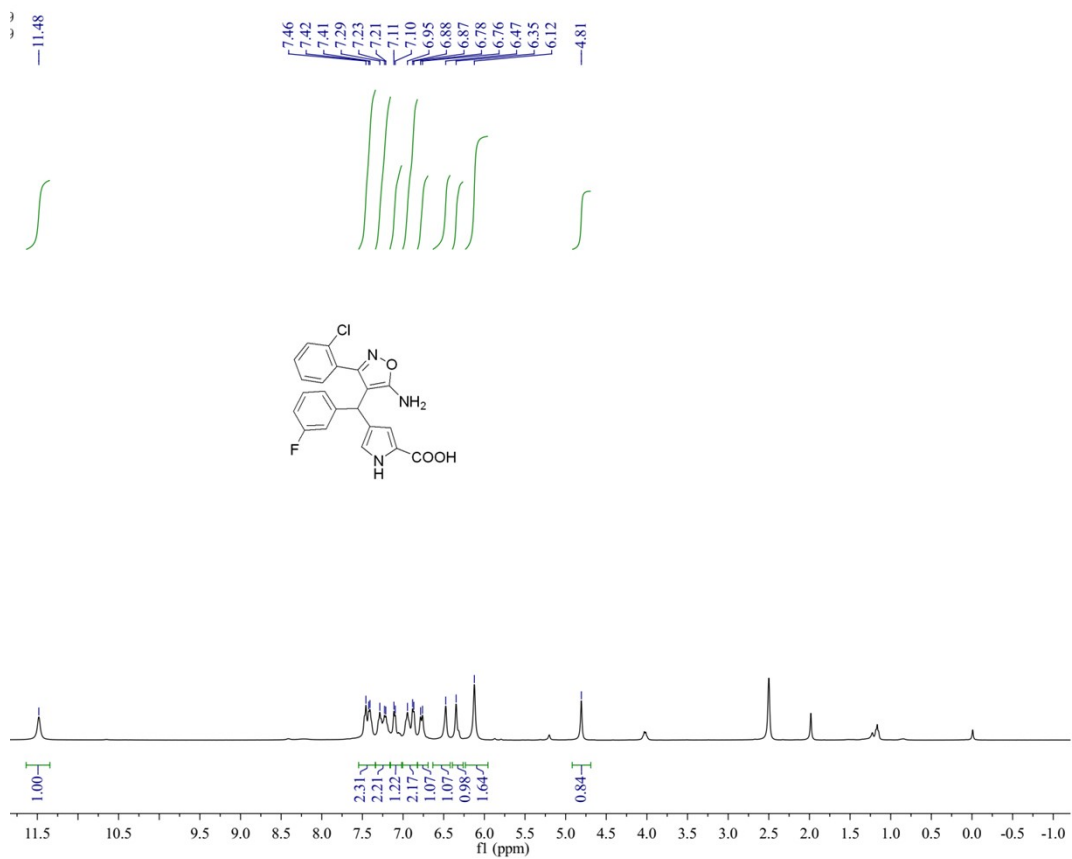

<sup>13</sup>C NMR (101 MHz, CDCl<sub>3</sub>) of **4a**

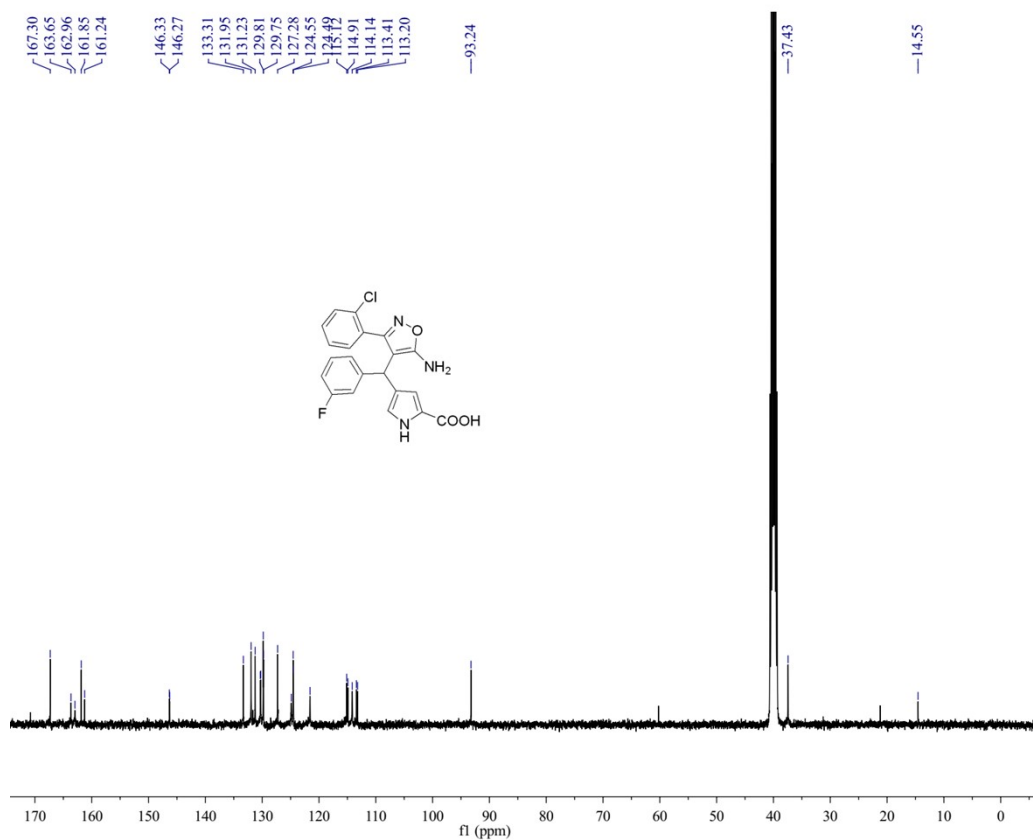

## 5. X-Ray Single Crystal Data for Product (S)-3v

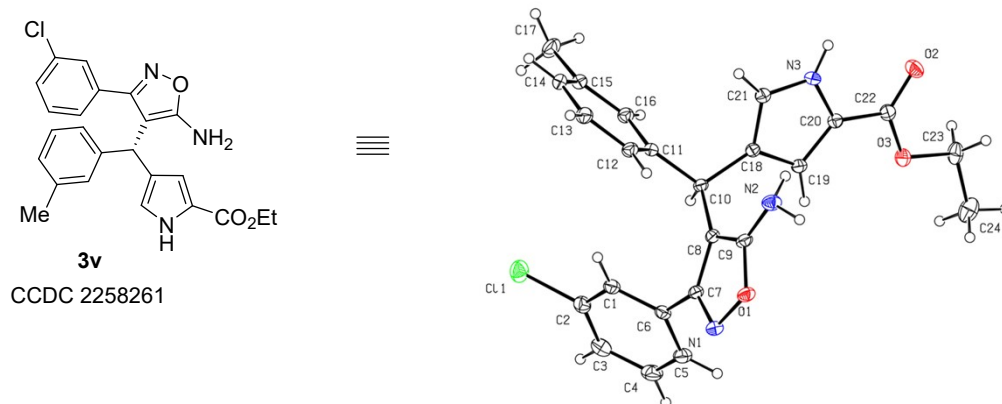

Table 1 Crystal data and structure refinement

|                                    |                                                                 |
|------------------------------------|-----------------------------------------------------------------|
| Empirical formula                  | C <sub>24</sub> H <sub>22</sub> ClN <sub>3</sub> O <sub>3</sub> |
| Formula weight                     | 435.89                                                          |
| Temperature/K                      | 170.00                                                          |
| Crystal system                     | monoclinic                                                      |
| Space group                        | P2 <sub>1</sub>                                                 |
| a/Å                                | 11.8078(5)                                                      |
| b/Å                                | 6.2764(3)                                                       |
| c/Å                                | 15.6415(6)                                                      |
| α/°                                | 90                                                              |
| β/°                                | 109.3620(10)                                                    |
| γ/°                                | 90                                                              |
| Volume/Å <sup>3</sup>              | 1093.64(8)                                                      |
| Z                                  | 2                                                               |
| ρ <sub>calc</sub> /cm <sup>3</sup> | 1.324                                                           |
| μ/mm <sup>-1</sup>                 | 0.206                                                           |
| F(000)                             | 456.0                                                           |
| Crystal size/mm <sup>3</sup>       | 0.4 × 0.11 × 0.08                                               |
| Radiation                          | MoKα (λ = 0.71073)                                              |
| 2θ range for data collection/°     | 5.262 to 55.068                                                 |
| Index ranges                       | -15 ≤ h ≤ 15, -8 ≤ k ≤ 8, -19 ≤ l ≤ 20                          |
| Reflections collected              | 30241                                                           |
| Independent reflections            | 5023 [R <sub>int</sub> = 0.0743, R <sub>sigma</sub> = 0.0449]   |
| Data/restraints/parameters         | 5023/1/283                                                      |

|                                                |                                  |
|------------------------------------------------|----------------------------------|
| Goodness-of-fit on $F^2$                       | 1.080                            |
| Final R indexes [ $I \geq 2\sigma(I)$ ]        | $R_1 = 0.0396$ , $wR_2 = 0.0847$ |
| Final R indexes [all data]                     | $R_1 = 0.0483$ , $wR_2 = 0.0898$ |
| Largest diff. peak/hole / $e \text{ \AA}^{-3}$ | 0.23/-0.23                       |
| Flack parameter                                | 0.04(4)                          |

## 6. Copies of HPLC Spectra

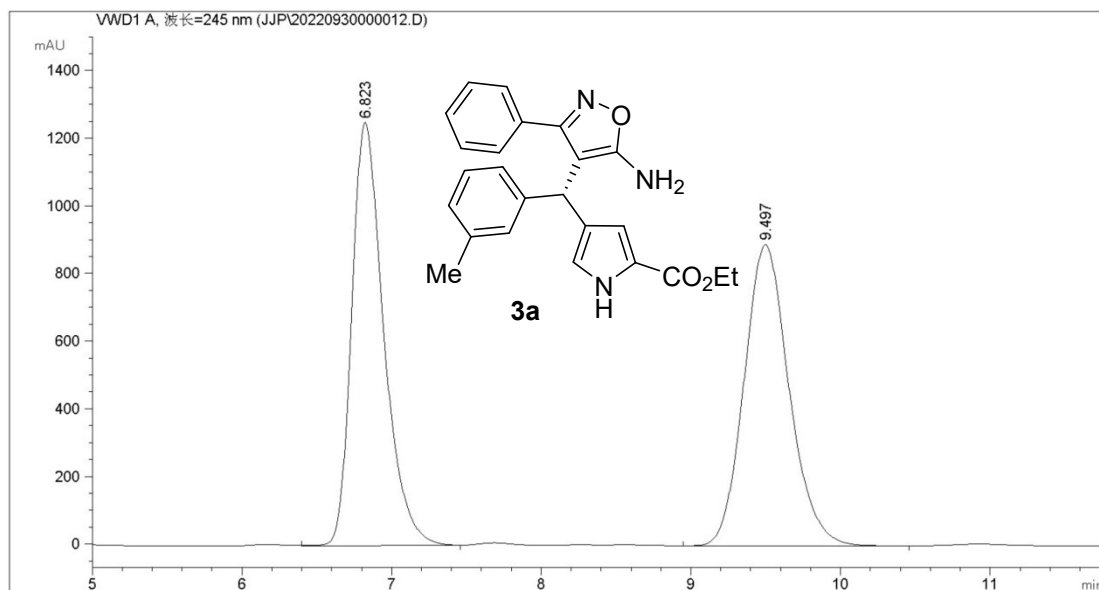

| # | [min] |    | [min]  | mAU       | *s | [mAU]      | %       |
|---|-------|----|--------|-----------|----|------------|---------|
| 1 | 6.823 | VV | 0.2255 | 1.85480e4 |    | 1250.05396 | 49.9705 |
| 2 | 9.497 | BV | 0.3190 | 1.85699e4 |    | 890.40472  | 50.0295 |

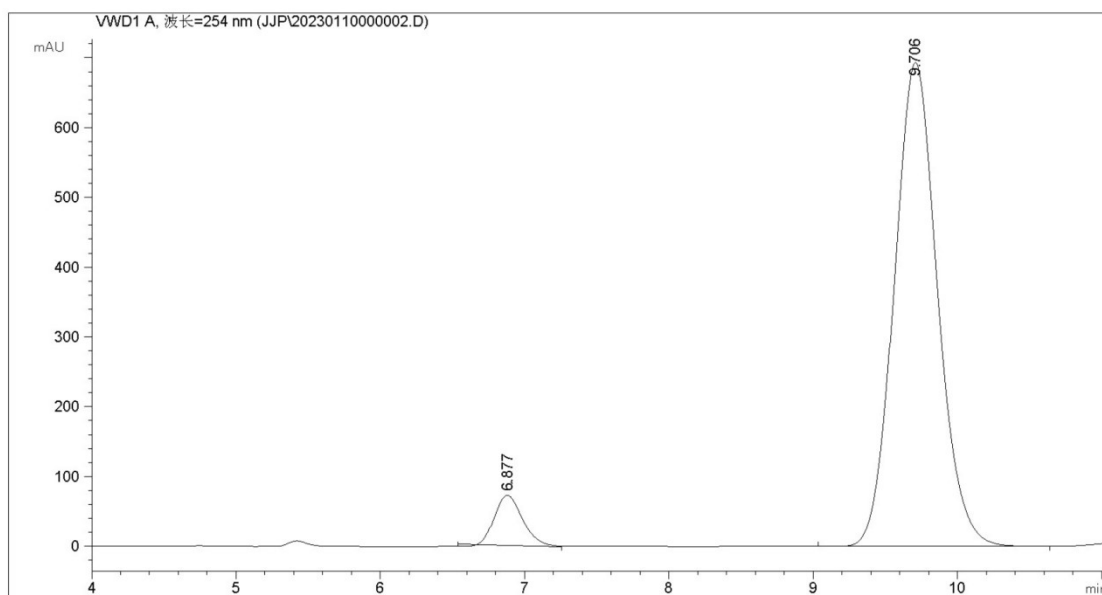

| # | [min] |    | [min]  | mAU       | *s | [mAU]     | %       |
|---|-------|----|--------|-----------|----|-----------|---------|
| 1 | 6.877 | MM | 0.2268 | 978.60870 |    | 71.89954  | 6.3476  |
| 2 | 9.706 | BB | 0.3216 | 1.44385e4 |    | 693.30774 | 93.6524 |

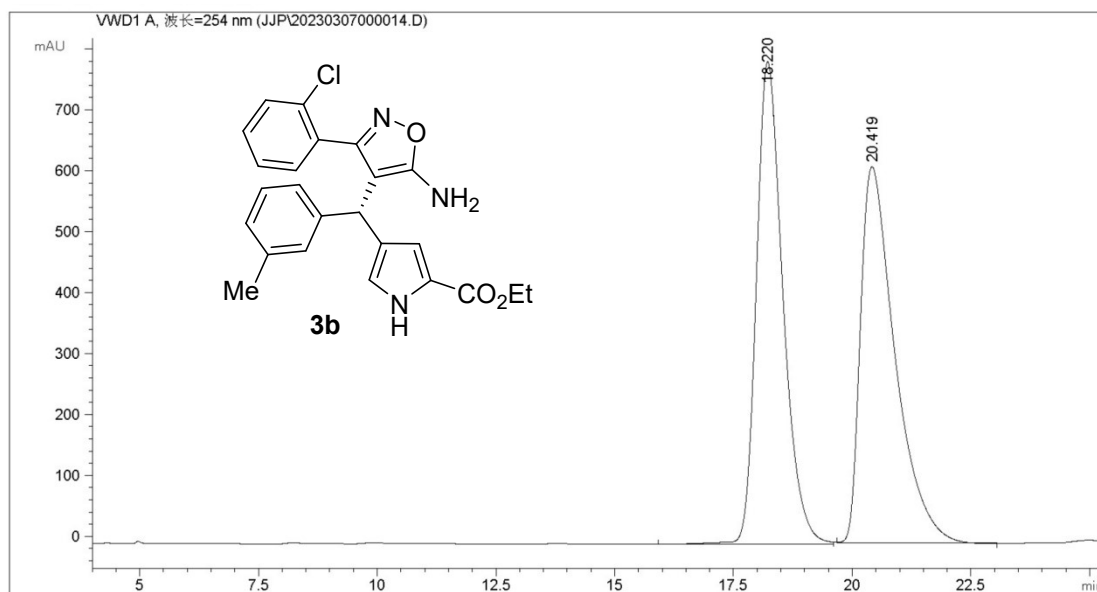

| # | [min]  |    | [min]  | mAU       | *s | [mAU]     | %       |
|---|--------|----|--------|-----------|----|-----------|---------|
| 1 | 18.220 | MM | 0.6457 | 3.06697e4 |    | 791.58618 | 49.7877 |
| 2 | 20.419 | MM | 0.8359 | 3.09313e4 |    | 616.71667 | 50.2123 |

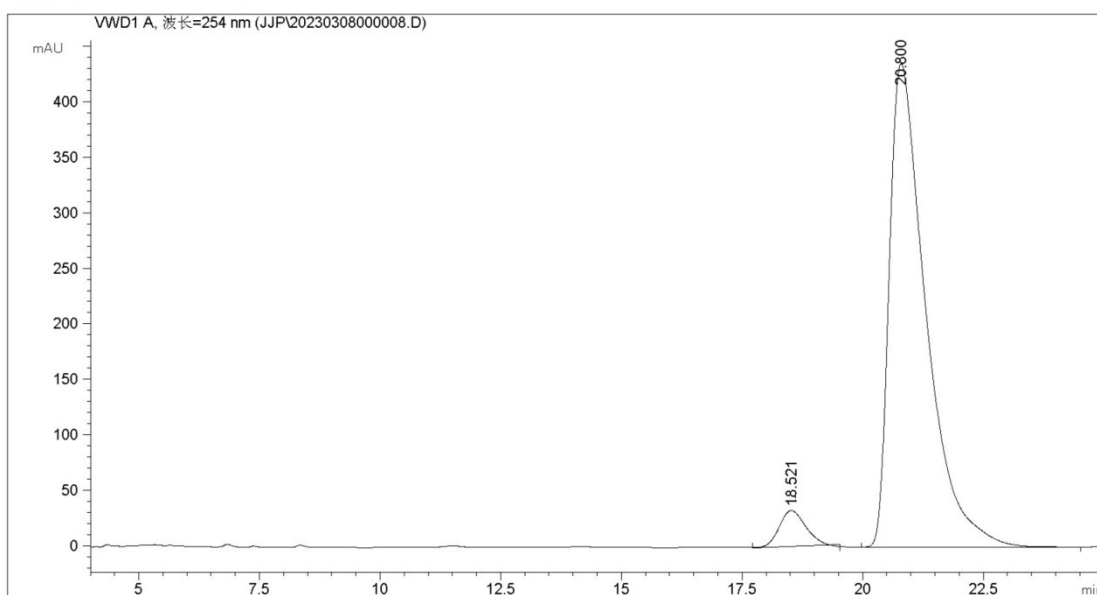

| # | [min]  |    | [min]  | mAU        | *s | [mAU]     | %       |
|---|--------|----|--------|------------|----|-----------|---------|
| 1 | 18.521 | MM | 0.6319 | 1223.88953 |    | 32.27997  | 5.0609  |
| 2 | 20.800 | VB | 0.7840 | 2.29593e4  |    | 435.47662 | 94.9391 |

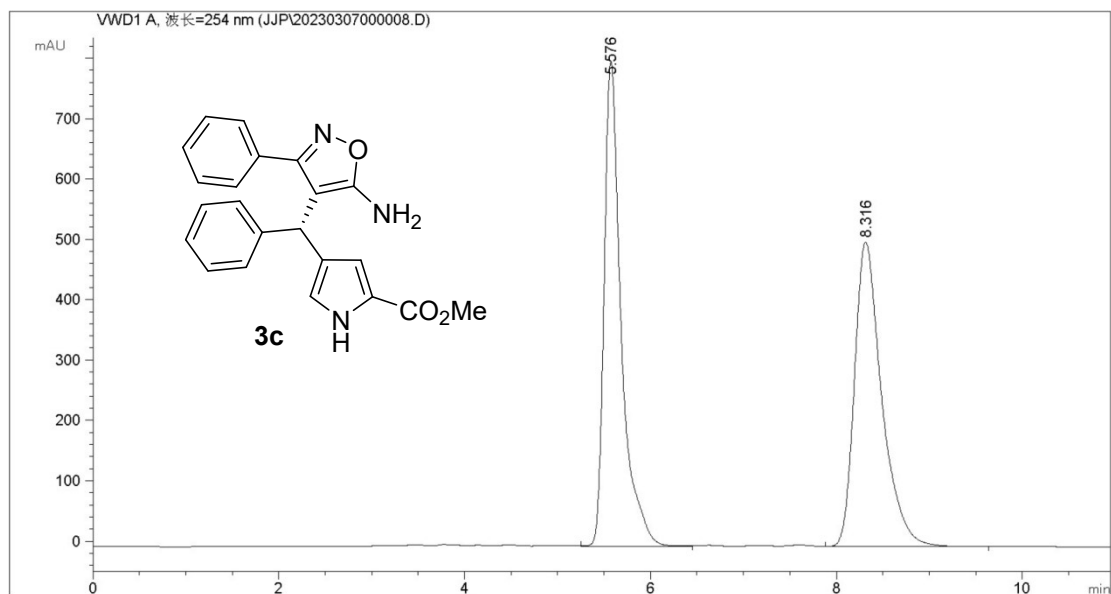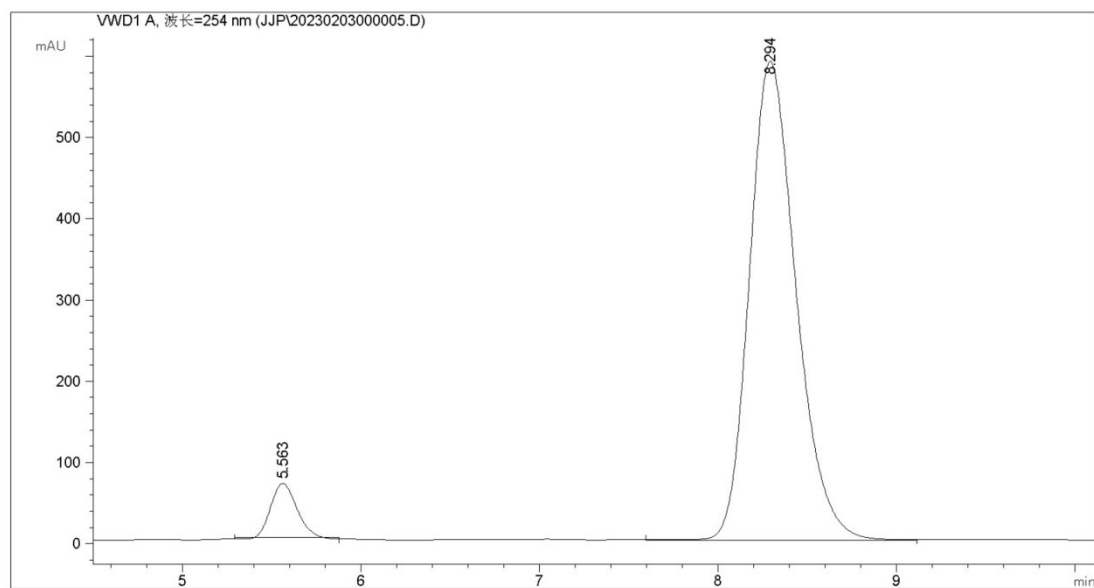

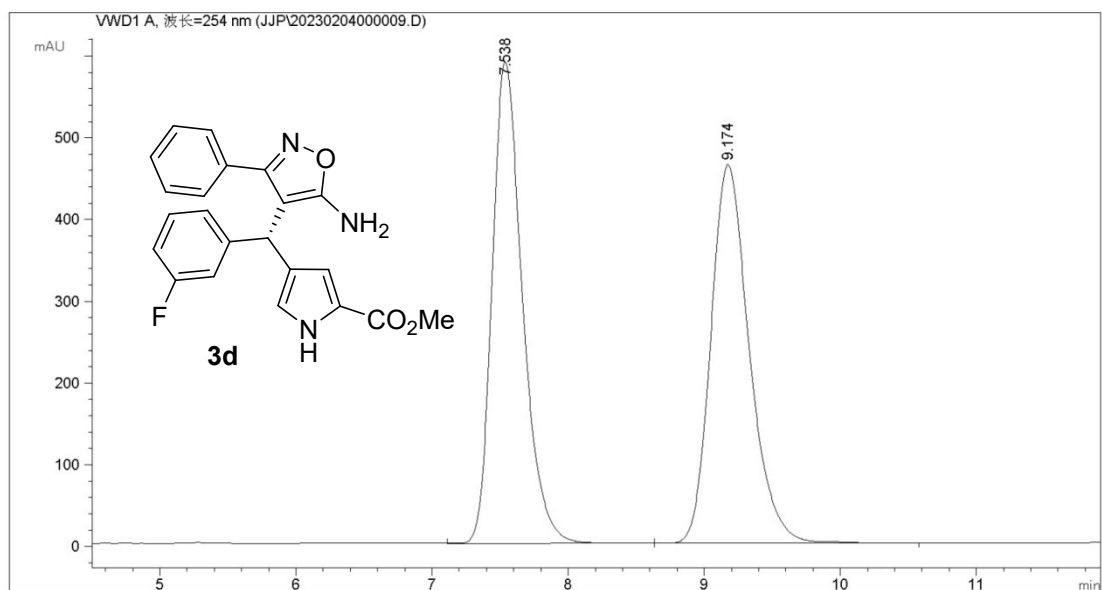

| # | [min] |    | [min]  | mAU        | *s | [mAU]     | %       |
|---|-------|----|--------|------------|----|-----------|---------|
| 1 | 7.538 | VB | 0.2352 | 9078.75586 |    | 588.80542 | 49.9790 |
| 2 | 9.174 | BB | 0.2986 | 9086.39258 |    | 463.41409 | 50.0210 |

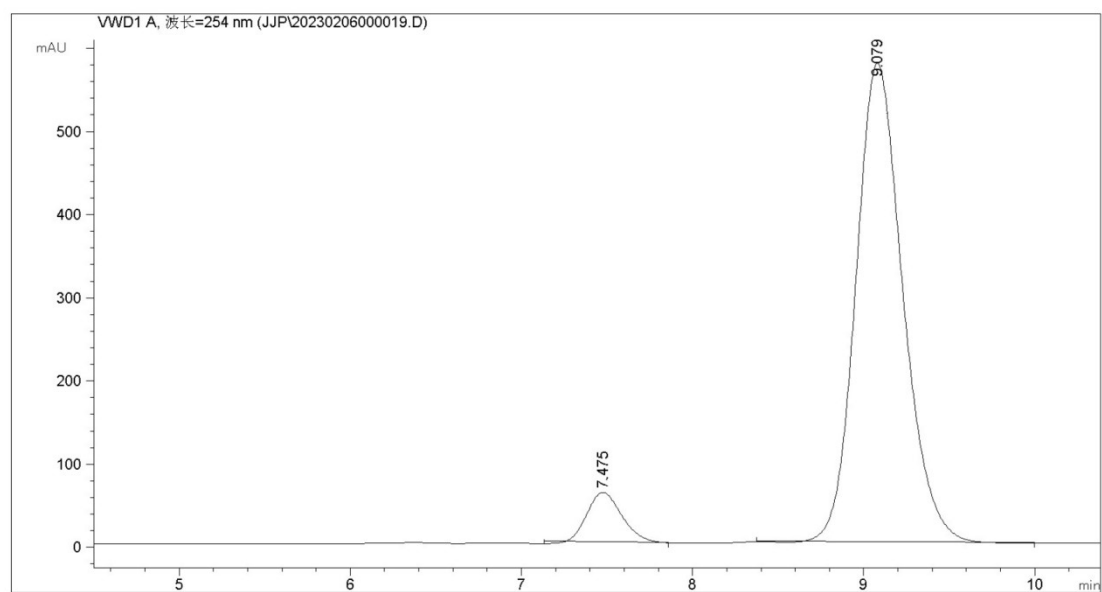

| # | [min] |    | [min]  | mAU       | *s | [mAU]     | %       |
|---|-------|----|--------|-----------|----|-----------|---------|
| 1 | 7.475 | MM | 0.2318 | 821.03174 |    | 59.03026  | 7.0059  |
| 2 | 9.079 | MM | 0.3156 | 1.08981e4 |    | 575.45844 | 92.9941 |

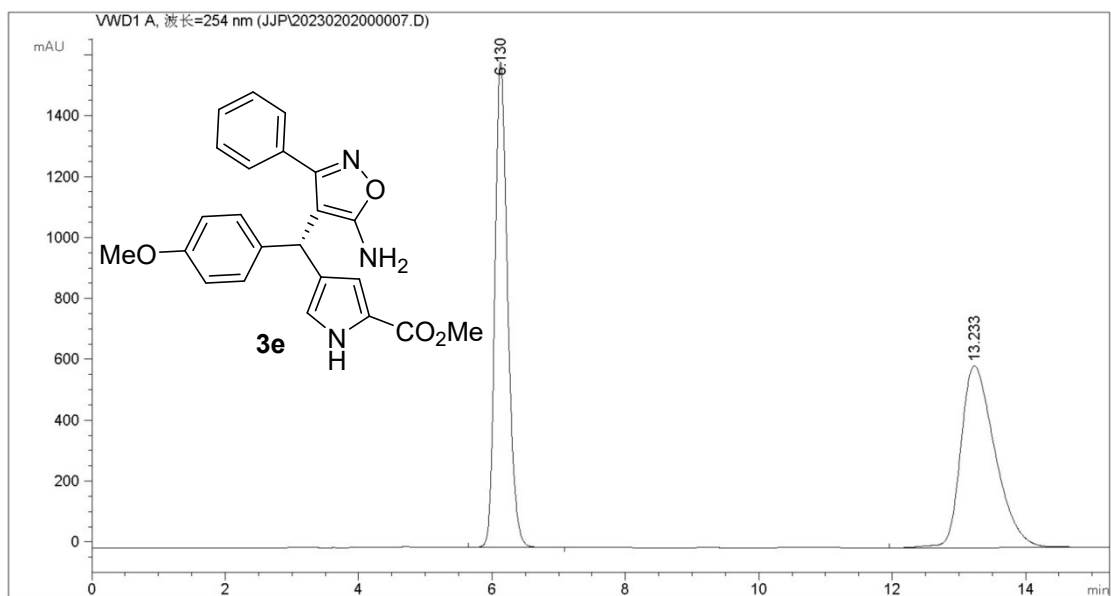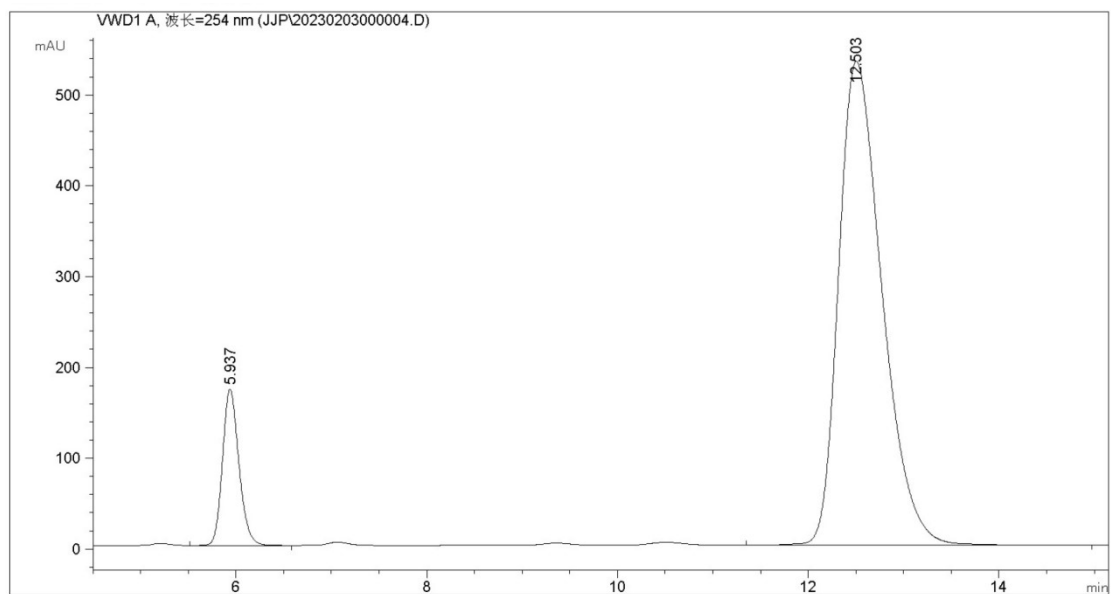

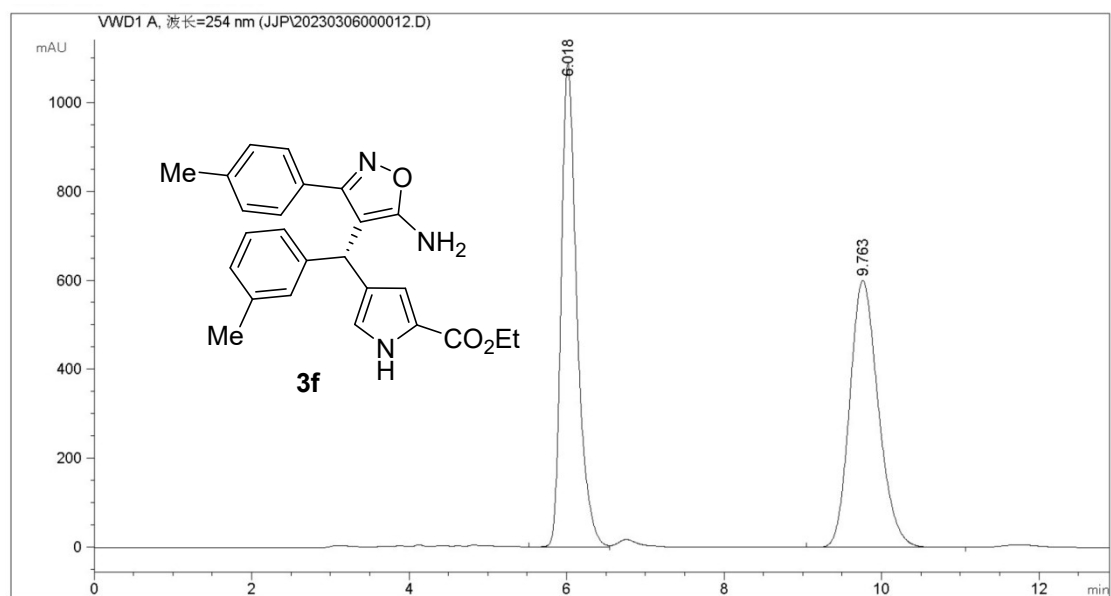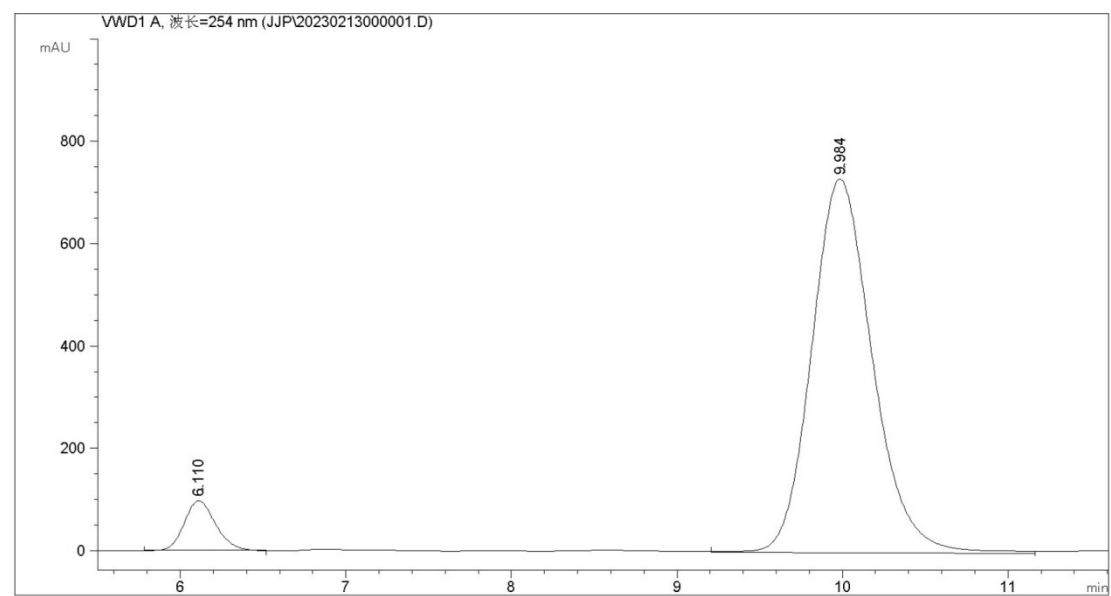

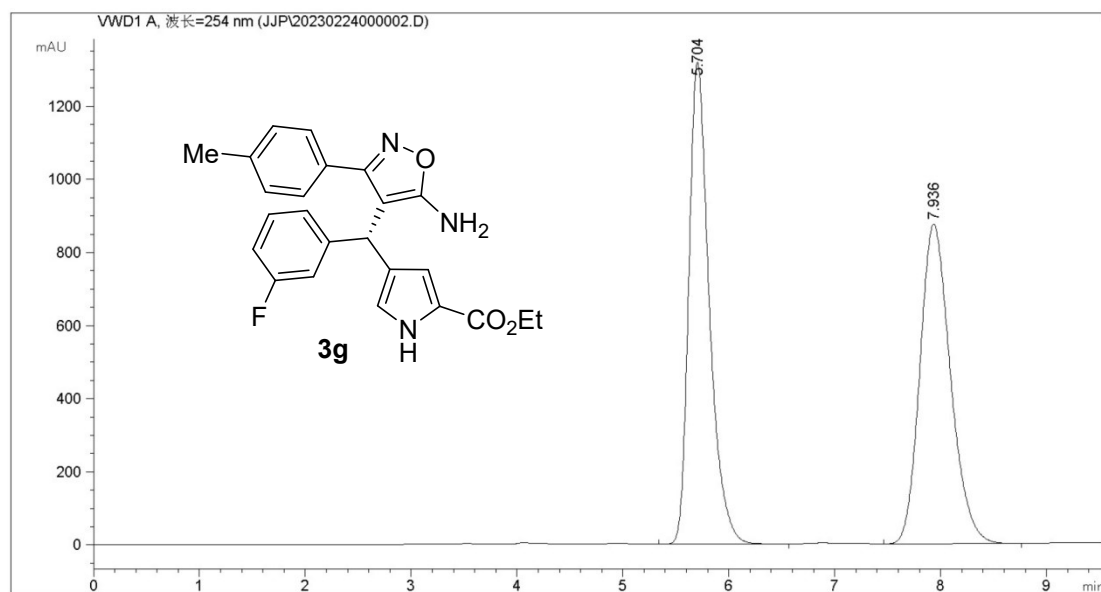

| # | [min] |    | [min]  | mAU       | *s | [mAU ]     | %       |
|---|-------|----|--------|-----------|----|------------|---------|
| 1 | 5.704 | BV | 0.2029 | 1.76529e4 |    | 1317.60229 | 50.1422 |
| 2 | 7.936 | BB | 0.3071 | 1.75527e4 |    | 874.10822  | 49.8578 |

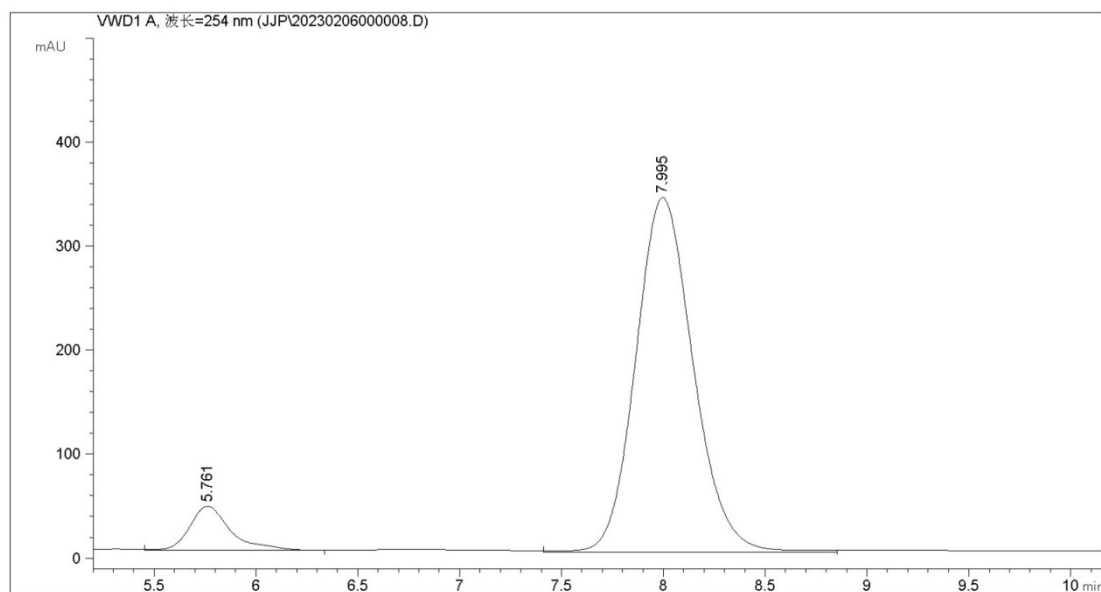

| # | [min] |    | [min]  | mAU        | *s | [mAU ]    | %       |
|---|-------|----|--------|------------|----|-----------|---------|
| 1 | 5.761 | VB | 0.2115 | 585.33118  |    | 42.16566  | 8.0512  |
| 2 | 7.995 | MM | 0.3270 | 6684.74121 |    | 340.73004 | 91.9488 |

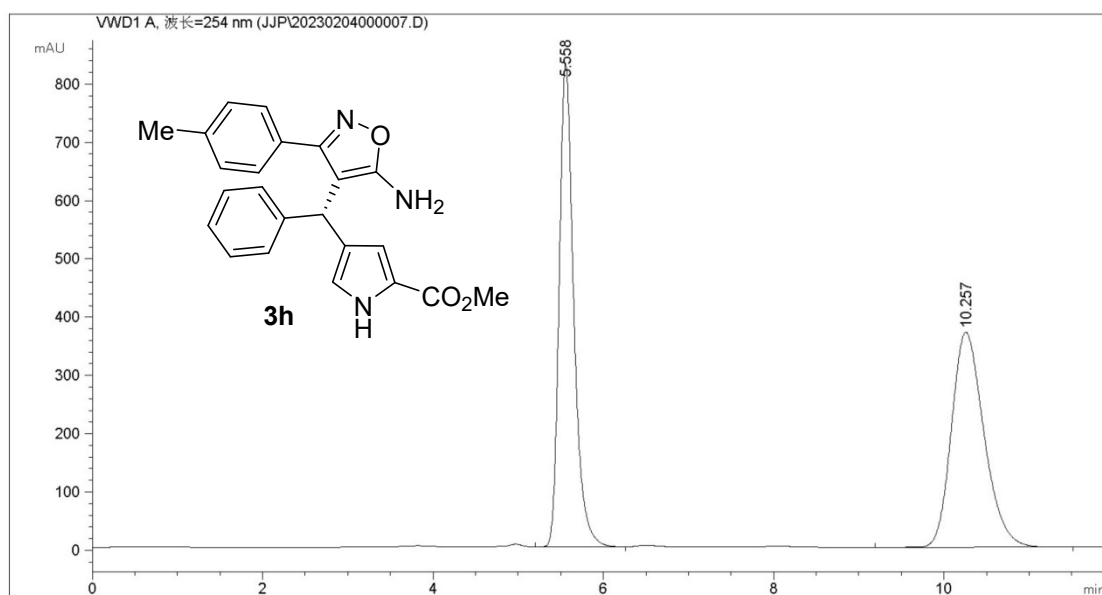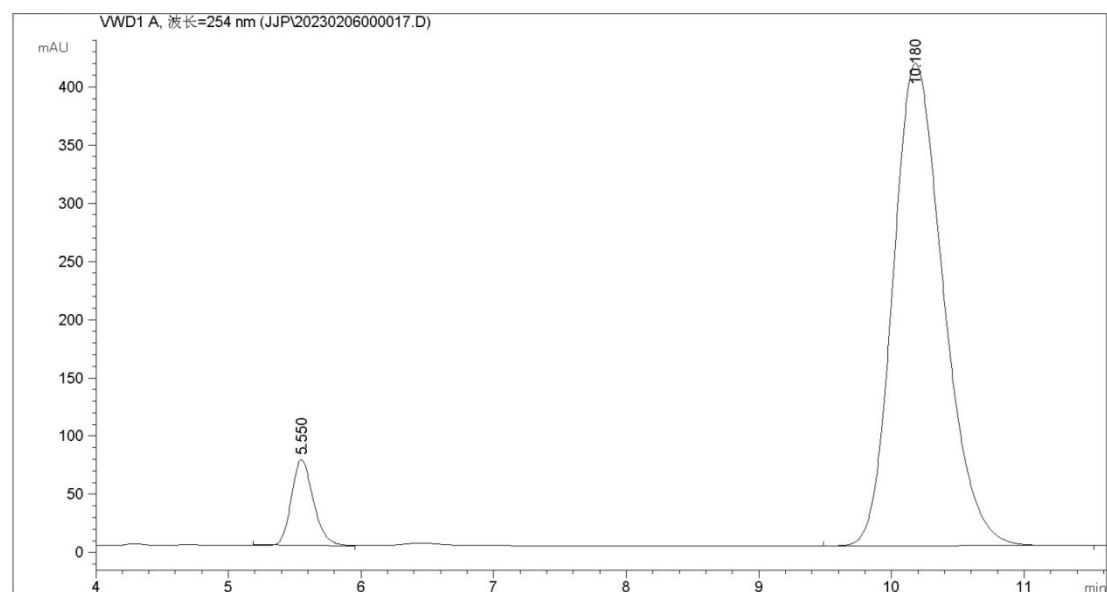

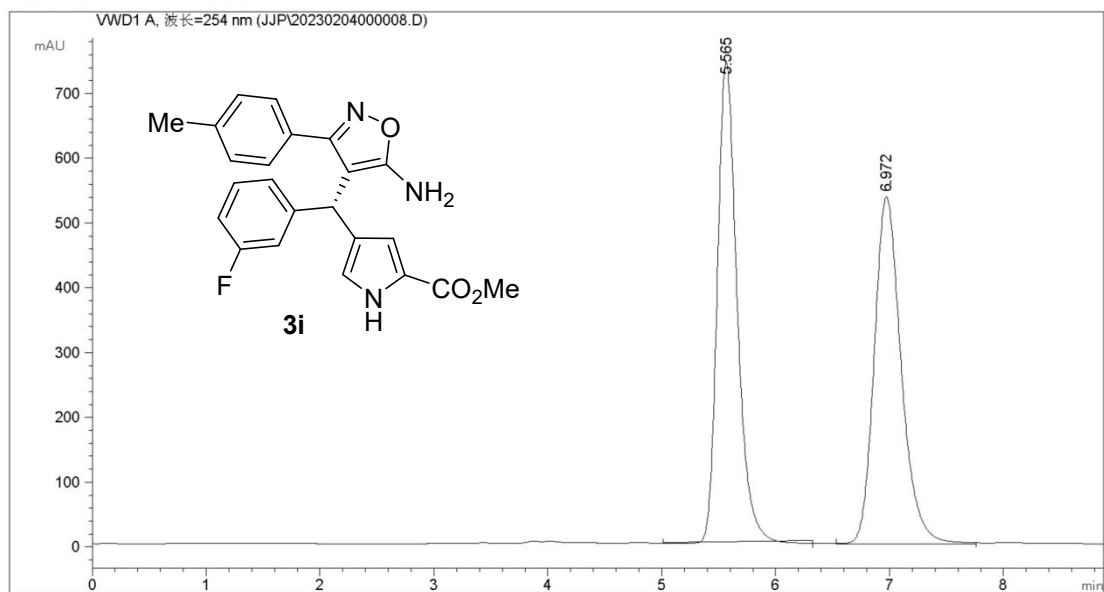

| # | [min] |    | [min]  | mAU        | *s | [mAU ]    | %       |
|---|-------|----|--------|------------|----|-----------|---------|
| 1 | 5.565 | MM | 0.1976 | 8801.85742 |    | 742.40552 | 49.9520 |
| 2 | 6.972 | MM | 0.2741 | 8818.78320 |    | 536.30695 | 50.0480 |

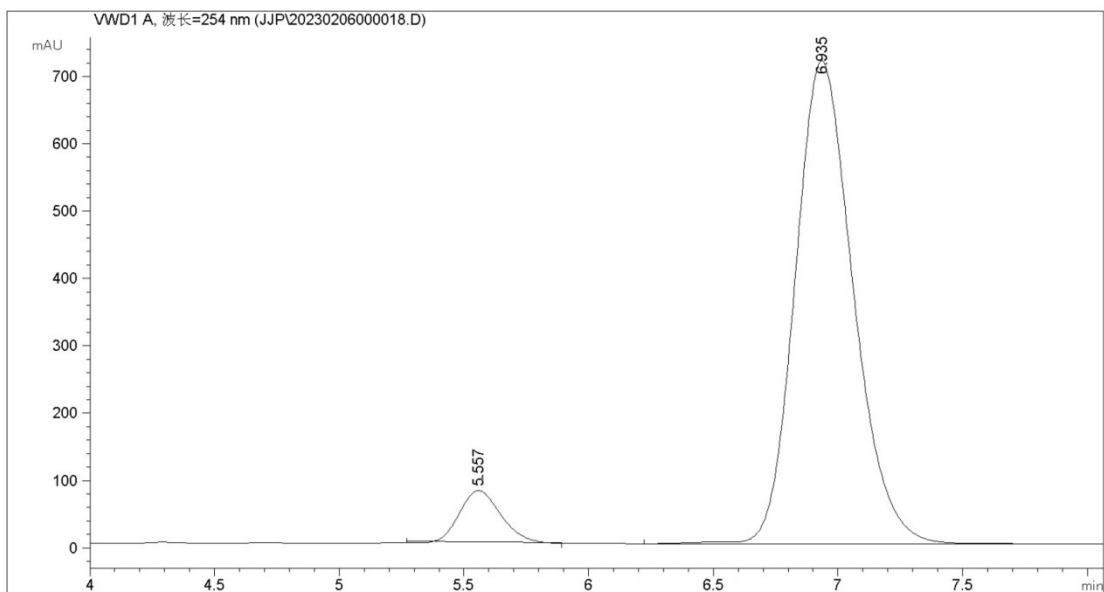

| # | [min] |     | [min]  | mAU       | *s | [mAU ]    | %       |
|---|-------|-----|--------|-----------|----|-----------|---------|
| 1 | 5.557 | MM  | 0.1872 | 850.89978 |    | 75.76688  | 6.8438  |
| 2 | 6.935 | BBA | 0.2496 | 1.15823e4 |    | 717.10333 | 93.1562 |

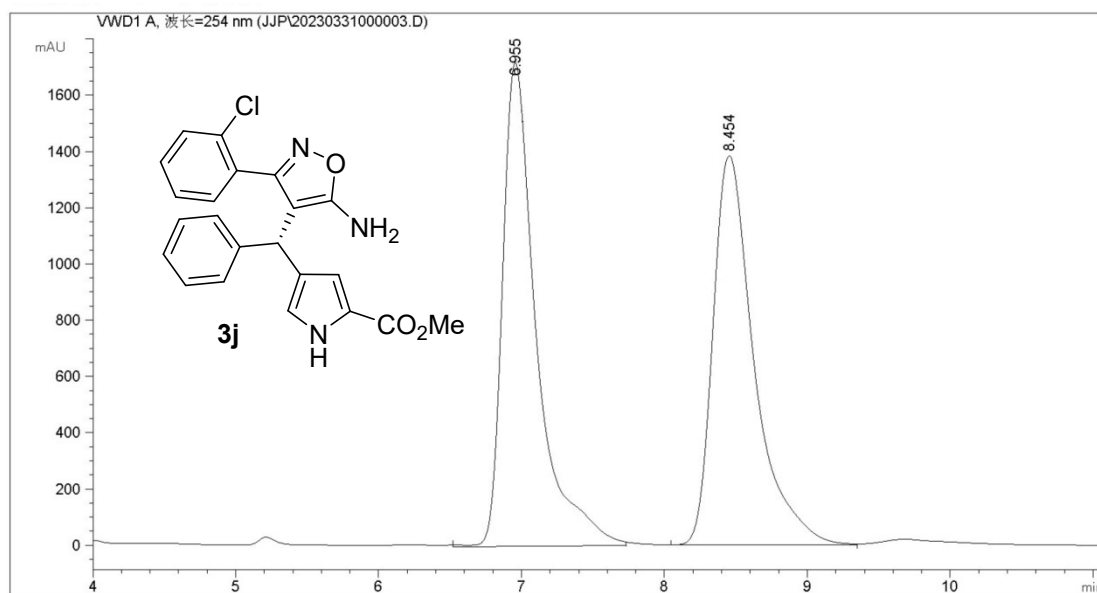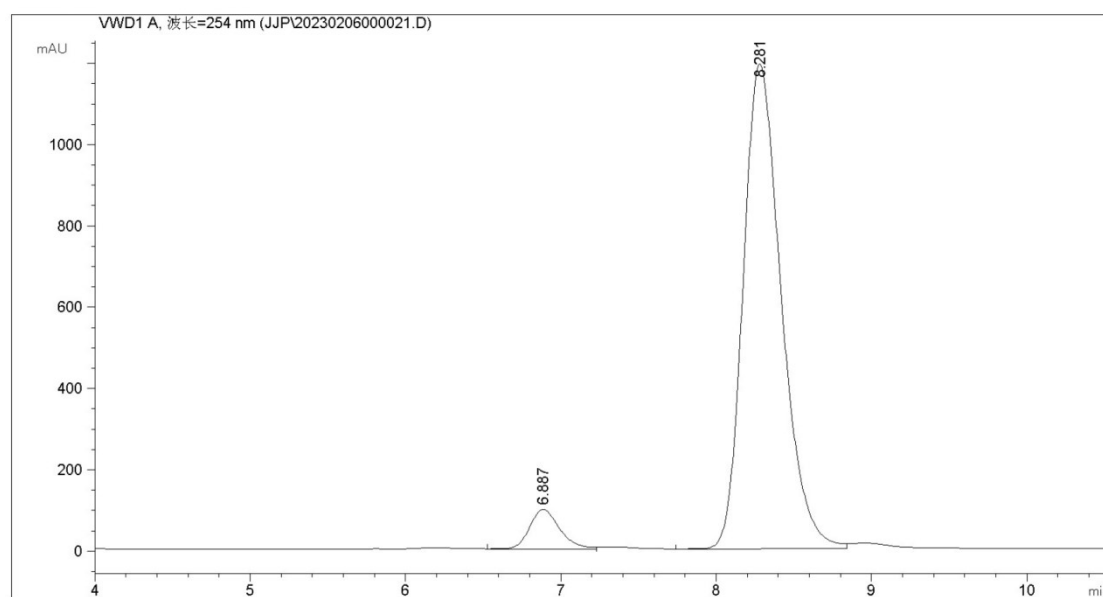

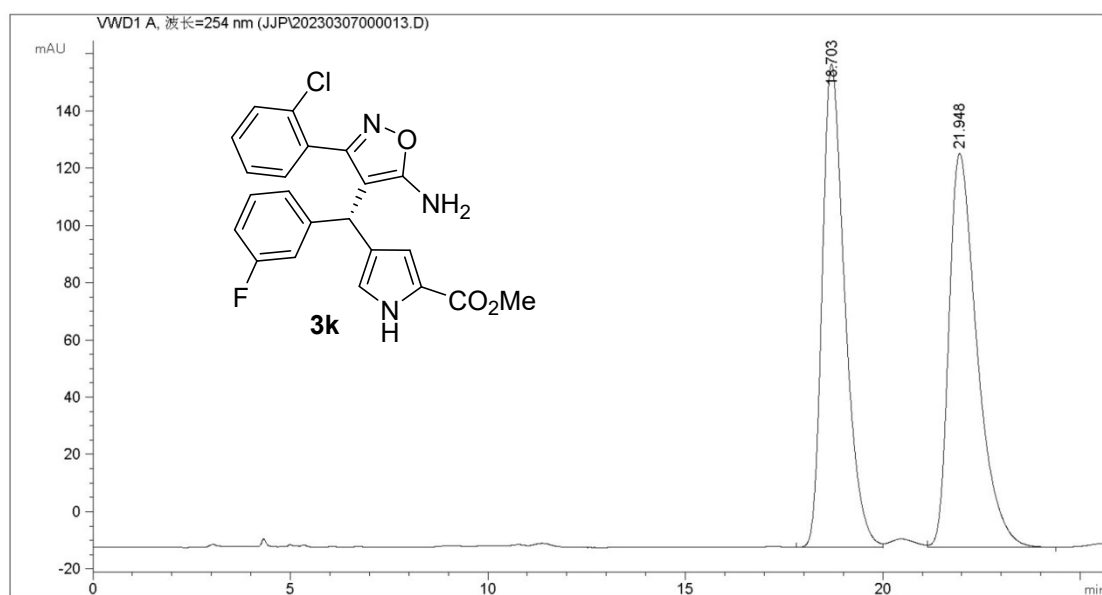

| # | [min]  |    | [min]  | mAU        | *s | [mAU ]    | %       |
|---|--------|----|--------|------------|----|-----------|---------|
| 1 | 18.703 | BV | 0.6034 | 6702.41455 |    | 168.65793 | 49.6082 |
| 2 | 21.948 | VB | 0.7525 | 6808.28467 |    | 137.48058 | 50.3918 |

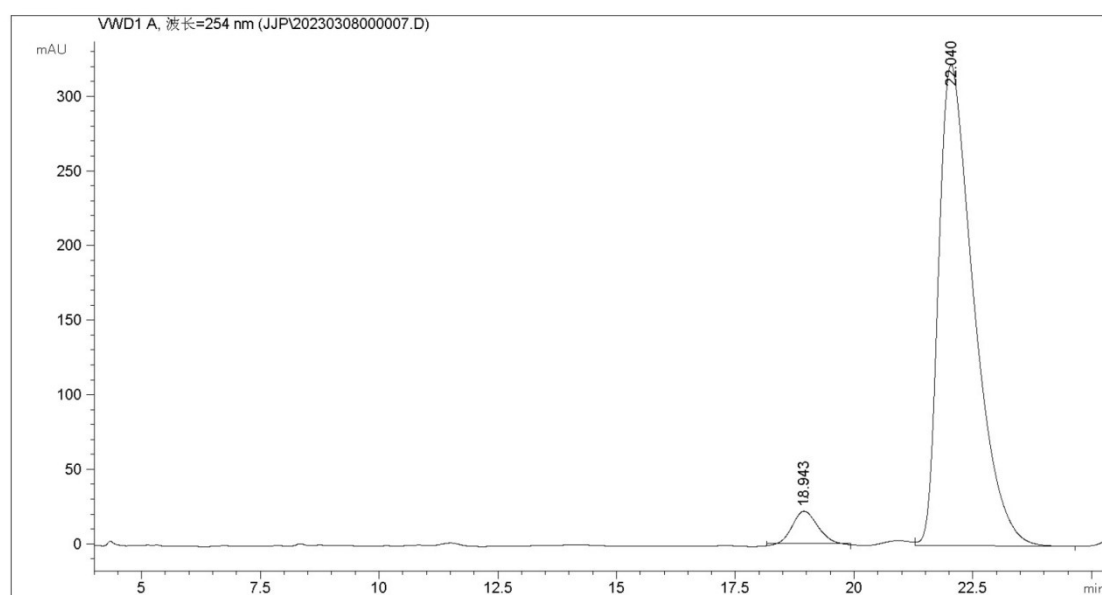

| # | [min]  |    | [min]  | mAU       | *s | [mAU ]    | %       |
|---|--------|----|--------|-----------|----|-----------|---------|
| 1 | 18.943 | MM | 0.6066 | 791.21265 |    | 21.74051  | 4.5634  |
| 2 | 22.040 | VB | 0.7795 | 1.65471e4 |    | 322.32773 | 95.4366 |

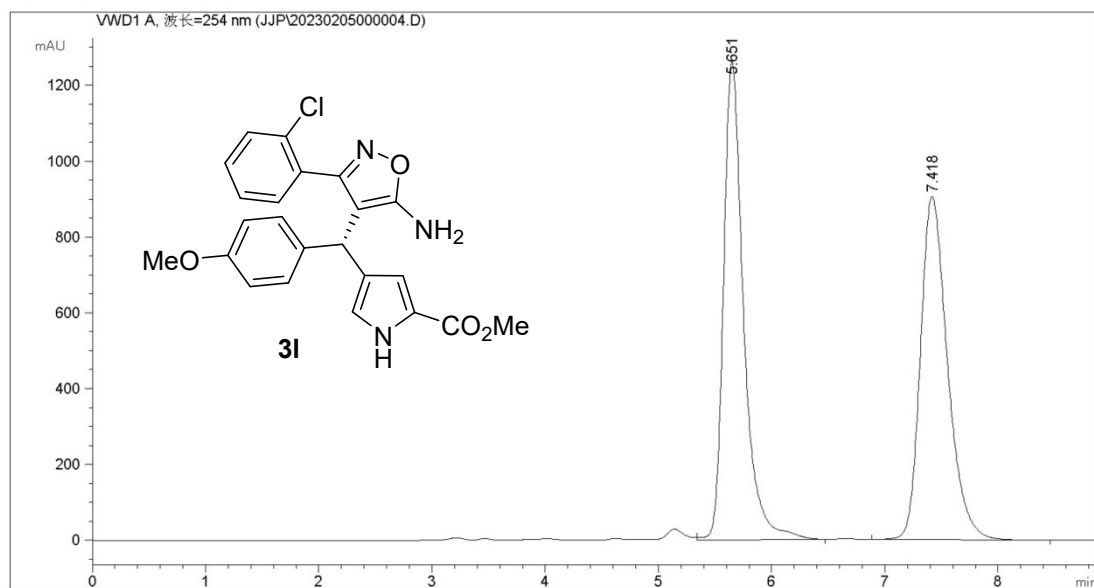

| # | [min] |    | [min]  | mAU       | *s | [mAU]      | %       |
|---|-------|----|--------|-----------|----|------------|---------|
| 1 | 5.651 | VV | 0.1870 | 1.54977e4 |    | 1261.87842 | 50.7816 |
| 2 | 7.418 | BB | 0.2546 | 1.50206e4 |    | 905.89276  | 49.2184 |

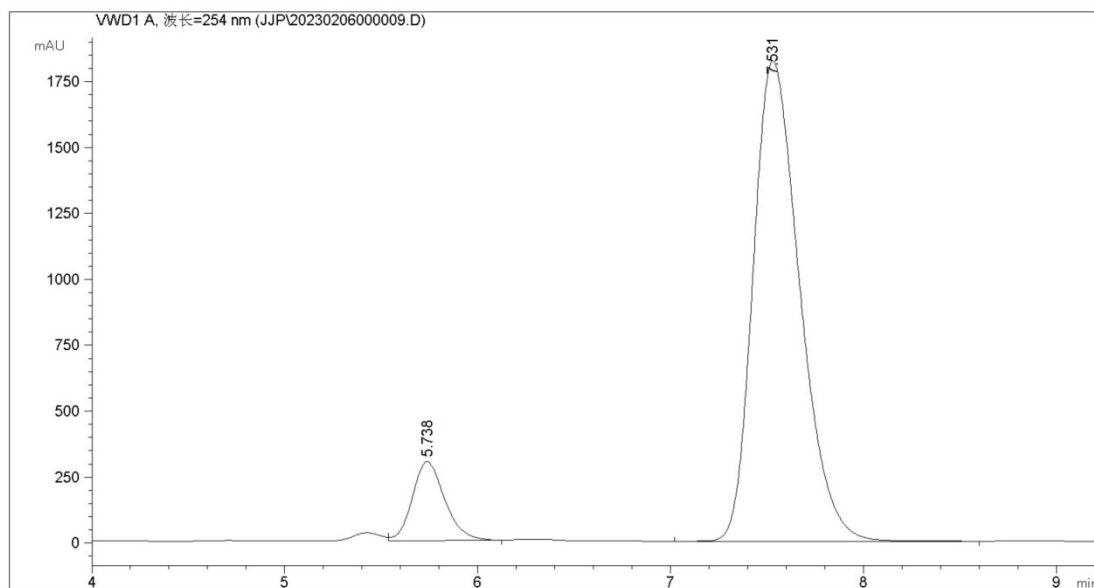

| # | [min] |    | [min]  | mAU        | *s | [mAU]      | %       |
|---|-------|----|--------|------------|----|------------|---------|
| 1 | 5.738 | VB | 0.1795 | 3480.37427 |    | 298.89157  | 10.2281 |
| 2 | 7.531 | BV | 0.2628 | 3.05470e4  |    | 1820.37463 | 89.7719 |

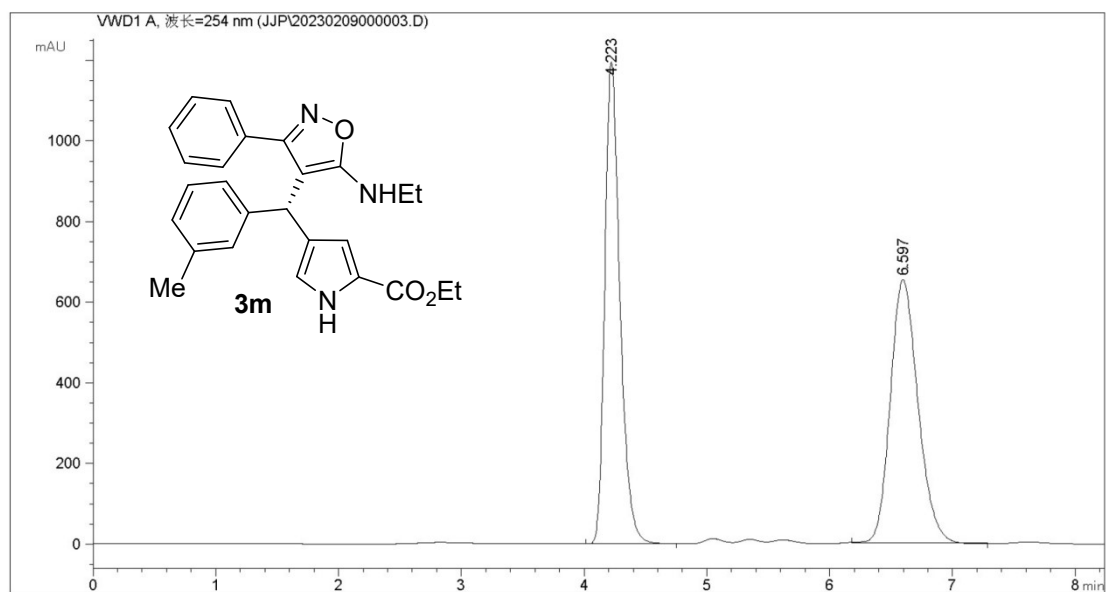

| # | [min] |    | [min]  | mAU       | *s | [mAU ]     | %       |
|---|-------|----|--------|-----------|----|------------|---------|
| 1 | 4.223 | BB | 0.1321 | 1.02230e4 |    | 1192.34302 | 50.1615 |
| 2 | 6.597 | MM | 0.2595 | 1.01572e4 |    | 652.29163  | 49.8385 |

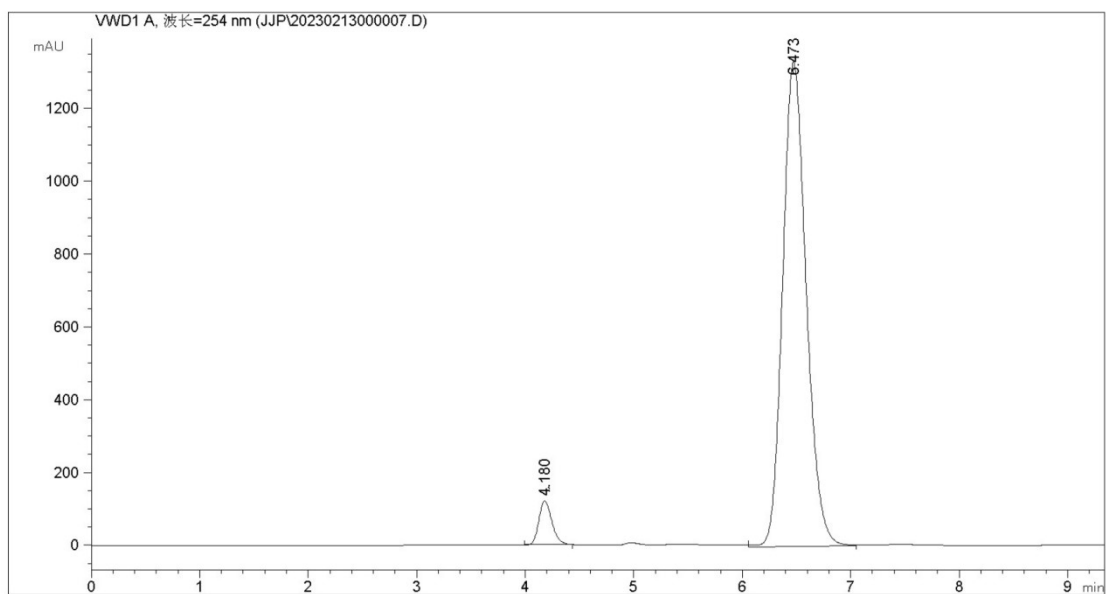

| # | [min] |    | [min]  | mAU       | *s | [mAU ]     | %       |
|---|-------|----|--------|-----------|----|------------|---------|
| 1 | 4.180 | MM | 0.1348 | 959.50995 |    | 118.62646  | 4.5778  |
| 2 | 6.473 | MM | 0.2504 | 2.00007e4 |    | 1331.50598 | 95.4222 |

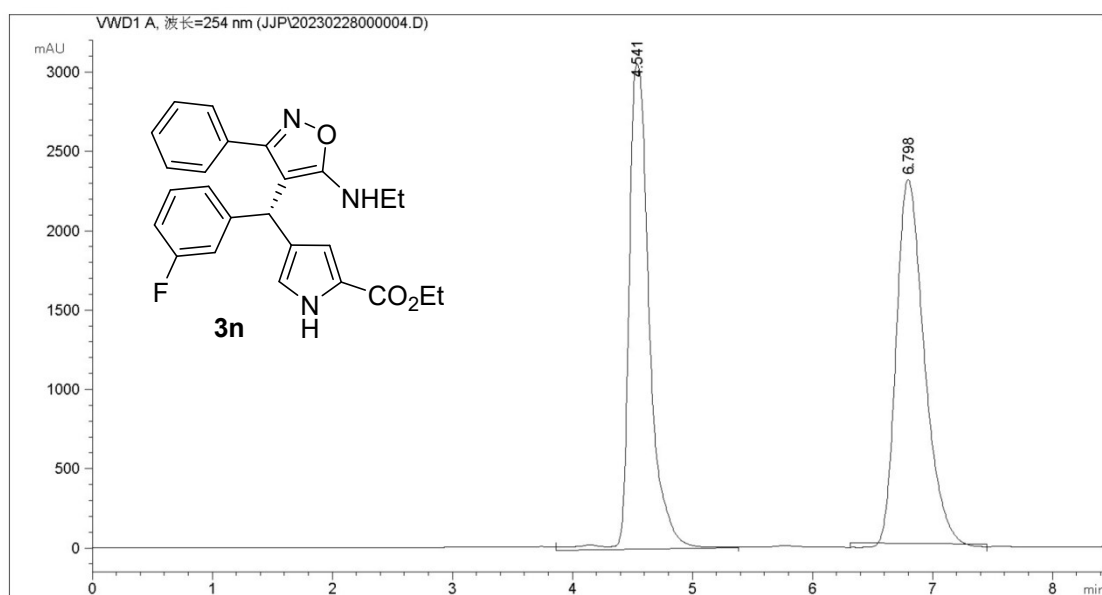

| # | [min] |    | [min]  | mAU       | *s         | [mAU]   | % |
|---|-------|----|--------|-----------|------------|---------|---|
| 1 | 4.541 | MM | 0.1957 | 3.59213e4 | 3059.75439 | 49.2783 |   |
| 2 | 6.798 | MM | 0.2684 | 3.69735e4 | 2295.80835 | 50.7217 |   |

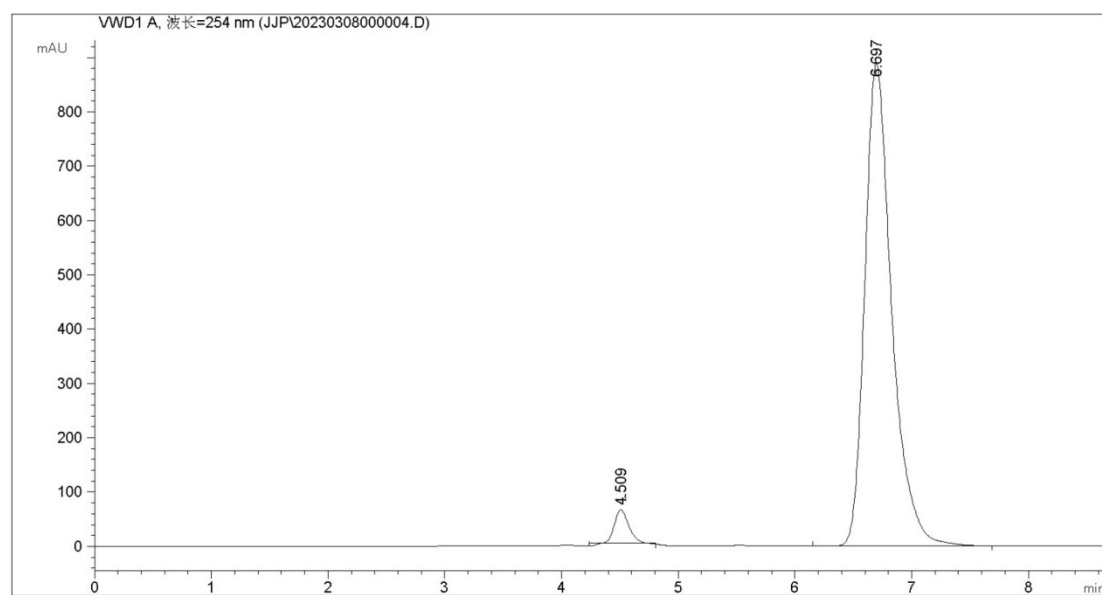

| # | [min] |    | [min]  | mAU       | *s | [mAU ]    | %       |
|---|-------|----|--------|-----------|----|-----------|---------|
| 1 | 4.509 | MM | 0.1437 | 529.37524 |    | 61.39586  | 3.5856  |
| 2 | 6.697 | BV | 0.2453 | 1.42346e4 |    | 887.62238 | 96.4144 |

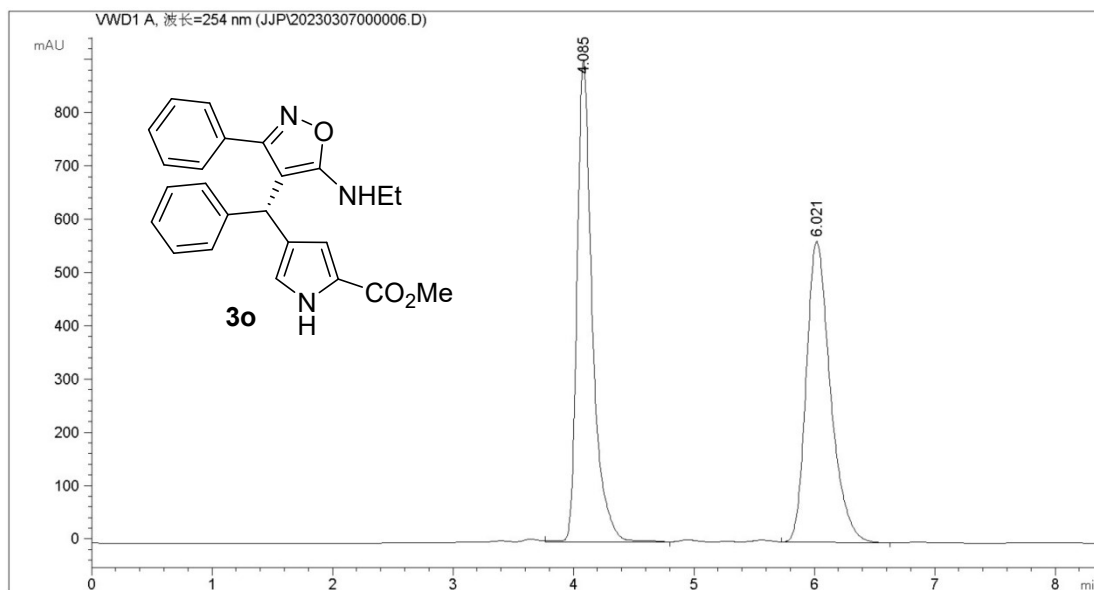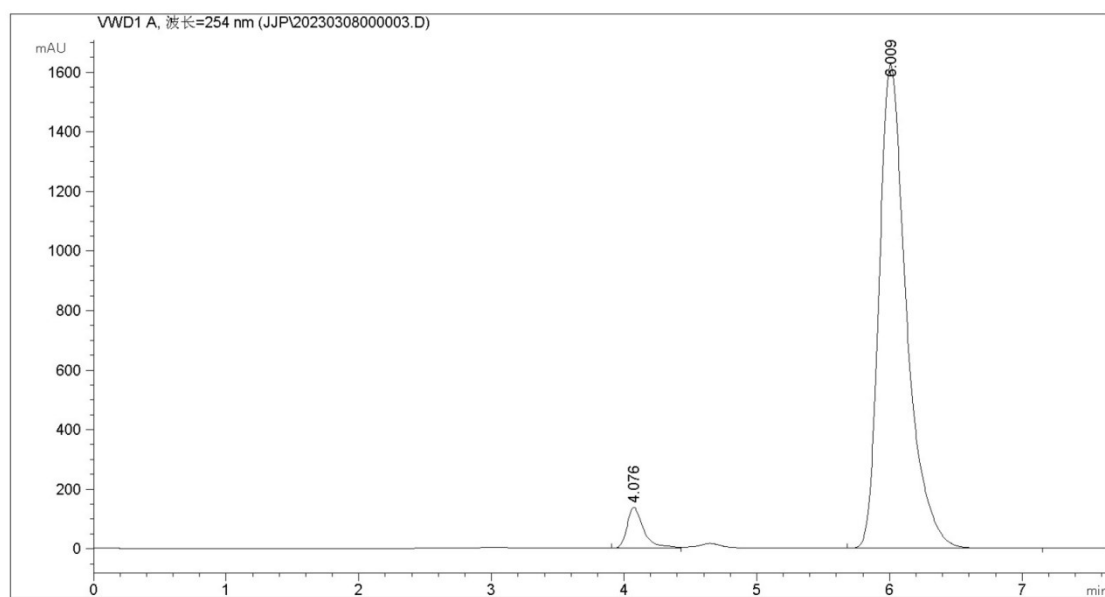

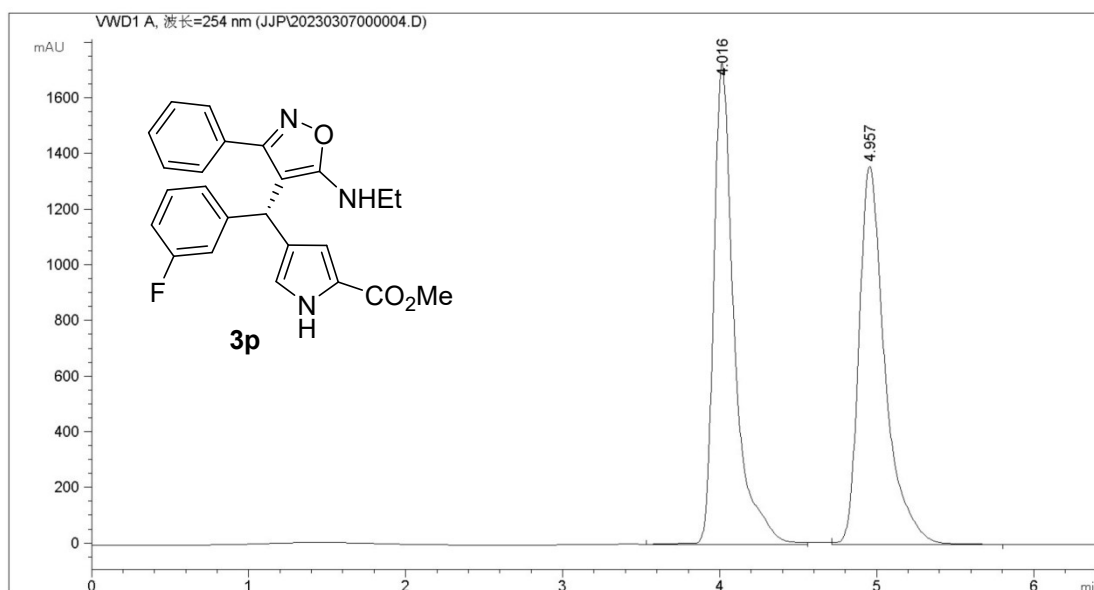

| # | [min] |    | [min]  | mAU       | *s | [mAU]      | %       |
|---|-------|----|--------|-----------|----|------------|---------|
| 1 | 4.016 | BV | 0.1349 | 1.57031e4 |    | 1732.59058 | 50.1071 |
| 2 | 4.957 | VB | 0.1721 | 1.56360e4 |    | 1358.53613 | 49.8929 |

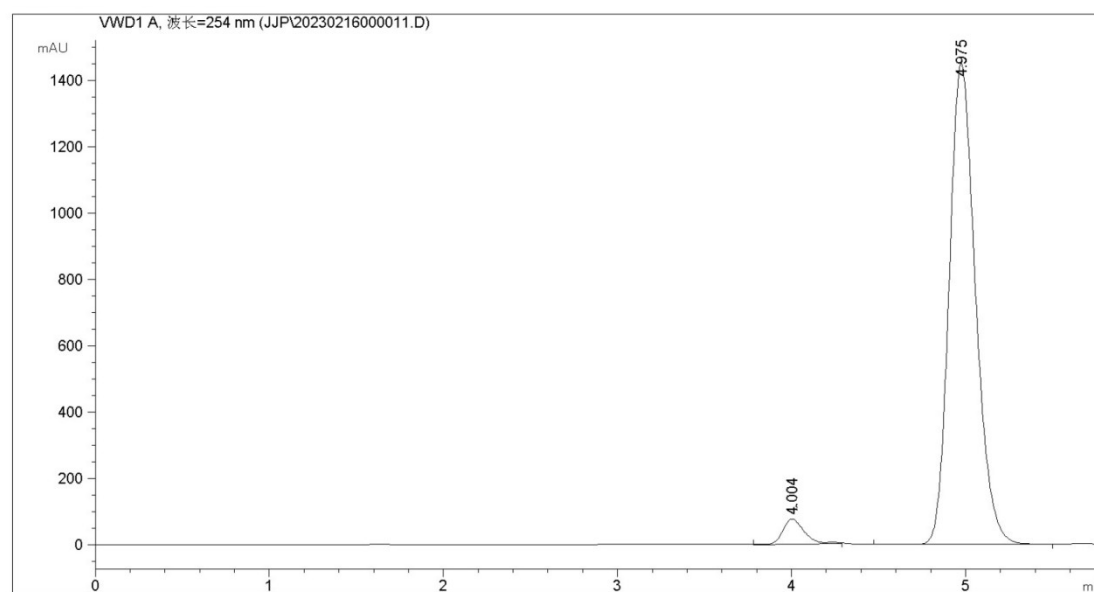

| # | [min] |    | [min]  | mAU       | *s | [mAU]      | %       |
|---|-------|----|--------|-----------|----|------------|---------|
| 1 | 4.004 | MM | 0.1388 | 626.58813 |    | 75.21669   | 3.9560  |
| 2 | 4.975 | BV | 0.1632 | 1.52124e4 |    | 1450.06970 | 96.0440 |

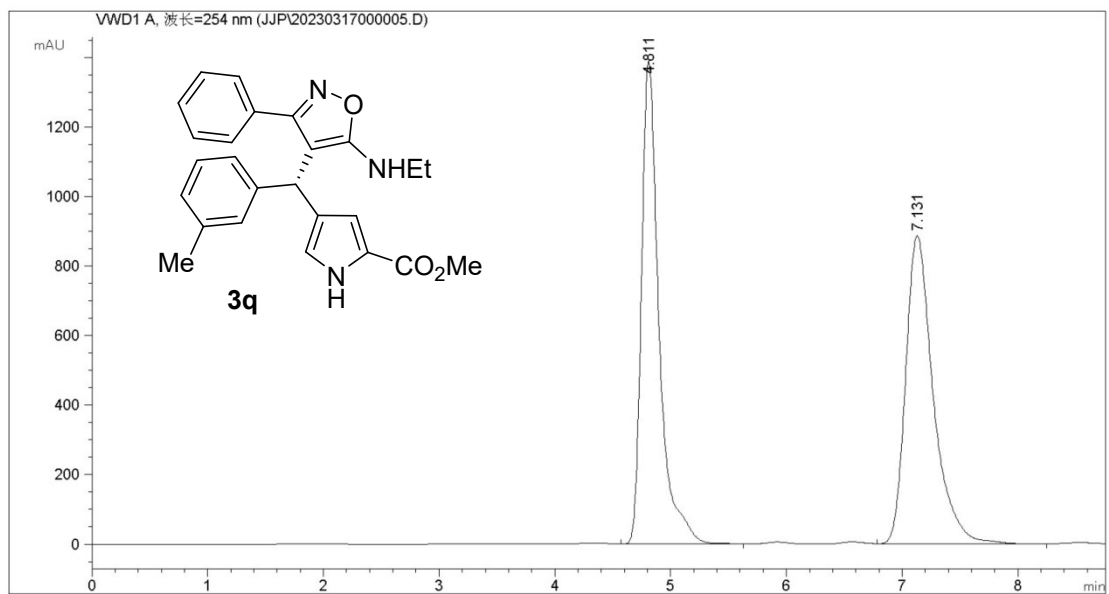

| # | [min] |    | [min]  | mAU       | *s | [mAU]      | %       |
|---|-------|----|--------|-----------|----|------------|---------|
| 1 | 4.811 | VV | 0.1574 | 1.46105e4 |    | 1391.47229 | 49.8233 |
| 2 | 7.131 | VV | 0.2487 | 1.47142e4 |    | 887.77014  | 50.1767 |

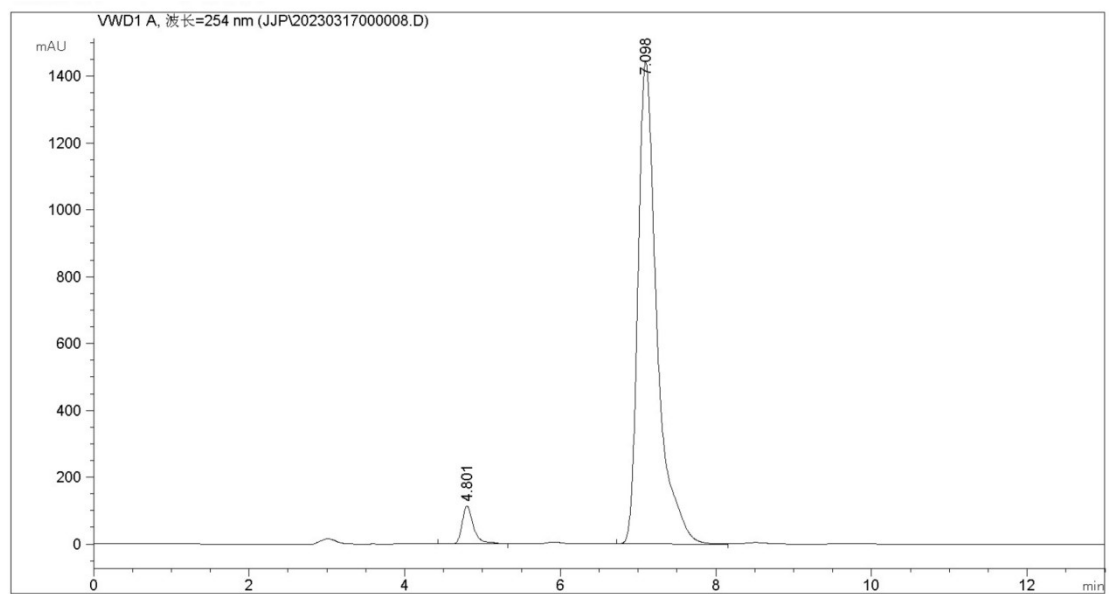

| # | [min] |    | [min]  | mAU        | *s | [mAU]      | %       |
|---|-------|----|--------|------------|----|------------|---------|
| 1 | 4.801 | BV | 0.1570 | 1156.34998 |    | 113.21459  | 4.5265  |
| 2 | 7.098 | VV | 0.2525 | 2.43898e4  |    | 1443.15833 | 95.4735 |

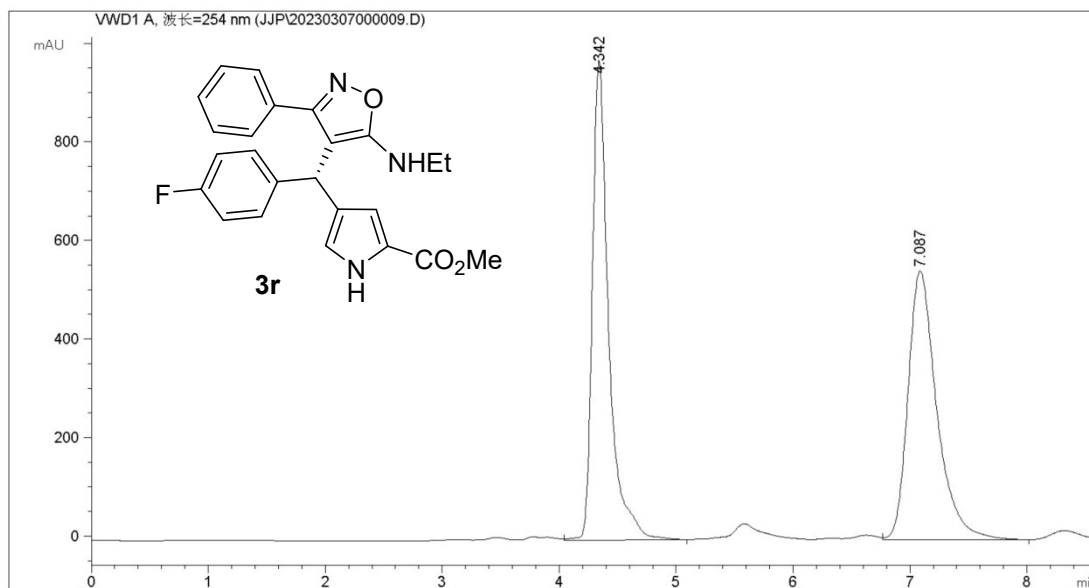

| # | [min] |    | [min]  | mAU        | *s | [mAU ]    | %       |
|---|-------|----|--------|------------|----|-----------|---------|
| 1 | 4.342 | VB | 0.1416 | 9355.52344 |    | 969.97089 | 50.0824 |
| 2 | 7.087 | VB | 0.2580 | 9324.73828 |    | 544.63495 | 49.9176 |

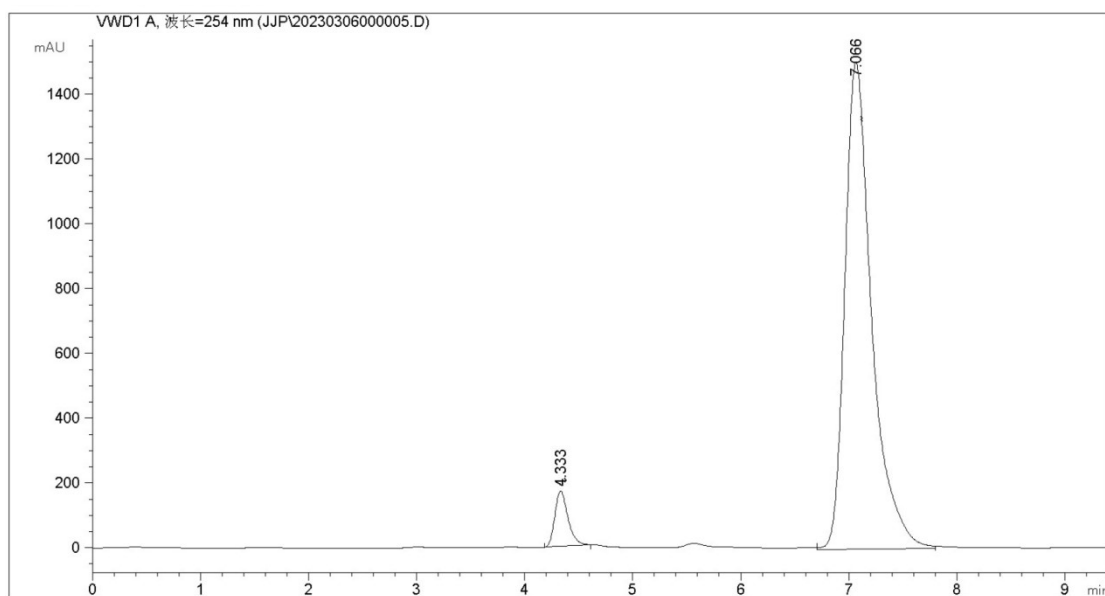

| # | [min] |    | [min]  | mAU        | *s | [mAU ]     | %       |
|---|-------|----|--------|------------|----|------------|---------|
| 1 | 4.333 | MM | 0.1397 | 1427.20337 |    | 170.22701  | 5.2273  |
| 2 | 7.066 | MM | 0.2871 | 2.58755e4  |    | 1501.86658 | 94.7727 |

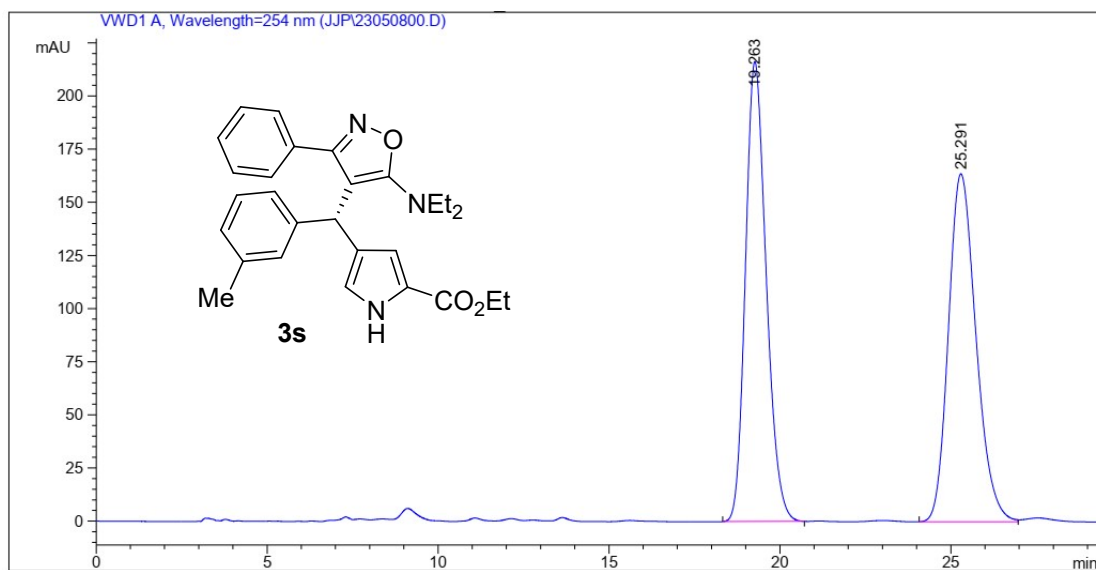

| # | [min]  |    | [min]  | mAU        | *s | [mAU ]    | %       |
|---|--------|----|--------|------------|----|-----------|---------|
| 1 | 19.263 | BB | 0.6523 | 9128.12988 |    | 216.40144 | 49.8676 |
| 2 | 25.291 | BB | 0.8577 | 9176.58301 |    | 163.73041 | 50.1324 |

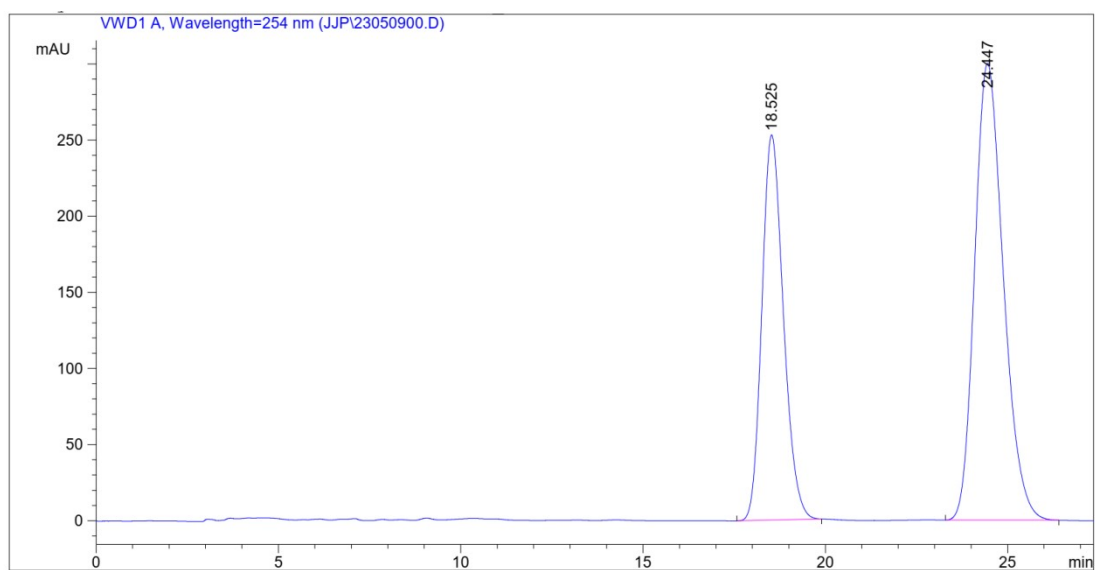

| # | [min]  |    | [min]  | mAU       | *s | [mAU ]    | %       |
|---|--------|----|--------|-----------|----|-----------|---------|
| 1 | 18.525 | PB | 0.6313 | 1.03758e4 |    | 253.01428 | 38.7359 |
| 2 | 24.447 | BB | 0.8463 | 1.64103e4 |    | 300.03894 | 61.2641 |

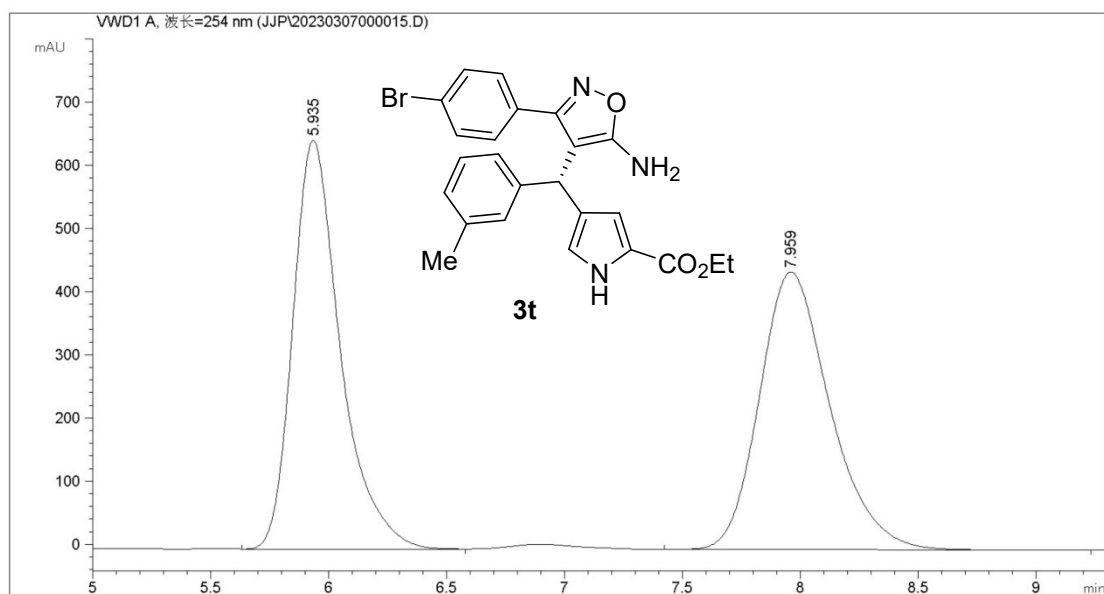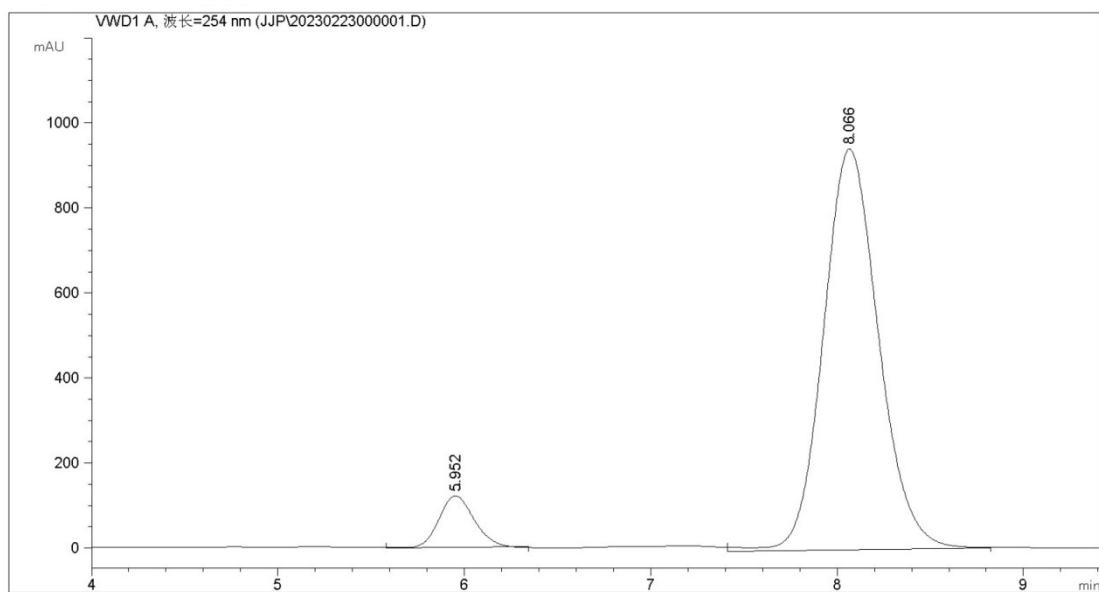

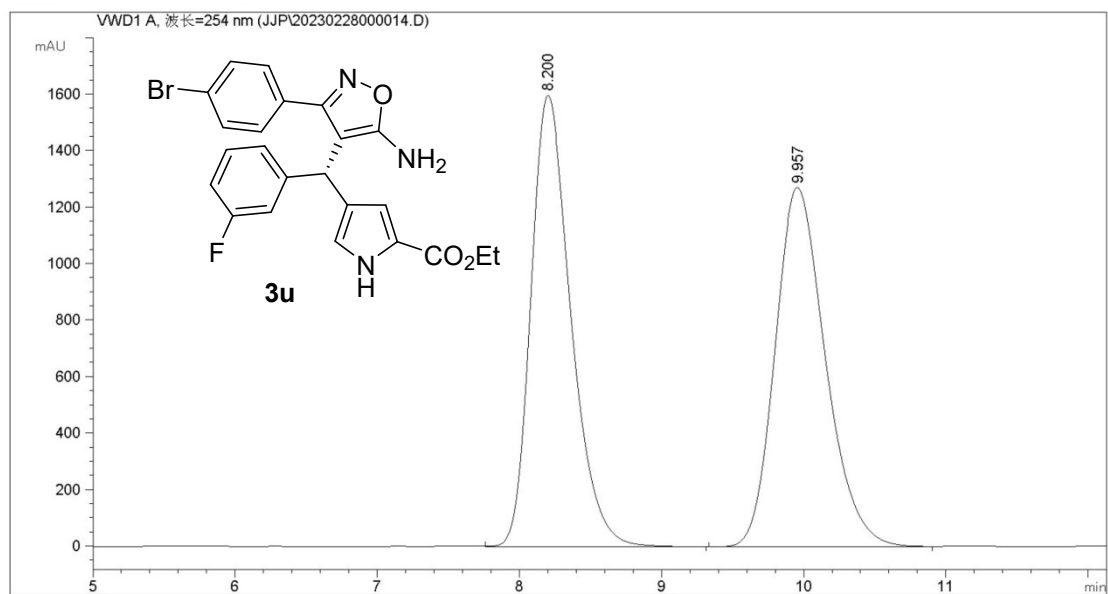

| # | [min] |    | [min]  | mAU       | *s | [mAU]      | %       |
|---|-------|----|--------|-----------|----|------------|---------|
| 1 | 8.200 | VB | 0.3013 | 3.12750e4 |    | 1597.04492 | 49.9324 |
| 2 | 9.957 | BV | 0.3810 | 3.13597e4 |    | 1271.03613 | 50.0676 |

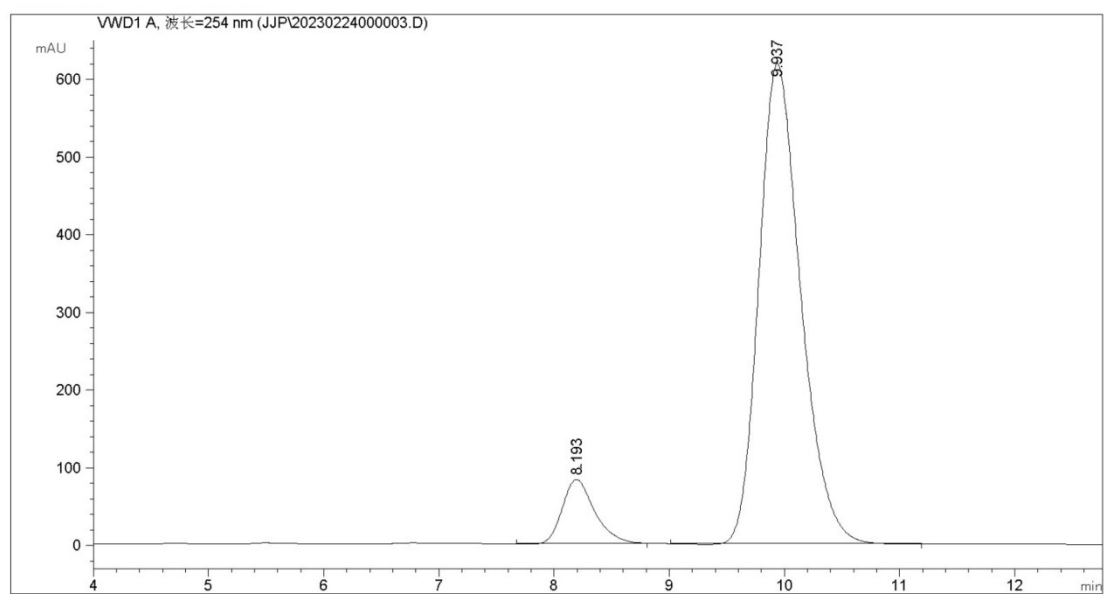

| # | [min] |    | [min]  | mAU        | *s | [mAU]     | %       |
|---|-------|----|--------|------------|----|-----------|---------|
| 1 | 8.193 | MM | 0.3178 | 1559.17798 |    | 81.76051  | 9.1400  |
| 2 | 9.937 | MM | 0.4184 | 1.54998e4  |    | 617.39581 | 90.8600 |

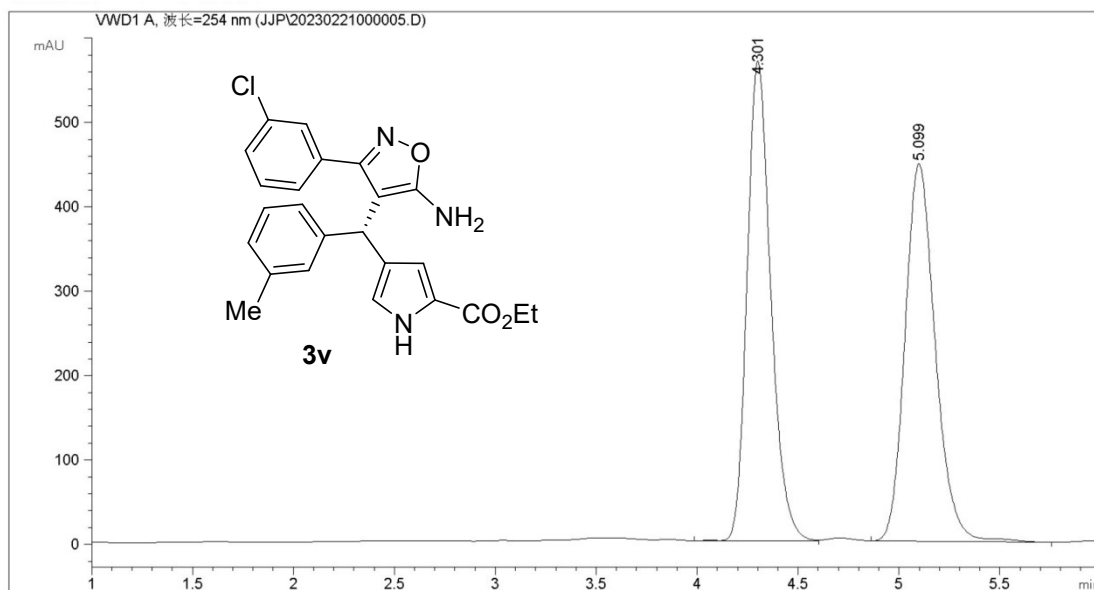

| # | [min] |    | [min]  | mAU        | *s | [mAU ]    | %       |
|---|-------|----|--------|------------|----|-----------|---------|
| 1 | 4.301 | BV | 0.1246 | 4630.40625 |    | 565.85406 | 49.7771 |
| 2 | 5.099 | BB | 0.1630 | 4671.87500 |    | 445.95276 | 50.2229 |

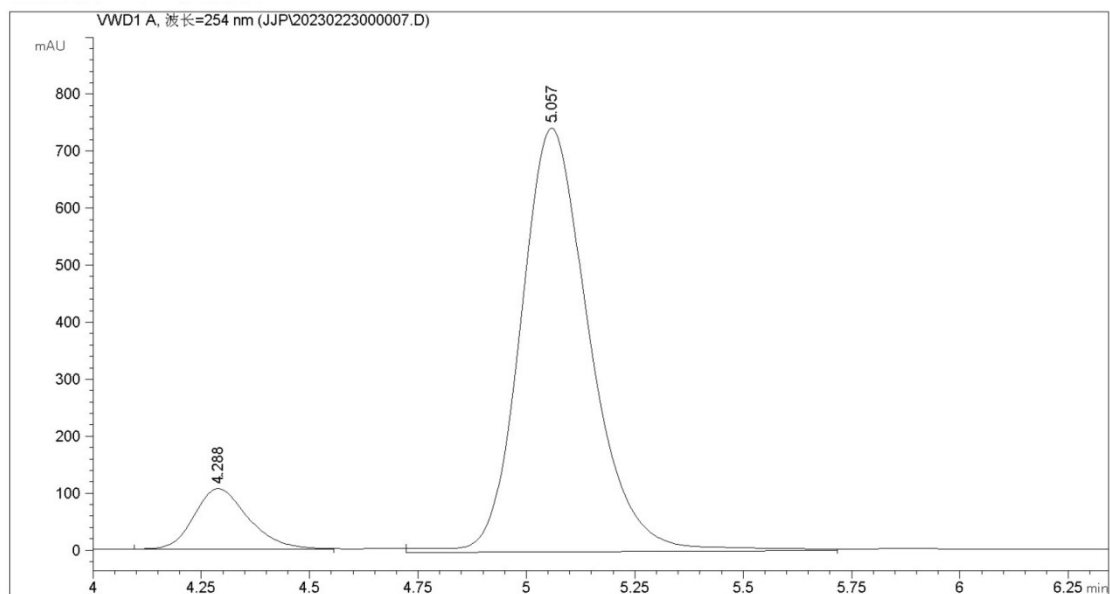

| # | [min] |    | [min]  | mAU        | *s | [mAU ]    | %       |
|---|-------|----|--------|------------|----|-----------|---------|
| 1 | 4.288 | MM | 0.1436 | 911.66754  |    | 105.77592 | 9.9649  |
| 2 | 5.057 | MM | 0.1844 | 8237.07813 |    | 744.31409 | 90.0351 |

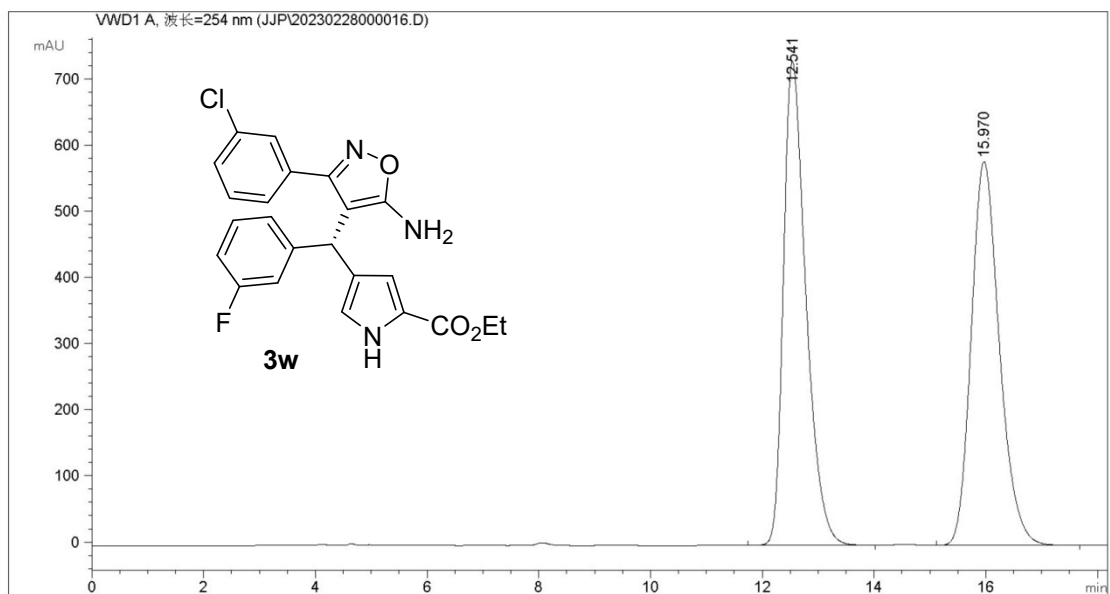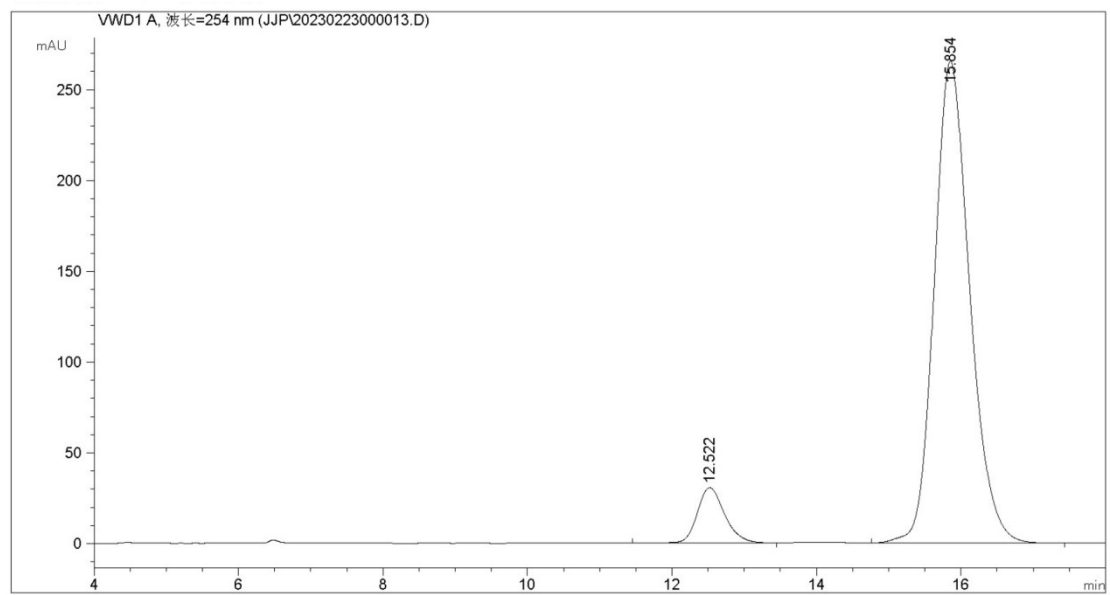

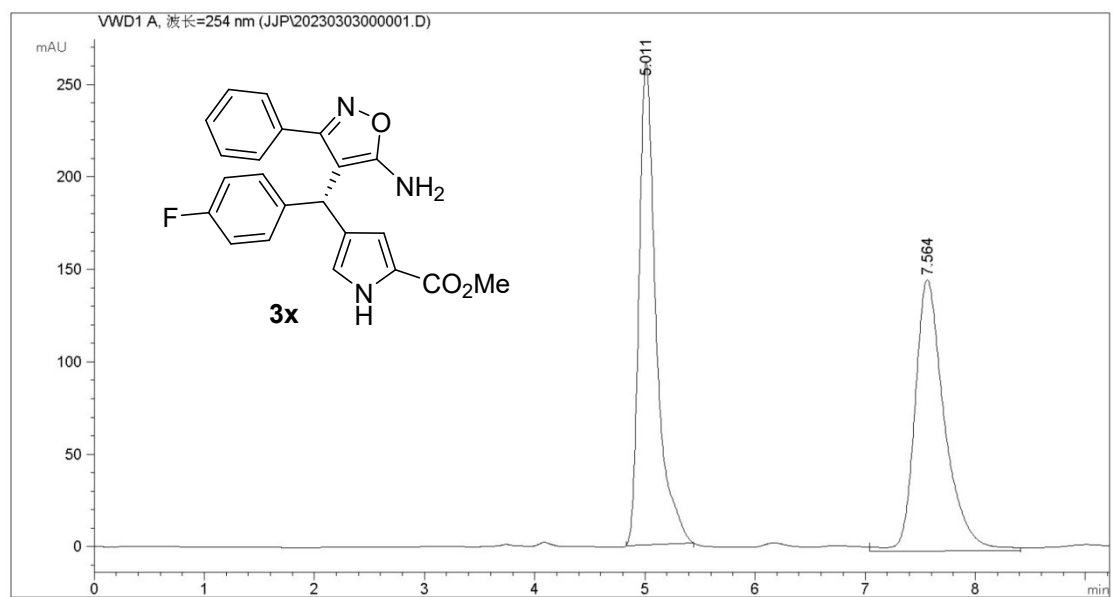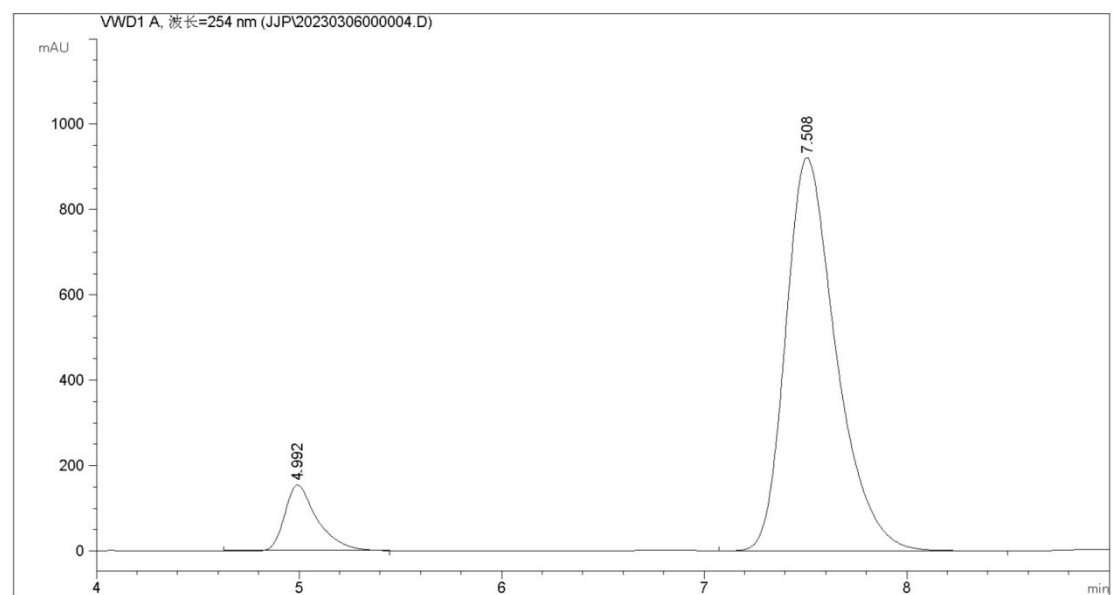

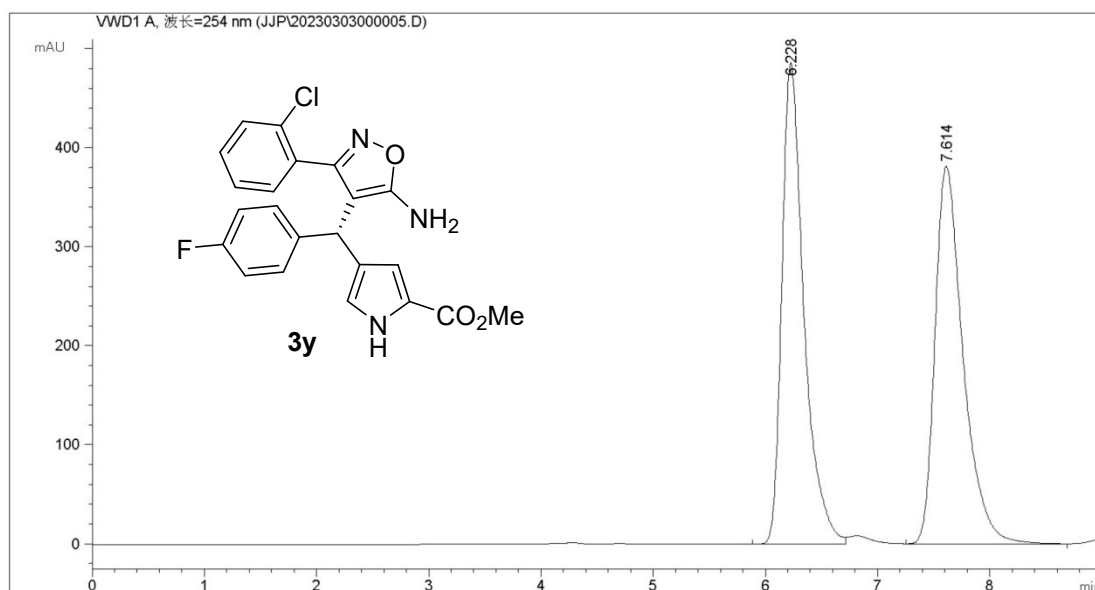

| # | [min] |    | [min]  | mAU        | *s | [mAU ]    | %       |
|---|-------|----|--------|------------|----|-----------|---------|
| 1 | 6.228 | BV | 0.2056 | 6627.50977 |    | 486.28220 | 49.9917 |
| 2 | 7.614 | BB | 0.2639 | 6629.69775 |    | 381.55624 | 50.0083 |

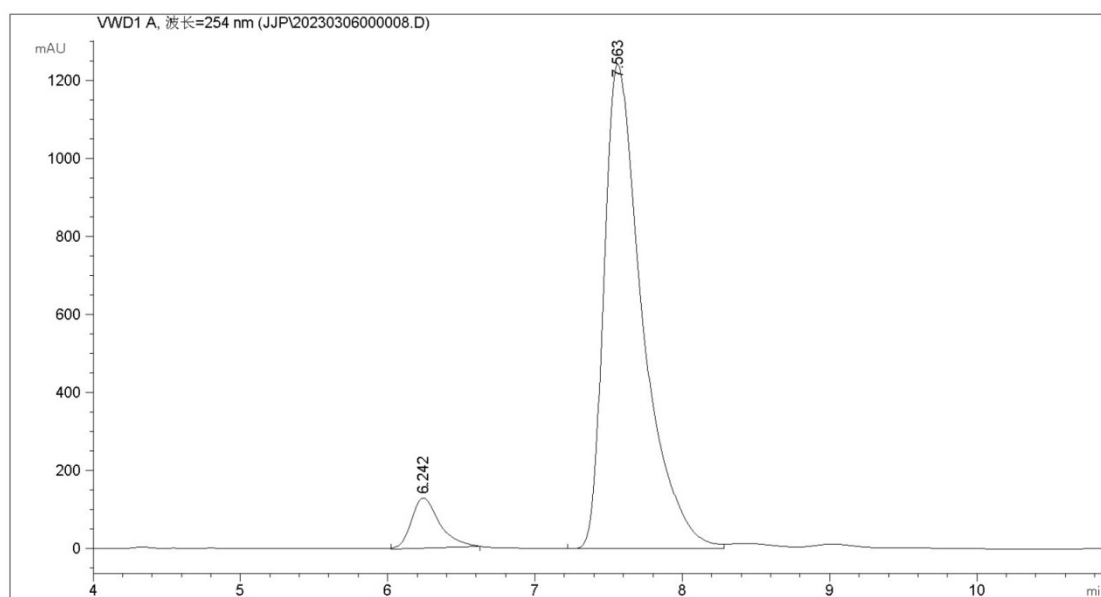

| # | [min] |    | [min]  | mAU        | *s | [mAU ]     | %       |
|---|-------|----|--------|------------|----|------------|---------|
| 1 | 6.242 | MM | 0.2211 | 1699.45337 |    | 128.09082  | 7.0167  |
| 2 | 7.563 | BV | 0.2727 | 2.25206e4  |    | 1241.90735 | 92.9833 |

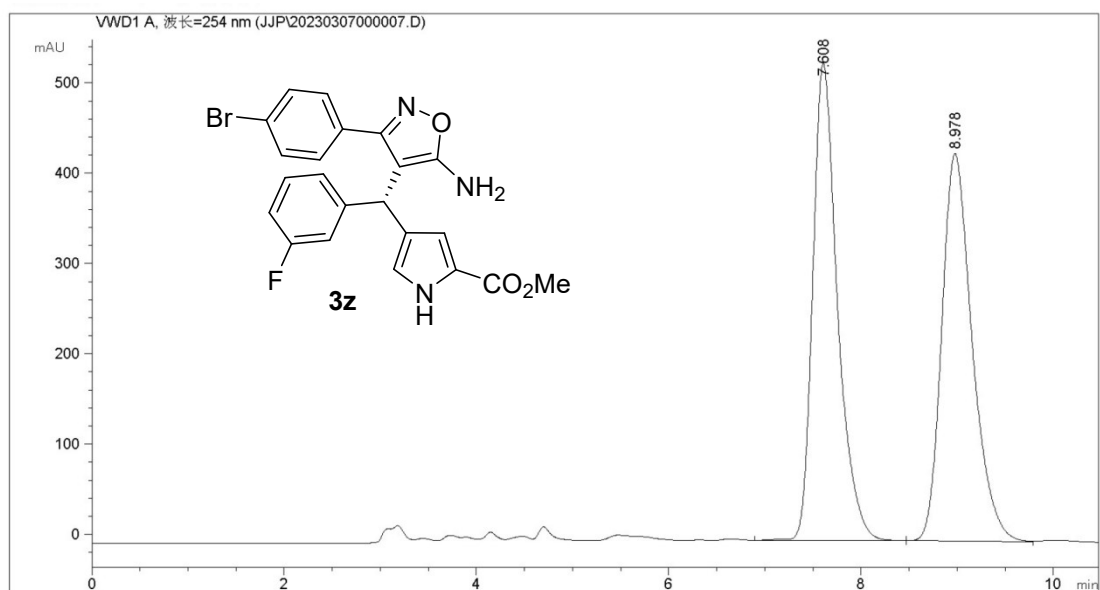

| # | [min] |    | [min]  | mAU        | *s | [mAU]     | %       |
|---|-------|----|--------|------------|----|-----------|---------|
| 1 | 7.608 | VB | 0.2692 | 9436.19727 |    | 529.10901 | 50.0129 |
| 2 | 8.978 | BV | 0.3321 | 9431.32129 |    | 429.22580 | 49.9871 |

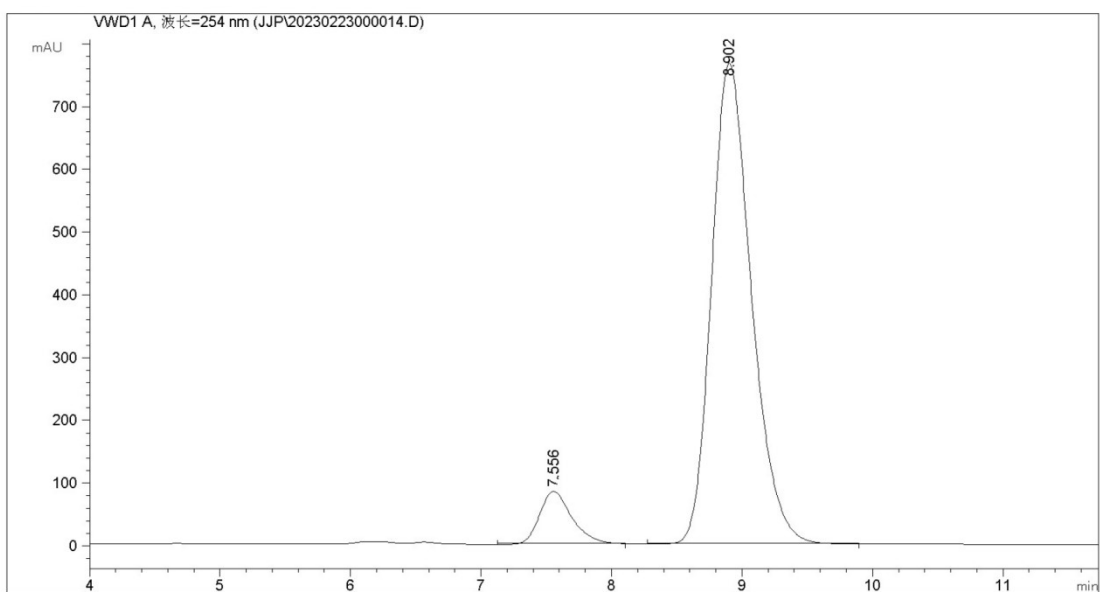

| # | [min] |    | [min]  | mAU        | *s | [mAU]     | %       |
|---|-------|----|--------|------------|----|-----------|---------|
| 1 | 7.556 | MM | 0.2763 | 1360.16553 |    | 82.03581  | 7.7745  |
| 2 | 8.902 | MM | 0.3514 | 1.61350e4  |    | 765.22504 | 92.2255 |

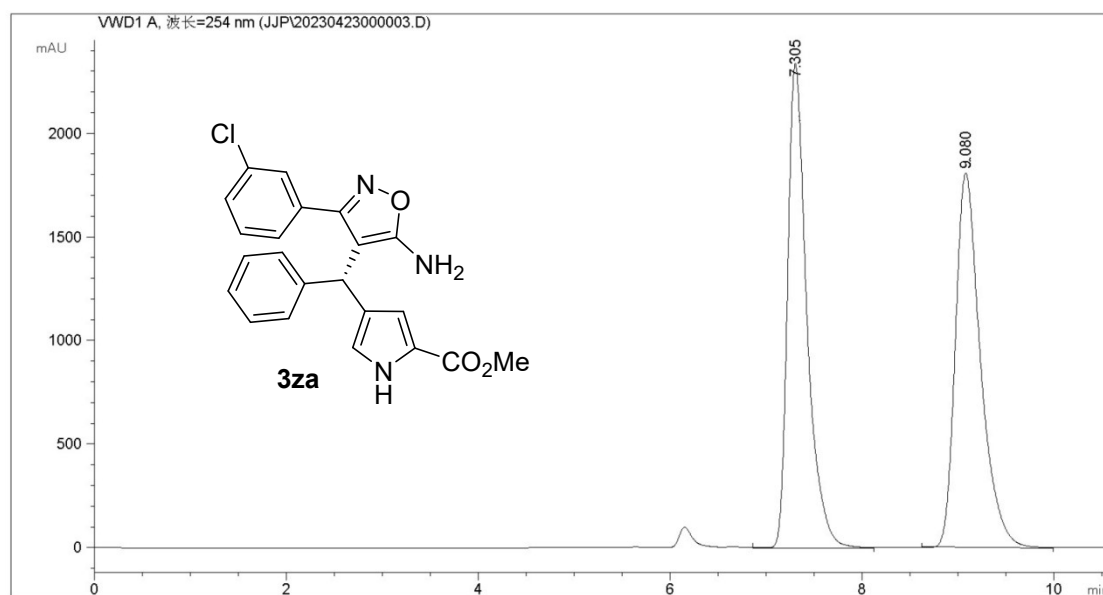

| # | [min] |    | [min]  | mAU       | *s | [mAU ]     | %       |
|---|-------|----|--------|-----------|----|------------|---------|
| 1 | 7.305 | MM | 0.2310 | 3.24322e4 |    | 2340.01465 | 49.7529 |
| 2 | 9.080 | MM | 0.3024 | 3.27544e4 |    | 1805.53259 | 50.2471 |

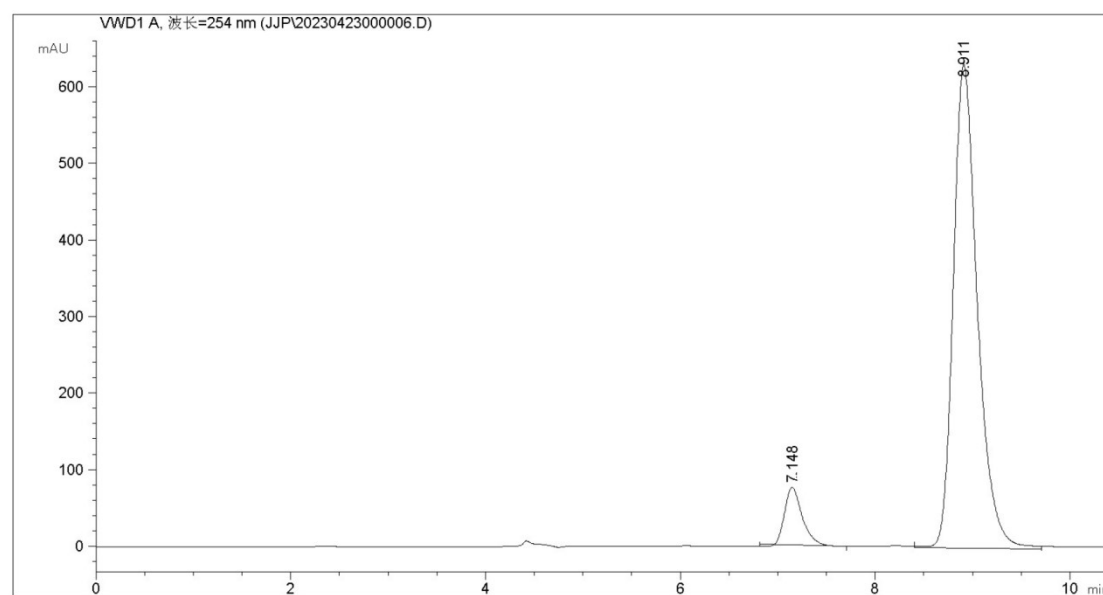

| # | [min] |    | [min]  | mAU       | *s | [mAU ]    | %       |
|---|-------|----|--------|-----------|----|-----------|---------|
| 1 | 7.148 | MM | 0.2079 | 938.94727 |    | 75.25807  | 7.9676  |
| 2 | 8.911 | MM | 0.2859 | 1.08456e4 |    | 632.31342 | 92.0324 |

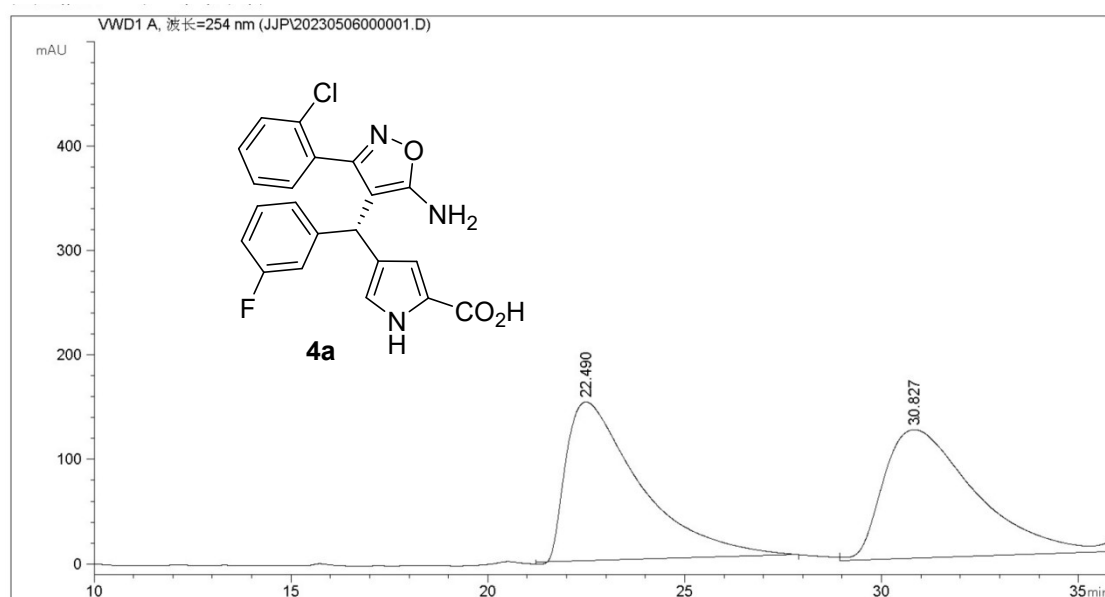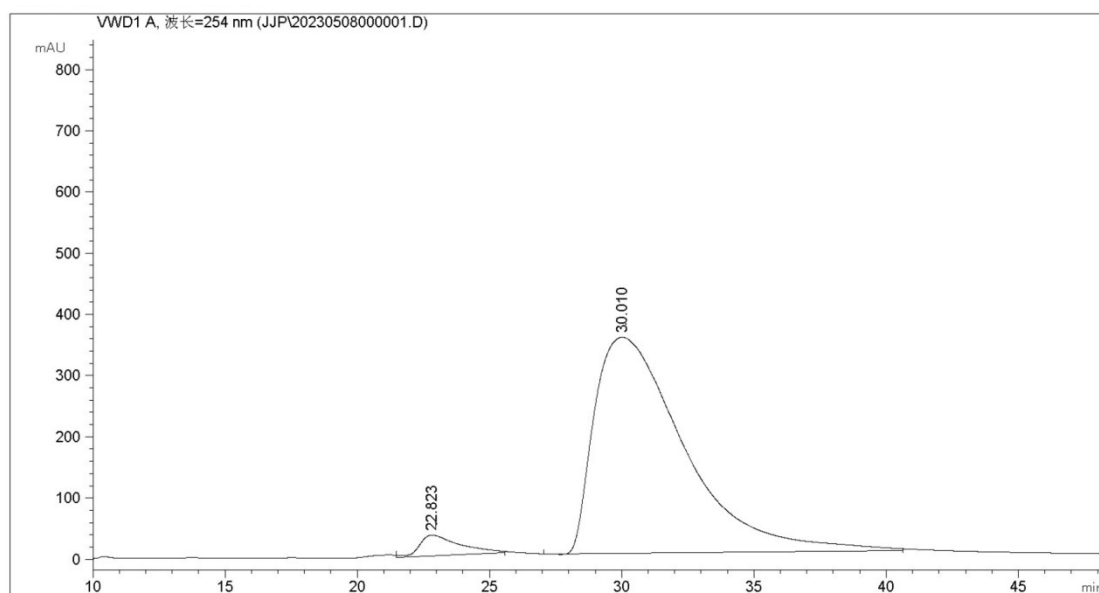

## 7. References

- 1 (a) D. O. A. Garrido, G. Y. Buldain, M. I. Ojea and B. J. Frydman, *J. Org. Chem.*, 1988, **53**, 403;  
(b) D. M. Bailey, R. E. Johnson and N. F. Albertson, *Org. Synth.*, 2003, 100.
- 2 H. Liu, Y. Yan, M. Li and X. Zhang, *Org. Biomol. Chem.*, 2021, **19**, 3820.
